# Supplementary material for: DNA O-MAP uncovers the molecular neighborhoods associated with specific genomic loci
Source: eLife. 2026 Apr 7;13:RP102489. doi: 10.7554/eLife.102489 (PMC13056364; doi:10.7554/eLife.102489)
Supplement: Supplementary file 2. [file elife-102489-supp2.xlsx]

## Sheet: Experiment Key
Experiment Name	Experiment Type	Table Values	Associated Figures
Telomere LFQ	Telomere loci examined by label-free quantification in HCT116 cells	SAINTexpress output	Fig1
Column Descriptions
Bait	Telomeric DNA O-MAP proximity labeling was used as the 'bait'
Prey	Uniprot accession for proximal proteins to the 'bait'
PreyGene	Prey Gene Symbol
Spec	Number of peptide spectral matches for prey in each of the telomeric DNA O-MAP runs
SpecSum	Total number of peptide spectral matches for prey in telomeric DNA O-MAP runs
AvgSpec	Average number of peptide spectral matches for prey in telomeric DNA O-MAP runs
NumReplicates	Total number of telomeric DNA O-MAP replicates analyzed
ctrlCounts	Total number of control no probe DNA O-MAP replicates analyzed
AvgP	Main probability score
MaxP	Maximal probabily score
TopoAvgP	Topology-aware probability score incorporating known interaction data (unused, same as AvgP)
TopoMaxP	Topology-aware maximal probability score over replicates (unused, same as MaxP)
SaintScore	Larger of AvgP and TopoAvgP
logOddsScore	SAINT's Log likelihood ratio
FoldChange	Average number of spectral counts in test interaction divided by the average in controls
BFDR	SAINT's Bayesian false discovery rate

## Sheet: Telomere SAINTexpress
Bait	Prey	PreyGene	Spec	SpecSum	AvgSpec	NumReplicates	ctrlCounts	AvgP	MaxP	TopoAvgP	TopoMaxP	SaintScore	logOddsScore	FoldChange	BFDR
Telomere	A0A024RBG1	NUDT4B	0|0|0|0|0|1	1	0.17	6	0|0|0|1	0	0	0	0	0	-1.91	0.67	0.55
Telomere	A0A0B4J2D5	GATD3B	0|1|3|2|0|1	7	1.17	6	3|0|0|0	0.36	0.65	0.36	0.65	0.36	-3.95	1.56	0.3
Telomere	A0AVT1	UBA6	10|2|0|1|0|0	13	2.17	6	0|0|0|1	0.6	1	0.6	1	0.6	-1.91	8.67	0.22
Telomere	A0FGR8	ESYT2	4|1|0|1|0|0	6	1	6	1|0|0|2	0.29	0.86	0.29	0.86	0.29	-3.71	1.33	0.5
Telomere	A0MZ66	SHTN1	12|1|0|1|1|3	18	3	6	1|0|0|1	0.6	1	0.6	1	0.6	-2.81	6	0.22
Telomere	A1L0T0	ILVBL	1|0|0|1|1|2	5	0.83	6	1|0|0|3	0.07	0.22	0.07	0.22	0.07	-4.16	0.83	0.54
Telomere	A1X283	SH3PXD2B	5|0|0|0|0|0	5	0.83	6	0|0|0|1	0.33	1	0.33	1	0.33	-1.91	3.33	0.39
Telomere	A2RRP1	NBAS	10|0|0|0|0|0	10	1.67	6	0|0|0|0	0.33	1	0.33	1	0.33	-1.37	16.67	0.32
Telomere	A3KMH1	VWA8	4|0|1|2|1|0	8	1.33	6	1|0|0|0	0.59	0.99	0.59	0.99	0.59	-1.91	5.33	0.22
Telomere	A3KN83	SBNO1	14|2|0|0|0|0	16	2.67	6	0|0|0|0	0.65	1	0.65	1	0.65	-1.37	26.67	0.17
Telomere	A4D1E9	GTPBP10	1|0|0|0|0|0	1	0.17	6	0|0|0|0	0	0	0	0	0	-1.37	1.67	0.55
Telomere	A4D1P6	WDR91	1|0|0|1|0|0	2	0.33	6	0|0|0|0	0	0	0	0	0	-1.37	3.33	0.55
Telomere	A5YKK6	CNOT1	26|0|0|1|0|2	29	4.83	6	0|0|0|10	0.33	0.98	0.33	0.98	0.33	-9.94	1.93	0.43
Telomere	A6ND36	FAM83G	2|0|0|1|0|0	3	0.5	6	0|0|0|1	0.26	0.79	0.26	0.79	0.26	-1.91	2	0.5
Telomere	A6NDG6	PGP	2|0|0|0|0|0	2	0.33	6	0|0|0|0	0.32	0.96	0.32	0.96	0.32	-1.37	3.33	0.44
Telomere	A6NDU8	C5orf51	2|0|0|0|0|0	2	0.33	6	0|0|0|0	0.32	0.96	0.32	0.96	0.32	-1.37	3.33	0.44
Telomere	A6NHG4	DDTL	1|0|0|0|0|0	1	0.17	6	0|0|0|0	0	0	0	0	0	-1.37	1.67	0.55
Telomere	A6NHL2	TUBAL3	3|0|1|1|0|1	6	1	6	1|0|0|0	0.32	0.95	0.32	0.95	0.32	-1.91	4	0.48
Telomere	A6NHR9	SMCHD1	26|6|1|1|0|0	34	5.67	6	0|0|0|2	0.66	1	0.66	1	0.66	-2.91	11.33	0.17
Telomere	A6NIH7	UNC119B	0|1|1|1|1|1	5	0.83	6	1|0|0|1	0	0	0	0	0	-2.81	1.67	0.55
Telomere	A6NKH3	RPL37AP8	0|1|1|1|0|0	3	0.5	6	0|0|0|0	0	0	0	0	0	-1.37	5	0.55
Telomere	A8CG34	POM121C	11|0|0|0|0|1	12	2	6	0|0|0|4	0.32	0.97	0.32	0.97	0.32	-3.82	2	0.44
Telomere	A8MPP1	DDX11L8	3|0|0|0|0|0	3	0.5	6	0|0|0|0	0.33	0.99	0.33	0.99	0.33	-1.37	5	0.4
Telomere	A8MWD9	SNRPGP15	1|3|1|1|1|1	8	1.33	6	0|0|0|0	0.33	0.99	0.33	0.99	0.33	1.14	13.33	0.4
Telomere	A8MXV4	NUDT19	0|0|0|0|0|1	1	0.17	6	0|0|0|0	0	0	0	0	0	-1.37	1.67	0.55
Telomere	B1AK53	ESPN	2|0|0|0|0|0	2	0.33	6	0|0|0|0	0.32	0.96	0.32	0.96	0.32	-1.37	3.33	0.44
Telomere	B7ZAQ6	GPR89A	2|0|0|0|0|0	2	0.33	6	0|0|0|0	0.32	0.96	0.32	0.96	0.32	-1.37	3.33	0.44
Telomere	B7ZW38	HNRNPCL3	0|1|1|1|1|0	4	0.67	6	0|0|0|1	0	0	0	0	0	-1.91	2.67	0.55
Telomere	E9PAV3	NACA	0|2|1|2|0|2	7	1.17	6	1|0|0|1	0.53	0.53	0.53	0.53	0.53	-2.81	2.33	0.25
Telomere	E9PRG8	C11orf98	1|1|1|2|0|1	6	1	6	1|0|1|1	0.11	0.33	0.11	0.33	0.11	-3.71	1.33	0.53
Telomere	G2XKQ0	SUMO1P1	0|2|0|1|0|1	4	0.67	6	0|0|0|2	0.19	0.57	0.19	0.57	0.19	-2.91	1.33	0.52
Telomere	O00116	AGPS	10|0|0|1|0|2	13	2.17	6	0|0|0|4	0.42	0.96	0.42	0.96	0.42	-3.82	2.17	0.29
Telomere	O00139	KIF2A	5|4|1|1|0|1	12	2	6	0|0|0|1	0.66	1	0.66	1	0.66	-1.91	8	0.16
Telomere	O00148	DDX39A	6|6|1|2|3|1	19	3.17	6	1|0|0|1	0.94	1	0.94	1	0.94	-1.2	6.33	0.02
Telomere	O00151	PDLIM1	1|2|0|0|0|1	4	0.67	6	0|0|0|1	0.26	0.79	0.26	0.79	0.26	-1.91	2.67	0.5
Telomere	O00154	ACOT7	4|3|3|3|1|3	17	2.83	6	2|0|0|5	0.14	0.24	0.14	0.24	0.14	-5.48	1.62	0.53
Telomere	O00159	MYO1C	11|7|6|5|4|6	39	6.5	6	5|0|0|9	0.19	0.5	0.19	0.5	0.19	-6.67	1.86	0.52
Telomere	O00170	AIP	2|2|2|2|1|1	10	1.67	6	2|0|0|1	0.33	0.33	0.33	0.33	0.33	-2.11	2.22	0.39
Telomere	O00178	GTPBP1	2|0|0|0|0|0	2	0.33	6	0|0|0|1	0.26	0.79	0.26	0.79	0.26	-1.91	1.33	0.5
Telomere	O00186	STXBP3	1|0|0|0|0|0	1	0.17	6	0|0|0|1	0	0	0	0	0	-1.91	0.67	0.55
Telomere	O00189	AP4M1	1|0|0|0|0|0	1	0.17	6	0|0|0|0	0	0	0	0	0	-1.37	1.67	0.55
Telomere	O00193	SMAP	0|3|0|0|0|2	5	0.83	6	0|0|0|0	0.65	0.99	0.65	0.99	0.65	-1.37	8.33	0.18
Telomere	O00203	AP3B1	7|2|4|4|0|1	18	3	6	2|0|0|9	0.11	0.28	0.11	0.28	0.11	-11.3	1.09	0.53
Telomere	O00214	LGALS8	2|0|0|0|0|0	2	0.33	6	0|0|0|0	0.32	0.96	0.32	0.96	0.32	-1.37	3.33	0.44
Telomere	O00217	NDUFS8	0|0|0|0|1|1	2	0.33	6	0|0|0|0	0	0	0	0	0	-1.37	3.33	0.55
Telomere	O00221	NFKBIE	1|0|0|0|0|0	1	0.17	6	0|0|0|1	0	0	0	0	0	-1.91	0.67	0.55
Telomere	O00231	PSMD11	12|7|1|0|1|6	27	4.5	6	0|0|0|6	0.83	0.94	0.83	0.94	0.83	-6.07	3	0.06
Telomere	O00232	PSMD12	12|9|3|3|2|6	35	5.83	6	2|0|1|6	0.68	0.92	0.68	0.92	0.68	-5.55	2.59	0.12
Telomere	O00233	PSMD9	0|1|0|0|0|2	3	0.5	6	0|0|0|0	0.32	0.96	0.32	0.96	0.32	-1.37	5	0.44
Telomere	O00255	MEN1	2|0|0|0|0|0	2	0.33	6	0|0|0|0	0.32	0.96	0.32	0.96	0.32	-1.37	3.33	0.44
Telomere	O00264	PGRMC1	1|0|0|0|0|2	3	0.5	6	0|0|0|0	0.32	0.96	0.32	0.96	0.32	-1.37	5	0.44
Telomere	O00267	SUPT5H	21|27|8|7|4|4	71	11.83	6	0|0|0|1	1	1	1	1	1	4.59	47.33	0
Telomere	O00268	TAF4	0|2|0|0|0|1	3	0.5	6	0|0|0|0	0.32	0.96	0.32	0.96	0.32	-1.37	5	0.44
Telomere	O00273	DFFA	0|3|0|1|0|0	4	0.67	6	0|0|0|1	0.32	0.95	0.32	0.95	0.32	-1.91	2.67	0.48
Telomere	O00291	HIP1	3|0|0|0|0|0	3	0.5	6	0|0|0|4	0.18	0.53	0.18	0.53	0.18	-3.82	0.5	0.52
Telomere	O00299	CLIC1	6|6|5|5|4|5	31	5.17	6	6|0|1|7	0.01	0.01	0.01	0.01	0.01	-6.9	1.48	0.54
Telomere	O00303	EIF3F	9|6|0|4|2|5	26	4.33	6	2|0|0|6	0.54	0.82	0.54	0.82	0.54	-8.01	2.17	0.25
Telomere	O00308	WWP2	3|0|0|0|0|0	3	0.5	6	0|0|0|0	0.33	0.99	0.33	0.99	0.33	-1.37	5	0.4
Telomere	O00330	PDHX	1|1|3|0|0|0	5	0.83	6	0|0|0|0	0.33	0.99	0.33	0.99	0.33	-1.37	8.33	0.4
Telomere	O00401	WASL	2|0|0|0|0|0	2	0.33	6	0|0|0|0	0.32	0.96	0.32	0.96	0.32	-1.37	3.33	0.44
Telomere	O00410	IPO5	32|13|5|6|5|10	71	11.83	6	7|0|1|15	0.33	0.95	0.33	0.95	0.33	-13.12	2.06	0.43
Telomere	O00411	POLRMT	9|1|6|6|2|5	29	4.83	6	6|0|0|2	0.6	0.82	0.6	0.82	0.6	-5.91	2.42	0.22
Telomere	O00422	SAP18	2|2|1|1|2|1	9	1.5	6	0|0|0|0	0.96	0.96	0.96	0.96	0.96	1.14	15	0.02
Telomere	O00425	IGF2BP3	4|1|0|1|0|2	8	1.33	6	0|0|0|3	0.41	0.77	0.41	0.77	0.41	-3.95	1.78	0.29
Telomere	O00429	DNM1L	14|0|0|0|1|1	16	2.67	6	0|0|0|6	0.32	0.96	0.32	0.96	0.32	-6.07	1.78	0.48
Telomere	O00442	RTCA	2|3|0|0|0|1	6	1	6	0|0|0|2	0.45	0.77	0.45	0.77	0.45	-2.91	2	0.28
Telomere	O00443	PIK3C2A	9|0|0|0|0|0	9	1.5	6	0|0|0|3	0.33	0.98	0.33	0.98	0.33	-3.95	2	0.43
Telomere	O00459	PIK3R2	1|0|0|0|0|0	1	0.17	6	0|0|0|0	0	0	0	0	0	-1.37	1.67	0.55
Telomere	O00471	EXOC5	6|0|0|0|0|0	6	1	6	1|0|0|0	0.33	1	0.33	1	0.33	-1.91	4	0.36
Telomere	O00487	PSMD14	11|5|2|1|3|4	26	4.33	6	1|0|0|4	0.74	0.97	0.74	0.97	0.74	-3.56	3.47	0.09
Telomere	O00505	KPNA3	7|4|1|1|0|2	15	2.5	6	0|0|0|5	0.53	0.84	0.53	0.84	0.53	-4.94	2	0.25
Telomere	O00506	STK25	1|0|0|0|0|0	1	0.17	6	0|0|0|0	0	0	0	0	0	-1.37	1.67	0.55
Telomere	O00515	LAD1	2|0|0|0|0|1	3	0.5	6	0|0|0|1	0.26	0.79	0.26	0.79	0.26	-1.91	2	0.5
Telomere	O00541	PES1	8|4|3|3|2|7	27	4.5	6	4|1|0|5	0.33	0.58	0.33	0.58	0.33	-6.62	1.8	0.43
Telomere	O00559	EBAG9	0|0|0|1|0|0	1	0.17	6	0|0|0|0	0	0	0	0	0	-1.37	1.67	0.55
Telomere	O00560	SDCBP	2|1|0|0|1|1	5	0.83	6	0|0|0|1	0.26	0.79	0.26	0.79	0.26	-1.91	3.33	0.5
Telomere	O00566	MPHOSPH10	3|1|0|0|0|0	4	0.67	6	0|0|0|3	0.22	0.65	0.22	0.65	0.22	-3.95	0.89	0.52
Telomere	O00567	NOP56	16|10|2|1|2|6	37	6.17	6	3|0|0|11	0.42	0.86	0.42	0.86	0.42	-11.68	1.76	0.29
Telomere	O00571	DDX3X	13|8|6|7|6|8	48	8	6	6|0|2|8	0.21	0.58	0.21	0.58	0.21	-5.93	2	0.52
Telomere	O00592	PODXL	0|0|0|0|0|1	1	0.17	6	0|0|0|0	0	0	0	0	0	-1.37	1.67	0.55
Telomere	O00625	PIR	1|0|0|0|0|0	1	0.17	6	0|0|0|0	0	0	0	0	0	-1.37	1.67	0.55
Telomere	O00629	KPNA4	3|2|0|0|0|1	6	1	6	0|0|0|2	0.45	0.77	0.45	0.77	0.45	-2.91	2	0.28
Telomere	O00743	PPP6C	1|1|0|0|0|1	3	0.5	6	0|0|0|0	0	0	0	0	0	-1.37	5	0.55
Telomere	O00763	ACACB	1|9|9|13|8|7	47	7.83	6	22|6|8|0	0	0	0	0	0	-34.75	0.87	0.55
Telomere	O00767	SCD	1|1|1|0|0|0	3	0.5	6	0|0|0|0	0	0	0	0	0	-1.37	5	0.55
Telomere	O14497	ARID1A	6|10|2|2|1|0	21	3.5	6	0|0|0|0	0.99	1	0.99	1	0.99	-1.37	35	0
Telomere	O14519	CDK2AP1	1|0|0|0|0|0	1	0.17	6	0|0|0|0	0	0	0	0	0	-1.37	1.67	0.55
Telomere	O14561	NDUFAB1	0|0|1|1|1|2	5	0.83	6	0|0|0|0	0.32	0.96	0.32	0.96	0.32	-1.37	8.33	0.44
Telomere	O14562	UBFD1	0|1|0|0|0|0	1	0.17	6	0|0|0|0	0	0	0	0	0	-1.37	1.67	0.55
Telomere	O14578	CIT	8|0|0|0|0|0	8	1.33	6	0|0|0|0	0.33	1	0.33	1	0.33	-1.37	13.33	0.33
Telomere	O14579	COPE	5|2|0|0|1|1	9	1.5	6	1|0|0|4	0.27	0.7	0.27	0.7	0.27	-5.18	1.2	0.5
Telomere	O14617	AP3D1	18|3|1|2|1|3	28	4.67	6	1|0|0|9	0.32	0.94	0.32	0.94	0.32	-7.75	1.87	0.44
Telomere	O14640	DVL1	3|0|0|0|0|0	3	0.5	6	0|0|0|1	0.32	0.95	0.32	0.95	0.32	-1.91	2	0.48
Telomere	O14646	CHD1	8|9|0|1|0|2	20	3.33	6	0|0|0|1	0.93	1	0.93	1	0.93	-1.91	13.33	0.02
Telomere	O14647	CHD2	0|4|0|0|0|1	5	0.83	6	0|0|0|0	0.33	1	0.33	1	0.33	-1.37	8.33	0.37
Telomere	O14672	ADAM10	0|1|0|0|0|0	1	0.17	6	0|0|0|0	0	0	0	0	0	-1.37	1.67	0.55
Telomere	O14681	EI24	1|0|0|0|0|0	1	0.17	6	0|0|0|0	0	0	0	0	0	-1.37	1.67	0.55
Telomere	O14683	TP53I11	1|0|0|0|0|0	1	0.17	6	0|0|0|0	0	0	0	0	0	-1.37	1.67	0.55
Telomere	O14686	KMT2D	0|1|0|0|0|0	1	0.17	6	0|0|0|1	0	0	0	0	0	-1.91	0.67	0.55
Telomere	O14715	RGPD8	1|0|0|0|0|0	1	0.17	6	0|0|0|0	0	0	0	0	0	-1.37	1.67	0.55
Telomere	O14737	PDCD5	0|3|4|2|2|2	13	2.17	6	1|0|0|0	0.91	0.99	0.91	0.99	0.91	-1.91	8.67	0.03
Telomere	O14744	PRMT5	5|7|2|2|0|0	16	2.67	6	2|0|0|6	0.32	0.64	0.32	0.64	0.32	-8.01	1.33	0.49
Telomere	O14745	SLC9A3R1	4|2|1|1|0|1	9	1.5	6	0|0|0|1	0.59	0.99	0.59	0.99	0.59	-1.91	6	0.22
Telomere	O14757	CHEK1	2|1|0|0|0|0	3	0.5	6	0|0|0|0	0.32	0.96	0.32	0.96	0.32	-1.37	5	0.44
Telomere	O14776	TCERG1	10|12|2|3|0|1	28	4.67	6	0|0|0|0	1	1	1	1	1	-1.37	46.67	0
Telomere	O14777	NDC80	3|0|0|0|0|0	3	0.5	6	0|0|0|1	0.32	0.95	0.32	0.95	0.32	-1.91	2	0.48
Telomere	O14787	TNPO2	6|0|0|0|0|2	8	1.33	6	0|0|0|0	0.65	1	0.65	1	0.65	-1.37	13.33	0.17
Telomere	O14795	UNC13B	2|0|0|0|0|0	2	0.33	6	0|0|0|0	0.32	0.96	0.32	0.96	0.32	-1.37	3.33	0.44
Telomere	O14802	POLR3A	6|7|0|1|0|0	14	2.33	6	0|0|0|0	0.67	1	0.67	1	0.67	-1.37	23.33	0.13
Telomere	O14818	PSMA7	3|8|3|3|3|6	26	4.33	6	1|0|1|0	0.94	1	0.94	1	0.94	1.47	8.67	0.02
Telomere	O14828	SCAMP3	1|1|2|1|0|1	6	1	6	1|0|0|2	0.11	0.33	0.11	0.33	0.11	-3.71	1.33	0.53
Telomere	O14874	BCKDK	1|0|1|1|1|0	4	0.67	6	1|0|0|0	0	0	0	0	0	-1.91	2.67	0.55
Telomere	O14880	MGST3	2|0|1|1|1|1	6	1	6	0|0|0|0	0.32	0.96	0.32	0.96	0.32	-1.37	10	0.44
Telomere	O14893	GEMIN2	1|0|0|0|0|0	1	0.17	6	0|0|0|0	0	0	0	0	0	-1.37	1.67	0.55
Telomere	O14908	GIPC1	1|1|0|0|0|0	2	0.33	6	1|0|0|1	0	0	0	0	0	-2.81	0.67	0.55
Telomere	O14920	IKBKB	1|0|0|0|1|0	2	0.33	6	0|0|0|0	0	0	0	0	0	-1.37	3.33	0.55
Telomere	O14929	HAT1	6|5|1|2|0|1	15	2.5	6	1|0|0|1	0.84	1	0.84	1	0.84	-2.81	5	0.06
Telomere	O14936	CASK	2|0|0|0|0|0	2	0.33	6	0|0|0|0	0.32	0.96	0.32	0.96	0.32	-1.37	3.33	0.44
Telomere	O14944	EREG	0|1|0|0|0|0	1	0.17	6	0|0|0|0	0	0	0	0	0	-1.37	1.67	0.55
Telomere	O14950	MYL12B	5|3|1|1|3|6	19	3.17	6	2|0|0|4	0.49	0.73	0.49	0.73	0.49	-4.59	2.11	0.26
Telomere	O14964	HGS	5|1|2|2|3|2	15	2.5	6	1|0|0|2	0.64	0.96	0.64	0.96	0.64	-2.11	3.33	0.2
Telomere	O14965	AURKA	1|0|0|0|0|0	1	0.17	6	0|0|0|0	0	0	0	0	0	-1.37	1.67	0.55
Telomere	O14972	VPS26C	1|0|0|0|0|0	1	0.17	6	0|0|0|0	0	0	0	0	0	-1.37	1.67	0.55
Telomere	O14974	PPP1R12A	11|1|0|0|0|0	12	2	6	0|0|0|2	0.33	1	0.33	1	0.33	-2.91	4	0.37
Telomere	O14976	GAK	13|0|0|1|0|1	15	2.5	6	0|0|0|8	0.3	0.91	0.3	0.91	0.3	-7.66	1.25	0.49
Telomere	O14979	HNRNPDL	4|12|9|7|8|9	49	8.17	6	2|0|0|4	0.94	0.98	0.94	0.98	0.94	-0.53	5.44	0.02
Telomere	O14980	XPO1	34|11|8|5|2|8	68	11.33	6	9|1|0|24	0.27	0.81	0.27	0.81	0.27	-29.6	1.33	0.5
Telomere	O14981	BTAF1	6|8|0|0|0|0	14	2.33	6	0|0|0|1	0.67	1	0.67	1	0.67	-1.91	9.33	0.14
Telomere	O15013	ARHGEF10	4|1|0|1|0|0	6	1	6	0|0|0|0	0.33	1	0.33	1	0.33	-1.37	10	0.37
Telomere	O15014	ZNF609	1|1|0|0|0|0	2	0.33	6	0|0|0|0	0	0	0	0	0	-1.37	3.33	0.55
Telomere	O15020	SPTBN2	1|0|0|0|0|0	1	0.17	6	0|0|0|0	0	0	0	0	0	-1.37	1.67	0.55
Telomere	O15027	SEC16A	16|0|0|0|0|0	16	2.67	6	0|0|0|6	0.32	0.97	0.32	0.97	0.32	-6.07	1.78	0.43
Telomere	O15042	U2SURP	15|13|2|3|3|2	38	6.33	6	1|0|0|2	0.88	1	0.88	1	0.88	-0.7	8.44	0.04
Telomere	O15047	SETD1A	4|4|0|1|0|0	9	1.5	6	0|0|0|0	0.67	1	0.67	1	0.67	-1.37	15	0.14
Telomere	O15055	PER2	0|2|0|0|0|0	2	0.33	6	0|0|0|0	0.32	0.96	0.32	0.96	0.32	-1.37	3.33	0.44
Telomere	O15056	SYNJ2	2|0|0|0|0|0	2	0.33	6	0|0|0|0	0.32	0.96	0.32	0.96	0.32	-1.37	3.33	0.44
Telomere	O15063	GARRE1	2|0|0|0|0|0	2	0.33	6	0|0|0|0	0.32	0.96	0.32	0.96	0.32	-1.37	3.33	0.44
Telomere	O15067	PFAS	3|0|0|0|0|0	3	0.5	6	0|0|0|0	0.33	0.99	0.33	0.99	0.33	-1.37	5	0.4
Telomere	O15083	ERC2	1|0|0|0|0|0	1	0.17	6	0|0|0|0	0	0	0	0	0	-1.37	1.67	0.55
Telomere	O15084	ANKRD28	3|1|1|1|0|0	6	1	6	1|0|0|1	0.27	0.81	0.27	0.81	0.27	-2.81	2	0.5
Telomere	O15085	ARHGEF11	4|0|0|0|0|0	4	0.67	6	0|0|0|0	0.33	1	0.33	1	0.33	-1.37	6.67	0.37
Telomere	O15091	PRORP	2|0|0|0|0|0	2	0.33	6	0|0|0|0	0.32	0.96	0.32	0.96	0.32	-1.37	3.33	0.44
Telomere	O15111	CHUK	7|1|1|1|0|1	11	1.83	6	0|0|0|4	0.3	0.89	0.3	0.89	0.3	-3.82	1.83	0.5
Telomere	O15116	LSM1	0|1|0|1|0|0	2	0.33	6	0|0|0|0	0	0	0	0	0	-1.37	3.33	0.55
Telomere	O15126	SCAMP1	2|1|0|0|0|0	3	0.5	6	0|0|0|0	0.32	0.96	0.32	0.96	0.32	-1.37	5	0.44
Telomere	O15143	ARPC1B	1|0|0|0|0|1	2	0.33	6	0|0|0|0	0	0	0	0	0	-1.37	3.33	0.55
Telomere	O15144	ARPC2	7|3|1|2|0|1	14	2.33	6	1|1|0|2	0.54	0.99	0.54	0.99	0.54	-4.4	2.33	0.25
Telomere	O15145	ARPC3	2|1|2|2|1|2	10	1.67	6	1|0|0|2	0.33	0.33	0.33	0.33	0.33	-2.11	2.22	0.39
Telomere	O15160	POLR1C	6|4|0|1|0|1	12	2	6	0|0|0|2	0.62	0.97	0.62	0.97	0.62	-2.91	4	0.21
Telomere	O15164	TRIM24	2|1|1|0|0|0	4	0.67	6	0|0|0|0	0.32	0.96	0.32	0.96	0.32	-1.37	6.67	0.44
Telomere	O15173	PGRMC2	0|1|0|0|0|0	1	0.17	6	0|0|0|0	0	0	0	0	0	-1.37	1.67	0.55
Telomere	O15212	PFDN6	0|3|1|1|1|2	8	1.33	6	0|0|0|2	0.45	0.77	0.45	0.77	0.45	-2.91	2.67	0.28
Telomere	O15213	WDR46	2|0|0|0|0|1	3	0.5	6	0|0|0|4	0.1	0.3	0.1	0.3	0.1	-3.82	0.5	0.53
Telomere	O15226	NKRF	5|5|0|0|0|2	12	2	6	0|0|0|3	0.72	0.86	0.72	0.86	0.72	-3.95	2.67	0.1
Telomere	O15228	GNPAT	3|0|0|0|0|0	3	0.5	6	0|0|0|0	0.33	0.99	0.33	0.99	0.33	-1.37	5	0.4
Telomere	O15231	ZNF185	4|0|0|0|0|0	4	0.67	6	0|0|0|0	0.33	1	0.33	1	0.33	-1.37	6.67	0.37
Telomere	O15258	RER1	1|0|0|0|0|0	1	0.17	6	0|0|0|0	0	0	0	0	0	-1.37	1.67	0.55
Telomere	O15260	SURF4	4|0|0|0|0|1	5	0.83	6	0|0|0|0	0.33	1	0.33	1	0.33	-1.37	8.33	0.37
Telomere	O15264	MAPK13	0|1|2|2|0|0	5	0.83	6	2|0|0|2	0.12	0.18	0.12	0.18	0.12	-4.37	0.83	0.53
Telomere	O15269	SPTLC1	2|0|0|0|1|0	3	0.5	6	0|0|0|2	0.19	0.57	0.19	0.57	0.19	-2.91	1	0.52
Telomere	O15270	SPTLC2	2|0|0|1|0|0	3	0.5	6	0|0|0|1	0.26	0.79	0.26	0.79	0.26	-1.91	2	0.5
Telomere	O15287	FANCG	2|0|0|0|0|0	2	0.33	6	0|0|0|0	0.32	0.96	0.32	0.96	0.32	-1.37	3.33	0.44
Telomere	O15294	OGT	5|7|0|1|0|0	13	2.17	6	1|0|0|2	0.65	1	0.65	1	0.65	-3.71	2.89	0.18
Telomere	O15297	PPM1D	1|1|0|0|0|0	2	0.33	6	0|0|0|0	0	0	0	0	0	-1.37	3.33	0.55
Telomere	O15305	PMM2	4|1|0|0|0|1	6	1	6	0|0|0|0	0.33	1	0.33	1	0.33	-1.37	10	0.37
Telomere	O15318	POLR3G	0|1|0|1|0|0	2	0.33	6	0|0|0|0	0	0	0	0	0	-1.37	3.33	0.55
Telomere	O15327	INPP4B	1|0|0|0|0|0	1	0.17	6	0|0|0|1	0	0	0	0	0	-1.91	0.67	0.55
Telomere	O15344	MID1	3|0|0|0|0|0	3	0.5	6	0|0|0|0	0.33	0.99	0.33	0.99	0.33	-1.37	5	0.4
Telomere	O15347	HMGB3	1|4|1|1|1|2	10	1.67	6	1|0|0|1	0.49	0.95	0.49	0.95	0.49	-1.2	3.33	0.26
Telomere	O15355	PPM1G	10|10|3|3|4|5	35	5.83	6	1|0|0|3	0.92	0.99	0.92	0.99	0.92	-0.16	5.83	0.02
Telomere	O15357	INPPL1	5|0|0|0|0|0	5	0.83	6	0|0|0|0	0.33	1	0.33	1	0.33	-1.37	8.33	0.35
Telomere	O15360	FANCA	6|0|0|0|0|0	6	1	6	0|0|0|2	0.32	0.97	0.32	0.97	0.32	-2.91	2	0.43
Telomere	O15371	EIF3D	18|5|4|3|1|7	38	6.33	6	2|0|0|6	0.64	0.98	0.64	0.98	0.64	-5.91	3.17	0.19
Telomere	O15372	EIF3H	7|2|1|1|1|6	18	3	6	1|0|0|2	0.77	1	0.77	1	0.77	-2.11	4	0.08
Telomere	O15379	HDAC3	0|1|0|0|0|1	2	0.33	6	0|0|0|0	0	0	0	0	0	-1.37	3.33	0.55
Telomere	O15381	NVL	5|0|0|0|0|0	5	0.83	6	0|0|0|0	0.33	1	0.33	1	0.33	-1.37	8.33	0.35
Telomere	O15382	BCAT2	0|1|1|0|1|2	5	0.83	6	1|0|0|0	0.26	0.79	0.26	0.79	0.26	-1.91	3.33	0.5
Telomere	O15397	IPO8	6|1|0|1|0|0	8	1.33	6	1|0|0|1	0.33	1	0.33	1	0.33	-2.81	2.67	0.39
Telomere	O15400	STX7	3|1|0|0|0|0	4	0.67	6	0|0|0|0	0.33	0.99	0.33	0.99	0.33	-1.37	6.67	0.4
Telomere	O15427	SLC16A3	0|3|1|1|0|1	6	1	6	0|0|0|0	0.33	0.99	0.33	0.99	0.33	-1.37	10	0.4
Telomere	O15439	ABCC4	0|0|0|0|0|1	1	0.17	6	0|0|0|0	0	0	0	0	0	-1.37	1.67	0.55
Telomere	O15446	POLR1G	1|3|0|2|1|2	9	1.5	6	0|0|0|2	0.64	0.77	0.64	0.77	0.64	-2.91	3	0.21
Telomere	O15479	MAGEB2	2|3|1|0|0|4	10	1.67	6	2|0|0|1	0.61	0.86	0.61	0.86	0.61	-3.71	2.22	0.22
Telomere	O15498	YKT6	1|2|1|1|0|3	8	1.33	6	0|0|0|2	0.45	0.77	0.45	0.77	0.45	-2.91	2.67	0.28
Telomere	O15504	NUP42	2|0|0|0|0|0	2	0.33	6	0|0|0|4	0.1	0.3	0.1	0.3	0.1	-3.82	0.33	0.53
Telomere	O15511	ARPC5	0|0|0|0|0|1	1	0.17	6	0|0|0|0	0	0	0	0	0	-1.37	1.67	0.55
Telomere	O15514	POLR2D	0|4|0|0|0|1	5	0.83	6	0|0|0|0	0.33	1	0.33	1	0.33	-1.37	8.33	0.37
Telomere	O15530	PDPK1	1|0|0|0|0|0	1	0.17	6	0|0|0|0	0	0	0	0	0	-1.37	1.67	0.55
Telomere	O43143	DHX15	16|24|12|11|10|14	87	14.5	6	7|0|0|17	0.32	0.81	0.32	0.81	0.32	-7.1	2.42	0.49
Telomere	O43148	RNMT	3|2|0|0|0|1	6	1	6	0|0|0|0	0.65	0.99	0.65	0.99	0.65	-1.37	10	0.18
Telomere	O43149	ZZEF1	3|0|0|0|0|0	3	0.5	6	0|0|0|0	0.33	0.99	0.33	0.99	0.33	-1.37	5	0.4
Telomere	O43156	TTI1	8|0|0|0|0|0	8	1.33	6	0|0|0|1	0.33	1	0.33	1	0.33	-1.91	5.33	0.33
Telomere	O43159	RRP8	0|0|0|0|0|1	1	0.17	6	0|0|0|0	0	0	0	0	0	-1.37	1.67	0.55
Telomere	O43166	SIPA1L1	2|0|0|0|0|0	2	0.33	6	0|0|0|0	0.32	0.96	0.32	0.96	0.32	-1.37	3.33	0.44
Telomere	O43169	CYB5B	3|1|1|1|0|2	8	1.33	6	0|0|0|0	0.65	0.99	0.65	0.99	0.65	-1.37	13.33	0.18
Telomere	O43172	PRPF4	4|7|2|2|1|2	18	3	6	1|0|0|2	0.73	1	0.73	1	0.73	-2.11	4	0.1
Telomere	O43175	PHGDH	10|4|4|3|3|7	31	5.17	6	3|0|0|12	0.1	0.26	0.1	0.26	0.1	-9.02	1.38	0.53
Telomere	O43181	NDUFS4	0|1|0|0|0|1	2	0.33	6	0|0|0|0	0	0	0	0	0	-1.37	3.33	0.55
Telomere	O43237	DYNC1LI2	2|0|0|0|1|0	3	0.5	6	1|0|0|0	0.26	0.79	0.26	0.79	0.26	-1.91	2	0.5
Telomere	O43242	PSMD3	10|11|2|5|2|5	35	5.83	6	0|0|0|1	1	1	1	1	1	1.35	23.33	0
Telomere	O43251	RBFOX2	0|3|2|1|0|1	7	1.17	6	0|0|0|0	0.65	0.99	0.65	0.99	0.65	-1.37	11.67	0.18
Telomere	O43252	PAPSS1	9|6|1|2|0|4	22	3.67	6	0|0|0|1	1	1	1	1	1	-1.91	14.67	0
Telomere	O43264	ZW10	11|1|0|0|0|0	12	2	6	1|0|0|1	0.33	1	0.33	1	0.33	-2.81	4	0.33
Telomere	O43290	SART1	11|13|4|3|1|4	36	6	6	3|0|0|2	0.84	1	0.84	1	0.84	-3.75	4.8	0.06
Telomere	O43293	DAPK3	1|0|0|0|0|0	1	0.17	6	0|0|0|0	0	0	0	0	0	-1.37	1.67	0.55
Telomere	O43301	HSPA12A	3|0|0|0|0|0	3	0.5	6	0|0|0|0	0.33	0.99	0.33	0.99	0.33	-1.37	5	0.4
Telomere	O43303	CCP110	1|0|0|0|0|0	1	0.17	6	0|0|0|0	0	0	0	0	0	-1.37	1.67	0.55
Telomere	O43314	PPIP5K2	2|0|0|0|0|0	2	0.33	6	0|0|0|1	0.26	0.79	0.26	0.79	0.26	-1.91	1.33	0.5
Telomere	O43318	MAP3K7	5|0|0|0|0|0	5	0.83	6	0|0|0|0	0.33	1	0.33	1	0.33	-1.37	8.33	0.35
Telomere	O43324	EEF1E1	3|0|0|0|0|0	3	0.5	6	0|0|0|0	0.33	0.99	0.33	0.99	0.33	-1.37	5	0.4
Telomere	O43379	WDR62	3|0|0|0|0|0	3	0.5	6	0|0|0|0	0.33	0.99	0.33	0.99	0.33	-1.37	5	0.4
Telomere	O43390	HNRNPR	15|16|17|19|17|15	99	16.5	6	3|0|0|6	0.98	0.99	0.98	0.99	0.98	3.14	7.33	0.01
Telomere	O43395	PRPF3	3|8|0|1|2|7	21	3.5	6	0|0|0|2	0.92	0.99	0.92	0.99	0.92	-2.91	7	0.03
Telomere	O43396	TXNL1	3|5|3|3|1|1	16	2.67	6	0|0|0|4	0.61	0.77	0.61	0.77	0.61	-2.41	2.67	0.21
Telomere	O43399	TPD52L2	2|1|0|0|2|3	8	1.33	6	0|0|0|2	0.64	0.77	0.64	0.77	0.64	-2.91	2.67	0.21
Telomere	O43402	EMC8	1|0|0|0|0|0	1	0.17	6	0|0|0|0	0	0	0	0	0	-1.37	1.67	0.55
Telomere	O43422	THAP12	1|1|0|0|0|0	2	0.33	6	0|0|0|0	0	0	0	0	0	-1.37	3.33	0.55
Telomere	O43426	SYNJ1	1|0|0|0|0|0	1	0.17	6	0|0|0|0	0	0	0	0	0	-1.37	1.67	0.55
Telomere	O43432	EIF4G3	3|0|0|0|0|0	3	0.5	6	0|0|0|0	0.33	0.99	0.33	0.99	0.33	-1.37	5	0.4
Telomere	O43447	PPIH	3|5|1|0|1|1	11	1.83	6	1|0|0|0	0.65	1	0.65	1	0.65	-1.91	7.33	0.19
Telomere	O43488	AKR7A2	1|2|1|1|1|1	7	1.17	6	1|0|0|2	0.11	0.33	0.11	0.33	0.11	-2.11	1.56	0.53
Telomere	O43491	EPB41L2	13|1|0|1|0|0	15	2.5	6	0|0|0|0	0.33	1	0.33	1	0.33	-1.37	25	0.32
Telomere	O43502	RAD51C	1|0|0|0|0|0	1	0.17	6	0|0|0|0	0	0	0	0	0	-1.37	1.67	0.55
Telomere	O43583	DENR	2|0|0|0|0|0	2	0.33	6	0|0|0|1	0.26	0.79	0.26	0.79	0.26	-1.91	1.33	0.5
Telomere	O43592	XPOT	8|1|0|0|0|0	9	1.5	6	0|0|0|2	0.33	0.99	0.33	0.99	0.33	-2.91	3	0.43
Telomere	O43615	TIMM44	3|3|4|4|1|4	19	3.17	6	2|0|0|1	0.86	0.86	0.86	0.86	0.86	-2.11	4.22	0.05
Telomere	O43617	TRAPPC3	0|1|1|1|0|0	3	0.5	6	0|0|0|3	0	0	0	0	0	-3.95	0.67	0.55
Telomere	O43660	PLRG1	4|10|1|0|0|0	15	2.5	6	0|0|0|0	0.67	1	0.67	1	0.67	-1.37	25	0.14
Telomere	O43663	PRC1	3|1|0|0|0|0	4	0.67	6	0|0|0|0	0.33	0.99	0.33	0.99	0.33	-1.37	6.67	0.4
Telomere	O43665	RGS10	0|4|0|0|0|0	4	0.67	6	0|0|0|0	0.33	1	0.33	1	0.33	-1.37	6.67	0.37
Telomere	O43670	ZNF207	3|4|1|2|1|2	13	2.17	6	1|0|0|1	0.76	0.95	0.76	0.95	0.76	-1.2	4.33	0.08
Telomere	O43674	NDUFB5	0|0|1|0|0|0	1	0.17	6	0|0|0|0	0	0	0	0	0	-1.37	1.67	0.55
Telomere	O43676	NDUFB3	0|0|0|0|0|1	1	0.17	6	0|0|0|0	0	0	0	0	0	-1.37	1.67	0.55
Telomere	O43681	GET3	1|3|1|1|0|1	7	1.17	6	1|0|0|2	0.21	0.64	0.21	0.64	0.21	-3.71	1.56	0.52
Telomere	O43683	BUB1	1|0|0|0|0|0	1	0.17	6	0|0|0|1	0	0	0	0	0	-1.91	0.67	0.55
Telomere	O43684	BUB3	7|6|2|2|1|2	20	3.33	6	2|0|0|0	0.84	0.99	0.84	0.99	0.84	-0.86	6.67	0.06
Telomere	O43707	ACTN4	49|33|23|22|17|37	181	30.17	6	13|1|4|39	0.09	0.25	0.09	0.25	0.09	-25.18	2.12	0.53
Telomere	O43709	BUD23	2|0|0|0|0|0	2	0.33	6	0|0|0|0	0.32	0.96	0.32	0.96	0.32	-1.37	3.33	0.44
Telomere	O43719	HTATSF1	2|11|2|1|1|0	17	2.83	6	0|0|0|0	0.97	1	0.97	1	0.97	-1.37	28.33	0.01
Telomere	O43747	AP1G1	16|2|2|4|1|2	27	4.5	6	3|0|0|12	0.28	0.83	0.28	0.83	0.28	-12.72	1.2	0.5
Telomere	O43760	SYNGR2	0|1|0|1|0|0	2	0.33	6	0|0|0|0	0	0	0	0	0	-1.37	3.33	0.55
Telomere	O43765	SGTA	1|0|0|0|0|0	1	0.17	6	0|0|0|0	0	0	0	0	0	-1.37	1.67	0.55
Telomere	O43776	NARS1	11|6|3|5|5|11	41	6.83	6	3|0|1|15	0.04	0.06	0.04	0.06	0.04	-12.58	1.44	0.54
Telomere	O43795	MYO1B	11|0|0|0|0|0	11	1.83	6	0|0|0|1	0.33	1	0.33	1	0.33	-1.91	7.33	0.32
Telomere	O43805	SSNA1	0|1|0|0|0|0	1	0.17	6	0|0|0|0	0	0	0	0	0	-1.37	1.67	0.55
Telomere	O43809	NUDT21	2|10|2|2|4|1	21	3.5	6	1|0|0|0	0.93	1	0.93	1	0.93	-0.3	14	0.02
Telomere	O43813	LANCL1	2|2|0|0|0|0	4	0.67	6	0|0|0|0	0.64	0.96	0.64	0.96	0.64	-1.37	6.67	0.2
Telomere	O43815	STRN	7|0|0|0|0|0	7	1.17	6	0|0|0|0	0.33	1	0.33	1	0.33	-1.37	11.67	0.33
Telomere	O43818	RRP9	4|2|0|1|0|0	7	1.17	6	0|0|0|3	0.41	0.77	0.41	0.77	0.41	-3.95	1.56	0.29
Telomere	O43823	AKAP8	2|3|0|0|1|1	7	1.17	6	0|0|0|0	0.65	0.99	0.65	0.99	0.65	-1.37	11.67	0.18
Telomere	O43837	IDH3B	0|2|1|2|2|1	8	1.33	6	0|0|0|0	0.96	0.96	0.96	0.96	0.96	-1.37	13.33	0.02
Telomere	O43847	NRDC	3|2|0|0|0|0	5	0.83	6	2|0|0|3	0.13	0.28	0.13	0.28	0.13	-5.38	0.67	0.53
Telomere	O43852	CALU	0|3|2|3|0|3	11	1.83	6	0|0|0|0	0.99	0.99	0.99	0.99	0.99	-1.37	18.33	0
Telomere	O43865	AHCYL1	3|1|0|0|0|0	4	0.67	6	0|0|0|0	0.33	0.99	0.33	0.99	0.33	-1.37	6.67	0.4
Telomere	O43896	KIF1C	2|0|0|0|0|0	2	0.33	6	0|0|0|2	0.19	0.57	0.19	0.57	0.19	-2.91	0.67	0.52
Telomere	O43909	EXTL3	1|0|0|0|0|0	1	0.17	6	0|0|0|0	0	0	0	0	0	-1.37	1.67	0.55
Telomere	O43913	ORC5	2|0|0|0|0|0	2	0.33	6	0|0|0|0	0.32	0.96	0.32	0.96	0.32	-1.37	3.33	0.44
Telomere	O43929	ORC4	4|2|0|0|0|1	7	1.17	6	0|0|0|1	0.59	0.99	0.59	0.99	0.59	-1.91	4.67	0.22
Telomere	O43933	PEX1	3|0|0|0|1|0	4	0.67	6	0|0|0|0	0.33	0.99	0.33	0.99	0.33	-1.37	6.67	0.4
Telomere	O60216	RAD21	11|1|5|4|0|2	23	3.83	6	1|0|0|1	0.98	1	0.98	1	0.98	-2.81	7.67	0.01
Telomere	O60231	DHX16	5|4|3|2|0|1	15	2.5	6	1|0|0|3	0.64	0.79	0.64	0.79	0.64	-4.16	2.5	0.2
Telomere	O60232	ZNRD2	1|2|0|1|0|1	5	0.83	6	0|0|0|2	0.19	0.57	0.19	0.57	0.19	-2.91	1.67	0.52
Telomere	O60244	MED14	7|1|0|0|0|0	8	1.33	6	0|0|0|0	0.33	1	0.33	1	0.33	-1.37	13.33	0.33
Telomere	O60256	PRPSAP2	1|0|0|0|1|1	3	0.5	6	0|0|0|2	0	0	0	0	0	-2.91	1	0.55
Telomere	O60264	SMARCA5	22|13|5|4|4|6	54	9	6	2|0|0|1	1	1	1	1	1	1.79	12	0
Telomere	O60271	SPAG9	11|0|0|2|0|0	13	2.17	6	0|0|0|2	0.52	1	0.52	1	0.52	-2.91	4.33	0.25
Telomere	O60282	KIF5C	1|0|0|0|0|0	1	0.17	6	0|0|0|0	0	0	0	0	0	-1.37	1.67	0.55
Telomere	O60287	URB1	13|1|0|0|1|2	17	2.83	6	0|0|0|3	0.48	1	0.48	1	0.48	-3.95	3.78	0.27
Telomere	O60293	ZFC3H1	7|3|0|0|0|0	10	1.67	6	0|0|0|0	0.66	1	0.66	1	0.66	-1.37	16.67	0.15
Telomere	O60299	LZTS3	0|0|0|0|0|1	1	0.17	6	0|0|0|0	0	0	0	0	0	-1.37	1.67	0.55
Telomere	O60306	AQR	11|5|0|2|1|2	21	3.5	6	0|0|0|0	0.99	1	0.99	1	0.99	-1.37	35	0
Telomere	O60313	OPA1	3|0|0|0|0|0	3	0.5	6	0|0|0|0	0.33	0.99	0.33	0.99	0.33	-1.37	5	0.4
Telomere	O60318	MCM3AP	1|1|0|0|0|0	2	0.33	6	0|0|0|4	0	0	0	0	0	-3.82	0.33	0.55
Telomere	O60333	KIF1B	9|0|0|0|0|0	9	1.5	6	0|0|0|0	0.33	1	0.33	1	0.33	-1.37	15	0.32
Telomere	O60341	KDM1A	14|10|2|1|2|1	30	5	6	0|0|0|1	0.93	1	0.93	1	0.93	-0.3	20	0.02
Telomere	O60343	TBC1D4	6|0|1|1|1|2	11	1.83	6	0|0|0|1	0.6	1	0.6	1	0.6	-1.91	7.33	0.22
Telomere	O60437	PPL	7|0|0|0|0|0	7	1.17	6	0|0|0|7	0.25	0.75	0.25	0.75	0.25	-7.19	0.67	0.51
Telomere	O60488	ACSL4	5|0|0|0|1|1	7	1.17	6	0|0|0|0	0.33	1	0.33	1	0.33	-1.37	11.67	0.35
Telomere	O60493	SNX3	0|0|0|0|0|2	2	0.33	6	0|0|0|0	0.32	0.96	0.32	0.96	0.32	-1.37	3.33	0.44
Telomere	O60499	STX10	4|0|0|0|0|0	4	0.67	6	0|0|0|0	0.33	1	0.33	1	0.33	-1.37	6.67	0.37
Telomere	O60502	OGA	6|1|2|0|2|1	12	2	6	1|0|0|8	0.13	0.39	0.13	0.39	0.13	-8.95	0.89	0.53
Telomere	O60506	SYNCRIP	8|9|9|12|12|9	59	9.83	6	5|0|0|6	0.76	0.85	0.76	0.85	0.76	-0.34	3.58	0.09
Telomere	O60507	TPST1	1|0|0|0|0|0	1	0.17	6	0|0|0|0	0	0	0	0	0	-1.37	1.67	0.55
Telomere	O60508	CDC40	4|5|0|0|1|1	11	1.83	6	0|0|0|0	0.67	1	0.67	1	0.67	-1.37	18.33	0.14
Telomere	O60518	RANBP6	2|0|0|0|0|0	2	0.33	6	0|0|0|0	0.32	0.96	0.32	0.96	0.32	-1.37	3.33	0.44
Telomere	O60524	NEMF	6|0|0|0|0|0	6	1	6	0|0|0|1	0.33	1	0.33	1	0.33	-1.91	4	0.36
Telomere	O60563	CCNT1	4|3|0|0|0|0	7	1.17	6	0|0|0|0	0.66	1	0.66	1	0.66	-1.37	11.67	0.15
Telomere	O60566	BUB1B	6|0|0|0|0|0	6	1	6	0|0|0|0	0.33	1	0.33	1	0.33	-1.37	10	0.34
Telomere	O60568	PLOD3	3|0|0|0|0|0	3	0.5	6	0|0|0|0	0.33	0.99	0.33	0.99	0.33	-1.37	5	0.4
Telomere	O60573	EIF4E2	0|0|0|0|7|0	7	1.17	6	0|0|0|0	0.33	1	0.33	1	0.33	-1.37	11.67	0.33
Telomere	O60610	DIAPH1	39|1|1|1|0|1	43	7.17	6	1|0|0|9	0.33	1	0.33	1	0.33	-10.07	2.87	0.39
Telomere	O60645	EXOC3	2|0|0|0|0|0	2	0.33	6	0|0|0|2	0.19	0.57	0.19	0.57	0.19	-2.91	0.67	0.52
Telomere	O60664	PLIN3	7|11|2|2|3|3	28	4.67	6	3|0|0|7	0.41	0.83	0.41	0.83	0.41	-6.34	1.87	0.29
Telomere	O60678	PRMT3	1|0|0|0|0|0	1	0.17	6	0|0|0|1	0	0	0	0	0	-1.91	0.67	0.55
Telomere	O60684	KPNA6	5|0|0|0|0|0	5	0.83	6	0|0|0|1	0.33	1	0.33	1	0.33	-1.91	3.33	0.39
Telomere	O60701	UGDH	11|10|2|3|2|7	35	5.83	6	1|0|0|6	0.84	0.91	0.84	0.91	0.84	-3.47	3.33	0.06
Telomere	O60716	CTNND1	13|8|3|3|2|4	33	5.5	6	2|0|0|8	0.49	0.88	0.49	0.88	0.49	-6.23	2.2	0.26
Telomere	O60739	EIF1B	1|1|0|1|1|1	5	0.83	6	0|0|0|1	0	0	0	0	0	-1.91	3.33	0.55
Telomere	O60749	SNX2	3|1|0|0|0|2	6	1	6	0|0|0|3	0.36	0.65	0.36	0.65	0.36	-3.95	1.33	0.3
Telomere	O60763	USO1	15|2|0|0|0|1	18	3	6	3|0|0|14	0.22	0.66	0.22	0.66	0.22	-17.37	0.71	0.52
Telomere	O60783	MRPS14	0|0|0|0|0|2	2	0.33	6	0|0|0|0	0.32	0.96	0.32	0.96	0.32	-1.37	3.33	0.44
Telomere	O60784	TOM1	4|0|0|0|0|0	4	0.67	6	0|0|0|0	0.33	1	0.33	1	0.33	-1.37	6.67	0.37
Telomere	O60814	H2BC12	0|1|1|1|0|0	3	0.5	6	0|0|0|0	0	0	0	0	0	-1.37	5	0.55
Telomere	O60825	PFKFB2	2|1|0|0|0|0	3	0.5	6	0|0|0|0	0.32	0.96	0.32	0.96	0.32	-1.37	5	0.44
Telomere	O60826	CCDC22	1|1|1|0|0|1	4	0.67	6	0|0|0|2	0	0	0	0	0	-2.91	1.33	0.55
Telomere	O60828	PQBP1	1|2|0|0|0|0	3	0.5	6	0|0|0|0	0.32	0.96	0.32	0.96	0.32	-1.37	5	0.44
Telomere	O60832	DKC1	9|2|0|0|0|1	12	2	6	1|0|0|1	0.51	1	0.51	1	0.51	-2.81	4	0.26
Telomere	O60841	EIF5B	20|6|3|6|3|8	46	7.67	6	6|0|0|6	0.44	0.97	0.44	0.97	0.44	-6.56	2.56	0.28
Telomere	O60858	TRIM13	0|1|0|0|0|0	1	0.17	6	0|0|0|1	0	0	0	0	0	-1.91	0.67	0.55
Telomere	O60869	EDF1	0|1|0|0|0|0	1	0.17	6	0|0|0|0	0	0	0	0	0	-1.37	1.67	0.55
Telomere	O60870	KIN	1|1|0|0|0|0	2	0.33	6	0|0|0|0	0	0	0	0	0	-1.37	3.33	0.55
Telomere	O60884	DNAJA2	6|3|0|1|2|4	16	2.67	6	1|0|0|3	0.67	0.88	0.67	0.88	0.67	-4.16	2.67	0.12
Telomere	O60885	BRD4	3|0|0|0|0|0	3	0.5	6	0|0|0|0	0.33	0.99	0.33	0.99	0.33	-1.37	5	0.4
Telomere	O60888	CUTA	1|0|0|0|0|0	1	0.17	6	0|0|0|0	0	0	0	0	0	-1.37	1.67	0.55
Telomere	O60934	NBN	0|2|0|0|0|0	2	0.33	6	0|0|0|0	0.32	0.96	0.32	0.96	0.32	-1.37	3.33	0.44
Telomere	O60942	RNGTT	3|3|0|0|0|1	7	1.17	6	0|0|0|0	0.66	0.99	0.66	0.99	0.66	-1.37	11.67	0.16
Telomere	O75044	SRGAP2	6|0|0|0|0|0	6	1	6	0|0|0|0	0.33	1	0.33	1	0.33	-1.37	10	0.34
Telomere	O75083	WDR1	4|5|4|3|1|6	23	3.83	6	4|0|0|11	0	0.01	0	0.01	0	-12.8	1.02	0.54
Telomere	O75113	N4BP1	4|0|0|0|0|0	4	0.67	6	0|0|0|0	0.33	1	0.33	1	0.33	-1.37	6.67	0.37
Telomere	O75116	ROCK2	20|4|2|1|2|3	32	5.33	6	0|0|0|6	0.57	0.99	0.57	0.99	0.57	-4.26	3.56	0.24
Telomere	O75122	CLASP2	10|1|0|0|0|0	11	1.83	6	0|0|0|0	0.33	1	0.33	1	0.33	-1.37	18.33	0.32
Telomere	O75127	PTCD1	1|0|0|0|0|0	1	0.17	6	1|0|0|0	0	0	0	0	0	-1.91	0.67	0.55
Telomere	O75131	CPNE3	5|8|4|3|2|7	29	4.83	6	4|0|1|3	0.62	0.86	0.62	0.86	0.62	-4.92	2.42	0.21
Telomere	O75146	HIP1R	16|0|1|2|1|1	21	3.5	6	1|0|0|7	0.32	0.95	0.32	0.95	0.32	-7.84	1.75	0.48
Telomere	O75150	RNF40	9|6|0|1|0|2	18	3	6	1|0|0|2	0.77	1	0.77	1	0.77	-3.71	4	0.08
Telomere	O75152	ZC3H11A	3|6|1|3|0|1	14	2.33	6	0|0|0|0	1	1	1	1	1	-1.37	23.33	0
Telomere	O75153	CLUH	17|0|2|2|1|5	27	4.5	6	1|0|0|8	0.39	0.95	0.39	0.95	0.39	-8.95	2	0.29
Telomere	O75164	KDM4A	0|1|0|0|0|0	1	0.17	6	0|0|0|0	0	0	0	0	0	-1.37	1.67	0.55
Telomere	O75165	DNAJC13	19|0|0|0|0|0	19	3.17	6	0|0|0|7	0.33	0.98	0.33	0.98	0.33	-7.19	1.81	0.43
Telomere	O75170	PPP6R2	2|1|0|0|0|0	3	0.5	6	0|0|0|0	0.32	0.96	0.32	0.96	0.32	-1.37	5	0.44
Telomere	O75175	CNOT3	1|0|0|0|0|0	1	0.17	6	0|0|0|2	0	0	0	0	0	-2.91	0.33	0.55
Telomere	O75179	ANKRD17	6|0|0|0|0|0	6	1	6	0|0|0|0	0.33	1	0.33	1	0.33	-1.37	10	0.34
Telomere	O75182	SIN3B	1|1|0|0|0|0	2	0.33	6	0|0|0|0	0	0	0	0	0	-1.37	3.33	0.55
Telomere	O75190	DNAJB6	0|2|0|0|0|0	2	0.33	6	0|0|0|1	0.26	0.79	0.26	0.79	0.26	-1.91	1.33	0.5
Telomere	O75223	GGCT	0|0|1|0|0|0	1	0.17	6	1|1|1|0	0	0	0	0	0	-3.71	0.22	0.55
Telomere	O75306	NDUFS2	0|1|3|2|2|3	11	1.83	6	3|0|0|0	0.58	0.65	0.58	0.65	0.58	-3.95	2.44	0.23
Telomere	O75312	ZPR1	5|3|1|1|1|1	12	2	6	0|0|0|0	0.66	1	0.66	1	0.66	1.14	20	0.15
Telomere	O75330	HMMR	5|0|0|0|0|0	5	0.83	6	0|0|0|0	0.33	1	0.33	1	0.33	-1.37	8.33	0.35
Telomere	O75340	PDCD6	2|2|0|0|0|0	4	0.67	6	0|0|0|0	0.64	0.96	0.64	0.96	0.64	-1.37	6.67	0.2
Telomere	O75347	TBCA	1|4|1|0|1|1	8	1.33	6	0|0|0|0	0.33	1	0.33	1	0.33	-1.37	13.33	0.37
Telomere	O75348	ATP6V1G1	0|1|0|0|0|0	1	0.17	6	0|0|0|0	0	0	0	0	0	-1.37	1.67	0.55
Telomere	O75351	VPS4B	2|2|1|1|1|2	9	1.5	6	1|0|0|1	0.53	0.53	0.53	0.53	0.53	-1.2	3	0.25
Telomere	O75362	ZNF217	0|1|0|0|0|0	1	0.17	6	0|0|0|0	0	0	0	0	0	-1.37	1.67	0.55
Telomere	O75367	MACROH2A1	6|4|2|2|3|5	22	3.67	6	0|0|0|0	1	1	1	1	1	3.17	36.67	0
Telomere	O75369	FLNB	84|14|13|14|9|22	156	26	6	19|0|0|61	0.28	0.83	0.28	0.83	0.28	-59.85	1.3	0.5
Telomere	O75380	NDUFS6	0|1|0|0|1|1	3	0.5	6	0|0|0|0	0	0	0	0	0	-1.37	5	0.55
Telomere	O75381	PEX14	0|1|1|1|0|1	4	0.67	6	1|0|0|2	0	0	0	0	0	-3.71	0.89	0.55
Telomere	O75390	CS	2|6|8|10|4|7	37	6.17	6	8|1|2|2	0.25	0.49	0.25	0.49	0.25	-9.11	1.9	0.52
Telomere	O75391	SPAG7	0|2|0|0|0|0	2	0.33	6	0|0|0|0	0.32	0.96	0.32	0.96	0.32	-1.37	3.33	0.44
Telomere	O75396	SEC22B	8|1|1|1|2|2	15	2.5	6	1|0|0|3	0.47	0.97	0.47	0.97	0.47	-2.76	2.5	0.27
Telomere	O75400	PRPF40A	10|8|4|5|1|2	30	5	6	2|0|0|1	0.99	1	0.99	1	0.99	-2.11	6.67	0.01
Telomere	O75410	TACC1	2|0|0|0|0|0	2	0.33	6	0|0|0|1	0.26	0.79	0.26	0.79	0.26	-1.91	1.33	0.5
Telomere	O75419	CDC45	1|1|0|0|0|0	2	0.33	6	0|0|0|0	0	0	0	0	0	-1.37	3.33	0.55
Telomere	O75436	VPS26A	10|1|3|2|1|1	18	3	6	2|0|0|1	0.66	1	0.66	1	0.66	-2.11	4	0.17
Telomere	O75439	PMPCB	1|4|4|4|3|4	20	3.33	6	4|0|0|0	0.69	0.69	0.69	0.69	0.69	-2.41	3.33	0.11
Telomere	O75448	MED24	3|1|0|0|0|0	4	0.67	6	0|0|0|0	0.33	0.99	0.33	0.99	0.33	-1.37	6.67	0.4
Telomere	O75475	PSIP1	0|2|0|0|2|3	7	1.17	6	0|0|0|0	0.97	0.99	0.97	0.99	0.97	-1.37	11.67	0.01
Telomere	O75477	ERLIN1	2|0|0|0|0|1	3	0.5	6	0|0|0|0	0.32	0.96	0.32	0.96	0.32	-1.37	5	0.44
Telomere	O75489	NDUFS3	2|2|1|2|1|1	9	1.5	6	1|0|0|0	0.79	0.79	0.79	0.79	0.79	-0.3	6	0.07
Telomere	O75494	SRSF10	3|5|2|1|3|2	16	2.67	6	1|0|0|0	0.97	1	0.97	1	0.97	-0.3	10.67	0.01
Telomere	O75521	ECI2	1|0|0|1|0|0	2	0.33	6	1|0|0|0	0	0	0	0	0	-1.91	1.33	0.55
Telomere	O75525	KHDRBS3	0|2|1|0|0|0	3	0.5	6	0|0|0|0	0.32	0.96	0.32	0.96	0.32	-1.37	5	0.44
Telomere	O75528	TADA3	1|0|0|0|0|0	1	0.17	6	0|0|0|0	0	0	0	0	0	-1.37	1.67	0.55
Telomere	O75529	TAF5L	1|0|0|0|0|0	1	0.17	6	0|0|0|0	0	0	0	0	0	-1.37	1.67	0.55
Telomere	O75530	EED	0|2|0|0|0|1	3	0.5	6	0|0|0|0	0.32	0.96	0.32	0.96	0.32	-1.37	5	0.44
Telomere	O75531	BANF1	2|3|1|2|2|3	13	2.17	6	1|0|1|1	0.53	0.63	0.53	0.63	0.53	-2.1	2.89	0.25
Telomere	O75533	SF3B1	28|32|5|7|5|9	86	14.33	6	4|0|0|3	0.97	1	0.97	1	0.97	-0.3	8.19	0.01
Telomere	O75534	CSDE1	17|2|1|4|1|8	33	5.5	6	1|0|0|11	0.42	0.9	0.42	0.9	0.42	-9.38	1.83	0.29
Telomere	O75554	WBP4	0|1|0|1|0|0	2	0.33	6	0|0|0|0	0	0	0	0	0	-1.37	3.33	0.55
Telomere	O75582	RPS6KA5	1|1|0|0|0|0	2	0.33	6	0|0|0|0	0	0	0	0	0	-1.37	3.33	0.55
Telomere	O75592	MYCBP2	5|0|0|0|0|0	5	0.83	6	0|0|0|1	0.33	1	0.33	1	0.33	-1.91	3.33	0.39
Telomere	O75600	GCAT	0|1|0|0|0|0	1	0.17	6	0|0|0|0	0	0	0	0	0	-1.37	1.67	0.55
Telomere	O75607	NPM3	0|0|0|1|2|2	5	0.83	6	0|0|0|1	0.53	0.79	0.53	0.79	0.53	-1.91	3.33	0.25
Telomere	O75608	LYPLA1	0|1|0|0|0|1	2	0.33	6	0|0|0|1	0	0	0	0	0	-1.91	1.33	0.55
Telomere	O75616	ERAL1	1|0|0|1|0|0	2	0.33	6	1|0|0|0	0	0	0	0	0	-1.91	1.33	0.55
Telomere	O75643	SNRNP200	64|60|26|27|21|29	227	37.83	6	19|0|0|27	0.64	0.97	0.64	0.97	0.64	-12.1	3.29	0.2
Telomere	O75663	TIPRL	1|0|1|1|1|1	5	0.83	6	0|0|0|0	0	0	0	0	0	-1.37	8.33	0.55
Telomere	O75665	OFD1	3|0|0|0|0|0	3	0.5	6	0|0|0|0	0.33	0.99	0.33	0.99	0.33	-1.37	5	0.4
Telomere	O75674	TOM1L1	1|0|0|0|0|0	1	0.17	6	0|0|0|0	0	0	0	0	0	-1.37	1.67	0.55
Telomere	O75676	RPS6KA4	4|3|0|1|0|0	8	1.33	6	0|0|0|0	0.66	1	0.66	1	0.66	-1.37	13.33	0.15
Telomere	O75683	SURF6	2|1|0|1|0|0	4	0.67	6	0|0|0|0	0.32	0.96	0.32	0.96	0.32	-1.37	6.67	0.44
Telomere	O75688	PPM1B	1|0|0|0|0|0	1	0.17	6	0|0|0|0	0	0	0	0	0	-1.37	1.67	0.55
Telomere	O75691	UTP20	19|1|0|1|0|0	21	3.5	6	1|0|0|6	0.33	0.99	0.33	0.99	0.33	-7.32	2	0.43
Telomere	O75694	NUP155	19|4|1|1|0|6	31	5.17	6	3|0|0|21	0.14	0.42	0.14	0.42	0.14	-24.76	0.86	0.53
Telomere	O75717	WDHD1	17|8|1|0|0|0	26	4.33	6	1|0|0|2	0.67	1	0.67	1	0.67	-3.71	5.78	0.14
Telomere	O75718	CRTAP	0|0|0|1|0|0	1	0.17	6	0|0|0|0	0	0	0	0	0	-1.37	1.67	0.55
Telomere	O75746	SLC25A12	0|0|0|0|0|1	1	0.17	6	1|0|0|0	0	0	0	0	0	-1.91	0.67	0.55
Telomere	O75792	RNASEH2A	2|0|0|0|0|0	2	0.33	6	0|0|0|0	0.32	0.96	0.32	0.96	0.32	-1.37	3.33	0.44
Telomere	O75794	CDC123	3|0|0|0|0|1	4	0.67	6	0|0|0|1	0.32	0.95	0.32	0.95	0.32	-1.91	2.67	0.48
Telomere	O75808	CAPN15	1|0|0|0|0|0	1	0.17	6	0|0|0|0	0	0	0	0	0	-1.37	1.67	0.55
Telomere	O75817	POP7	0|1|0|0|0|0	1	0.17	6	0|0|0|0	0	0	0	0	0	-1.37	1.67	0.55
Telomere	O75818	RPP40	1|0|0|0|0|0	1	0.17	6	0|0|0|0	0	0	0	0	0	-1.37	1.67	0.55
Telomere	O75821	EIF3G	9|4|5|6|1|6	31	5.17	6	4|0|0|5	0.48	0.78	0.48	0.78	0.48	-7.1	2.3	0.27
Telomere	O75822	EIF3J	1|0|1|1|2|0	5	0.83	6	0|0|0|0	0.32	0.96	0.32	0.96	0.32	-1.37	8.33	0.44
Telomere	O75832	PSMD10	1|0|0|0|0|0	1	0.17	6	0|0|0|0	0	0	0	0	0	-1.37	1.67	0.55
Telomere	O75843	AP1G2	2|0|0|0|0|0	2	0.33	6	0|0|0|0	0.32	0.96	0.32	0.96	0.32	-1.37	3.33	0.44
Telomere	O75844	ZMPSTE24	1|1|0|1|0|3	6	1	6	1|0|0|3	0.15	0.46	0.15	0.46	0.15	-4.16	1	0.53
Telomere	O75874	IDH1	6|3|0|2|1|3	15	2.5	6	1|0|0|3	0.6	0.88	0.6	0.88	0.6	-4.16	2.5	0.22
Telomere	O75879	GATB	0|1|0|0|1|0	2	0.33	6	0|0|0|0	0	0	0	0	0	-1.37	3.33	0.55
Telomere	O75880	SCO1	0|1|0|0|0|0	1	0.17	6	0|0|0|0	0	0	0	0	0	-1.37	1.67	0.55
Telomere	O75886	STAM2	5|0|1|0|0|0	6	1	6	0|0|0|1	0.33	1	0.33	1	0.33	-1.91	4	0.39
Telomere	O75909	CCNK	2|3|1|2|1|2	11	1.83	6	1|0|0|1	0.63	0.81	0.63	0.81	0.63	-1.2	3.67	0.21
Telomere	O75912	DGKI	1|0|0|0|0|0	1	0.17	6	0|0|0|0	0	0	0	0	0	-1.37	1.67	0.55
Telomere	O75915	ARL6IP5	1|0|0|0|1|2	4	0.67	6	0|0|0|0	0.32	0.96	0.32	0.96	0.32	-1.37	6.67	0.44
Telomere	O75925	PIAS1	0|1|0|0|0|0	1	0.17	6	0|0|0|0	0	0	0	0	0	-1.37	1.67	0.55
Telomere	O75934	BCAS2	0|4|0|1|0|1	6	1	6	0|0|0|0	0.33	1	0.33	1	0.33	-1.37	10	0.37
Telomere	O75937	DNAJC8	3|2|0|1|1|2	9	1.5	6	0|0|0|0	0.97	0.99	0.97	0.99	0.97	-1.37	15	0.01
Telomere	O75940	SMNDC1	1|4|1|1|1|2	10	1.67	6	1|0|0|1	0.49	0.95	0.49	0.95	0.49	-1.2	3.33	0.26
Telomere	O75943	RAD17	0|1|0|0|0|0	1	0.17	6	0|0|0|0	0	0	0	0	0	-1.37	1.67	0.55
Telomere	O75947	ATP5PD	0|3|1|1|1|3	9	1.5	6	1|0|0|1	0.54	0.81	0.54	0.81	0.54	-2.81	3	0.24
Telomere	O75953	DNAJB5	0|0|0|1|0|0	1	0.17	6	0|0|0|0	0	0	0	0	0	-1.37	1.67	0.55
Telomere	O75962	TRIO	8|0|0|0|0|0	8	1.33	6	0|0|0|0	0.33	1	0.33	1	0.33	-1.37	13.33	0.33
Telomere	O75964	ATP5MG	0|2|2|1|1|1	7	1.17	6	0|0|0|0	0.64	0.96	0.64	0.96	0.64	-1.37	11.67	0.2
Telomere	O75976	CPD	3|1|0|0|0|1	5	0.83	6	0|0|0|0	0.33	0.99	0.33	0.99	0.33	-1.37	8.33	0.4
Telomere	O76003	GLRX3	6|3|2|3|0|2	16	2.67	6	1|0|0|4	0.48	0.79	0.48	0.79	0.48	-5.18	2.13	0.27
Telomere	O76015	KRT38	0|1|1|0|0|1	3	0.5	6	1|0|0|1	0	0	0	0	0	-2.81	1	0.55
Telomere	O76021	RSL1D1	5|8|4|5|2|5	29	4.83	6	5|0|0|11	0.01	0.03	0.01	0.03	0.01	-11.52	1.21	0.54
Telomere	O76024	WFS1	1|0|0|0|0|0	1	0.17	6	0|0|0|0	0	0	0	0	0	-1.37	1.67	0.55
Telomere	O76031	CLPX	5|2|5|4|3|4	23	3.83	6	5|0|0|0	0.68	0.72	0.68	0.72	0.68	-1.61	3.07	0.12
Telomere	O76054	SEC14L2	0|1|0|0|0|0	1	0.17	6	0|0|0|0	0	0	0	0	0	-1.37	1.67	0.55
Telomere	O76071	CIAO1	0|0|1|1|0|1	3	0.5	6	1|0|0|1	0	0	0	0	0	-2.81	1	0.55
Telomere	O76075	DFFB	0|1|0|0|1|1	3	0.5	6	0|0|0|0	0	0	0	0	0	-1.37	5	0.55
Telomere	O76094	SRP72	9|0|0|0|1|2	12	2	6	0|0|0|1	0.6	1	0.6	1	0.6	-1.91	8	0.22
Telomere	O94761	RECQL4	1|0|0|1|1|0	3	0.5	6	0|0|0|0	0	0	0	0	0	-1.37	5	0.55
Telomere	O94763	URI1	1|0|0|0|0|0	1	0.17	6	0|0|0|0	0	0	0	0	0	-1.37	1.67	0.55
Telomere	O94776	MTA2	6|3|1|2|1|3	16	2.67	6	0|0|0|3	0.73	0.91	0.73	0.91	0.73	-1.58	3.56	0.09
Telomere	O94804	STK10	2|0|0|0|0|0	2	0.33	6	0|0|0|0	0.32	0.96	0.32	0.96	0.32	-1.37	3.33	0.44
Telomere	O94808	GFPT2	1|0|0|0|0|0	1	0.17	6	0|0|0|0	0	0	0	0	0	-1.37	1.67	0.55
Telomere	O94819	KBTBD11	0|1|0|0|0|0	1	0.17	6	0|0|0|0	0	0	0	0	0	-1.37	1.67	0.55
Telomere	O94826	TOMM70	1|1|0|1|0|3	6	1	6	1|0|0|3	0.15	0.46	0.15	0.46	0.15	-4.16	1	0.53
Telomere	O94829	IPO13	1|0|0|0|0|0	1	0.17	6	0|0|0|0	0	0	0	0	0	-1.37	1.67	0.55
Telomere	O94830	DDHD2	1|0|0|0|0|0	1	0.17	6	0|0|0|0	0	0	0	0	0	-1.37	1.67	0.55
Telomere	O94832	MYO1D	3|0|0|0|0|0	3	0.5	6	0|0|0|0	0.33	0.99	0.33	0.99	0.33	-1.37	5	0.4
Telomere	O94842	TOX4	1|4|0|1|0|0	6	1	6	0|0|0|0	0.33	1	0.33	1	0.33	-1.37	10	0.37
Telomere	O94855	SEC24D	3|0|0|1|0|1	5	0.83	6	0|0|0|1	0.32	0.95	0.32	0.95	0.32	-1.91	3.33	0.48
Telomere	O94874	UFL1	5|0|0|0|1|0	6	1	6	0|0|0|0	0.33	1	0.33	1	0.33	-1.37	10	0.35
Telomere	O94888	UBXN7	2|2|0|1|1|1	7	1.17	6	0|0|0|0	0.64	0.96	0.64	0.96	0.64	-1.37	11.67	0.2
Telomere	O94901	SUN1	6|0|0|0|0|0	6	1	6	0|0|0|0	0.33	1	0.33	1	0.33	-1.37	10	0.34
Telomere	O94903	PLPBP	1|1|0|0|0|1	3	0.5	6	0|0|0|2	0	0	0	0	0	-2.91	1	0.55
Telomere	O94905	ERLIN2	3|1|0|0|1|2	7	1.17	6	0|0|0|1	0.58	0.95	0.58	0.95	0.58	-1.91	4.67	0.23
Telomere	O94906	PRPF6	19|14|2|2|1|5	43	7.17	6	3|0|0|4	0.8	1	0.8	1	0.8	-5.56	4.1	0.07
Telomere	O94913	PCF11	5|9|0|0|0|0	14	2.33	6	0|0|0|0	0.67	1	0.67	1	0.67	-1.37	23.33	0.13
Telomere	O94915	FRYL	18|1|0|0|0|0	19	3.17	6	0|0|0|4	0.33	1	0.33	1	0.33	-3.82	3.17	0.4
Telomere	O94916	NFAT5	0|2|0|0|0|0	2	0.33	6	0|0|0|0	0.32	0.96	0.32	0.96	0.32	-1.37	3.33	0.44
Telomere	O94919	ENDOD1	0|0|0|0|1|0	1	0.17	6	0|0|0|1	0	0	0	0	0	-1.91	0.67	0.55
Telomere	O94925	GLS	2|1|1|2|1|2	9	1.5	6	4|0|0|0	0.3	0.3	0.3	0.3	0.3	-2.41	1.5	0.5
Telomere	O94927	HAUS5	4|0|0|0|0|0	4	0.67	6	0|0|0|1	0.33	0.99	0.33	0.99	0.33	-1.91	2.67	0.43
Telomere	O94952	FBXO21	1|1|0|0|0|0	2	0.33	6	0|0|0|1	0	0	0	0	0	-1.91	1.33	0.55
Telomere	O94964	SOGA1	5|0|0|0|0|0	5	0.83	6	0|0|0|0	0.33	1	0.33	1	0.33	-1.37	8.33	0.35
Telomere	O94966	USP19	5|0|0|0|0|1	6	1	6	0|0|0|0	0.33	1	0.33	1	0.33	-1.37	10	0.35
Telomere	O94973	AP2A2	12|0|0|0|0|3	15	2.5	6	0|0|0|6	0.39	0.94	0.39	0.94	0.39	-6.07	1.67	0.29
Telomere	O94979	SEC31A	11|0|0|0|0|0	11	1.83	6	0|0|0|6	0.31	0.92	0.31	0.92	0.31	-6.07	1.22	0.49
Telomere	O94992	HEXIM1	3|4|1|1|0|0	9	1.5	6	0|0|0|0	0.66	1	0.66	1	0.66	-1.37	15	0.15
Telomere	O95059	RPP14	2|0|0|0|0|0	2	0.33	6	0|0|0|0	0.32	0.96	0.32	0.96	0.32	-1.37	3.33	0.44
Telomere	O95071	UBR5	13|6|0|0|0|1	20	3.33	6	0|0|0|0	0.67	1	0.67	1	0.67	-1.37	33.33	0.13
Telomere	O95104	SCAF4	1|1|0|0|0|0	2	0.33	6	0|0|0|0	0	0	0	0	0	-1.37	3.33	0.55
Telomere	O95140	MFN2	1|0|0|0|0|0	1	0.17	6	0|0|0|0	0	0	0	0	0	-1.37	1.67	0.55
Telomere	O95155	UBE4B	6|0|0|0|0|0	6	1	6	0|0|0|0	0.33	1	0.33	1	0.33	-1.37	10	0.34
Telomere	O95163	ELP1	17|1|0|0|0|0	18	3	6	1|0|0|5	0.33	0.99	0.33	0.99	0.33	-6.24	2	0.43
Telomere	O95168	NDUFB4	0|1|1|1|0|2	5	0.83	6	0|0|0|0	0.32	0.96	0.32	0.96	0.32	-1.37	8.33	0.44
Telomere	O95169	NDUFB8	1|0|0|0|0|0	1	0.17	6	0|0|0|0	0	0	0	0	0	-1.37	1.67	0.55
Telomere	O95202	LETM1	4|2|2|1|1|3	13	2.17	6	3|0|0|0	0.62	0.77	0.62	0.77	0.62	-1.58	2.89	0.21
Telomere	O95208	EPN2	1|0|0|0|0|0	1	0.17	6	0|0|0|0	0	0	0	0	0	-1.37	1.67	0.55
Telomere	O95218	ZRANB2	1|4|1|0|0|0	6	1	6	0|0|0|1	0.33	0.99	0.33	0.99	0.33	-1.91	4	0.43
Telomere	O95219	SNX4	3|0|0|0|0|0	3	0.5	6	0|0|0|0	0.33	0.99	0.33	0.99	0.33	-1.37	5	0.4
Telomere	O95232	LUC7L3	5|4|1|2|2|3	17	2.83	6	2|2|3|0	0.24	0.47	0.24	0.47	0.24	-5.7	1.62	0.52
Telomere	O95235	KIF20A	8|0|0|0|0|0	8	1.33	6	0|0|0|0	0.33	1	0.33	1	0.33	-1.37	13.33	0.33
Telomere	O95239	KIF4A	14|11|2|1|0|2	30	5	6	1|0|0|2	0.78	1	0.78	1	0.78	-3.71	6.67	0.08
Telomere	O95248	SBF1	1|0|0|0|0|0	1	0.17	6	0|0|0|1	0	0	0	0	0	-1.91	0.67	0.55
Telomere	O95251	KAT7	6|2|1|0|0|0	9	1.5	6	0|0|0|0	0.65	1	0.65	1	0.65	-1.37	15	0.17
Telomere	O95260	ATE1	0|2|0|0|0|0	2	0.33	6	0|0|0|0	0.32	0.96	0.32	0.96	0.32	-1.37	3.33	0.44
Telomere	O95299	NDUFA10	3|1|1|1|2|1	9	1.5	6	3|0|0|0	0.36	0.65	0.36	0.65	0.36	-1.58	2	0.3
Telomere	O95336	PGLS	1|0|0|0|0|0	1	0.17	6	0|0|0|2	0	0	0	0	0	-2.91	0.33	0.55
Telomere	O95340	PAPSS2	5|4|0|1|0|1	11	1.83	6	1|0|0|1	0.64	0.99	0.64	0.99	0.64	-2.81	3.67	0.19
Telomere	O95347	SMC2	14|8|2|1|1|2	28	4.67	6	1|0|0|2	0.78	1	0.78	1	0.78	-2.11	6.22	0.08
Telomere	O95352	ATG7	2|0|0|0|0|0	2	0.33	6	0|0|0|0	0.32	0.96	0.32	0.96	0.32	-1.37	3.33	0.44
Telomere	O95361	TRIM16	1|0|0|0|0|0	1	0.17	6	0|0|0|0	0	0	0	0	0	-1.37	1.67	0.55
Telomere	O95363	FARS2	0|1|1|1|0|0	3	0.5	6	1|0|0|0	0	0	0	0	0	-1.91	2	0.55
Telomere	O95365	ZBTB7A	1|1|0|0|1|1	4	0.67	6	0|0|0|0	0	0	0	0	0	-1.37	6.67	0.55
Telomere	O95372	LYPLA2	1|1|1|0|1|3	7	1.17	6	0|0|0|2	0.26	0.77	0.26	0.77	0.26	-2.91	2.33	0.51
Telomere	O95373	IPO7	7|8|3|1|1|4	24	4	6	1|0|0|4	0.77	0.9	0.77	0.9	0.77	-3.56	3.2	0.08
Telomere	O95376	ARIH2	1|1|1|0|0|1	4	0.67	6	1|0|0|1	0	0	0	0	0	-2.81	1.33	0.55
Telomere	O95382	MAP3K6	1|0|0|0|0|0	1	0.17	6	0|0|0|0	0	0	0	0	0	-1.37	1.67	0.55
Telomere	O95391	SLU7	1|3|0|0|0|0	4	0.67	6	0|0|0|0	0.33	0.99	0.33	0.99	0.33	-1.37	6.67	0.4
Telomere	O95394	PGM3	0|3|1|1|1|1	7	1.17	6	1|0|0|2	0.21	0.64	0.21	0.64	0.21	-3.71	1.56	0.52
Telomere	O95400	CD2BP2	3|4|0|1|0|0	8	1.33	6	0|0|0|0	0.66	1	0.66	1	0.66	-1.37	13.33	0.15
Telomere	O95425	SVIL	4|0|0|0|0|0	4	0.67	6	0|0|0|0	0.33	1	0.33	1	0.33	-1.37	6.67	0.37
Telomere	O95429	BAG4	1|2|0|0|0|0	3	0.5	6	0|0|0|0	0.32	0.96	0.32	0.96	0.32	-1.37	5	0.44
Telomere	O95433	AHSA1	10|4|2|2|1|2	21	3.5	6	1|0|0|4	0.54	0.96	0.54	0.96	0.54	-3.56	2.8	0.24
Telomere	O95453	PARN	7|4|0|0|0|1	12	2	6	0|0|0|3	0.57	0.94	0.57	0.94	0.57	-3.95	2.67	0.24
Telomere	O95456	PSMG1	2|2|0|0|0|0	4	0.67	6	0|0|0|0	0.64	0.96	0.64	0.96	0.64	-1.37	6.67	0.2
Telomere	O95470	SGPL1	2|0|0|0|0|1	3	0.5	6	0|0|0|0	0.32	0.96	0.32	0.96	0.32	-1.37	5	0.44
Telomere	O95478	NSA2	0|1|1|1|1|1	5	0.83	6	1|0|0|4	0	0	0	0	0	-5.18	0.67	0.55
Telomere	O95486	SEC24A	7|0|0|0|0|0	7	1.17	6	0|0|0|3	0.31	0.94	0.31	0.94	0.31	-3.95	1.56	0.49
Telomere	O95487	SEC24B	13|0|0|0|0|0	13	2.17	6	0|0|0|5	0.32	0.97	0.32	0.97	0.32	-4.94	1.73	0.44
Telomere	O95544	NADK	1|0|0|0|0|0	1	0.17	6	0|0|0|0	0	0	0	0	0	-1.37	1.67	0.55
Telomere	O95551	TDP2	1|0|0|0|0|0	1	0.17	6	0|0|0|0	0	0	0	0	0	-1.37	1.67	0.55
Telomere	O95571	ETHE1	1|3|1|2|1|1	9	1.5	6	2|0|0|0	0.45	0.77	0.45	0.77	0.45	-0.86	3	0.28
Telomere	O95573	ACSL3	7|2|1|2|0|0	12	2	6	1|0|0|5	0.31	0.8	0.31	0.8	0.31	-6.24	1.33	0.49
Telomere	O95602	POLR1A	11|1|0|0|0|0	12	2	6	0|0|0|0	0.33	1	0.33	1	0.33	-1.37	20	0.32
Telomere	O95613	PCNT	1|0|0|0|0|0	1	0.17	6	0|0|1|0	0	0	0	0	0	-1.91	0.67	0.55
Telomere	O95625	ZBTB11	2|0|0|0|0|0	2	0.33	6	0|0|0|0	0.32	0.96	0.32	0.96	0.32	-1.37	3.33	0.44
Telomere	O95628	CNOT4	1|0|0|0|0|0	1	0.17	6	0|0|0|0	0	0	0	0	0	-1.37	1.67	0.55
Telomere	O95630	STAMBP	4|4|0|0|0|0	8	1.33	6	0|0|0|1	0.66	0.99	0.66	0.99	0.66	-1.91	5.33	0.17
Telomere	O95639	CPSF4	1|2|0|0|0|0	3	0.5	6	0|0|0|0	0.32	0.96	0.32	0.96	0.32	-1.37	5	0.44
Telomere	O95671	ASMTL	4|1|0|0|0|0	5	0.83	6	0|0|0|2	0.29	0.88	0.29	0.88	0.29	-2.91	1.67	0.5
Telomere	O95684	CEP43	3|0|0|0|0|0	3	0.5	6	0|0|0|0	0.33	0.99	0.33	0.99	0.33	-1.37	5	0.4
Telomere	O95696	BRD1	0|1|0|1|0|0	2	0.33	6	0|0|0|1	0	0	0	0	0	-1.91	1.33	0.55
Telomere	O95714	HERC2	9|0|0|0|0|0	9	1.5	6	0|0|0|7	0.28	0.85	0.28	0.85	0.28	-7.19	0.86	0.5
Telomere	O95747	OXSR1	5|1|0|1|1|0	8	1.33	6	1|1|0|1	0.32	0.95	0.32	0.95	0.32	-3.71	1.78	0.48
Telomere	O95757	HSPA4L	3|2|0|0|1|1	7	1.17	6	0|0|0|0	0.65	0.99	0.65	0.99	0.65	-1.37	11.67	0.18
Telomere	O95758	PTBP3	1|0|0|0|0|0	1	0.17	6	0|0|0|0	0	0	0	0	0	-1.37	1.67	0.55
Telomere	O95759	TBC1D8	1|0|0|0|0|0	1	0.17	6	0|0|0|0	0	0	0	0	0	-1.37	1.67	0.55
Telomere	O95777	LSM8	0|2|1|0|0|0	3	0.5	6	0|0|0|0	0.32	0.96	0.32	0.96	0.32	-1.37	5	0.44
Telomere	O95782	AP2A1	33|1|2|2|2|3	43	7.17	6	2|0|0|16	0.32	0.96	0.32	0.96	0.32	-15.51	1.59	0.44
Telomere	O95785	WIZ	2|2|0|0|0|0	4	0.67	6	0|0|0|0	0.64	0.96	0.64	0.96	0.64	-1.37	6.67	0.2
Telomere	O95786	DDX58	1|0|0|0|0|0	1	0.17	6	0|0|0|0	0	0	0	0	0	-1.37	1.67	0.55
Telomere	O95793	STAU1	8|1|2|0|0|5	16	2.67	6	0|0|0|3	0.75	0.96	0.75	0.96	0.75	-3.95	3.56	0.09
Telomere	O95801	TTC4	0|0|0|0|0|2	2	0.33	6	0|0|0|0	0.32	0.96	0.32	0.96	0.32	-1.37	3.33	0.44
Telomere	O95816	BAG2	3|2|1|1|1|2	10	1.67	6	1|0|0|1	0.63	0.81	0.63	0.81	0.63	-1.2	3.33	0.21
Telomere	O95817	BAG3	3|1|2|1|1|1	9	1.5	6	1|0|0|1	0.45	0.81	0.45	0.81	0.45	-1.2	3	0.28
Telomere	O95819	MAP4K4	8|0|0|1|0|0	9	1.5	6	1|0|0|1	0.33	1	0.33	1	0.33	-2.81	3	0.35
Telomere	O95831	AIFM1	3|0|1|1|0|4	9	1.5	6	0|0|0|0	0.66	1	0.66	1	0.66	-1.37	15	0.15
Telomere	O95834	EML2	1|3|1|0|1|1	7	1.17	6	1|0|0|2	0.21	0.64	0.21	0.64	0.21	-3.71	1.56	0.52
Telomere	O95861	BPNT1	4|3|0|1|0|0	8	1.33	6	0|0|0|2	0.55	0.88	0.55	0.88	0.55	-2.91	2.67	0.24
Telomere	O95905	ECD	3|0|0|0|0|0	3	0.5	6	0|0|0|0	0.33	0.99	0.33	0.99	0.33	-1.37	5	0.4
Telomere	O95983	MBD3	0|2|0|0|0|1	3	0.5	6	0|0|0|1	0.26	0.79	0.26	0.79	0.26	-1.91	2	0.5
Telomere	O95999	BCL10	2|0|0|0|0|0	2	0.33	6	0|0|0|0	0.32	0.96	0.32	0.96	0.32	-1.37	3.33	0.44
Telomere	O96000	NDUFB10	0|1|1|0|1|0	3	0.5	6	0|0|0|0	0	0	0	0	0	-1.37	5	0.55
Telomere	O96005	CLPTM1	4|0|0|0|0|0	4	0.67	6	0|0|0|0	0.33	1	0.33	1	0.33	-1.37	6.67	0.37
Telomere	O96008	TOMM40	6|0|0|1|1|1	9	1.5	6	0|0|0|0	0.33	1	0.33	1	0.33	-1.37	15	0.34
Telomere	O96013	PAK4	2|0|0|0|0|0	2	0.33	6	0|0|0|0	0.32	0.96	0.32	0.96	0.32	-1.37	3.33	0.44
Telomere	O96019	ACTL6A	4|2|2|2|1|2	13	2.17	6	0|0|0|2	0.68	0.88	0.68	0.88	0.68	-0.86	4.33	0.12
Telomere	O96028	NSD2	3|0|0|0|0|0	3	0.5	6	0|0|0|0	0.33	0.99	0.33	0.99	0.33	-1.37	5	0.4
Telomere	P00338	LDHA	14|8|7|6|6|13	54	9	6	7|3|1|12	0.02	0.05	0.02	0.05	0.02	-11.87	1.57	0.54
Telomere	P00367	GLUD1	6|7|7|11|6|10	47	7.83	6	10|0|1|2	0.4	0.62	0.4	0.62	0.4	-3.23	2.41	0.29
Telomere	P00374	DHFR	2|1|0|0|0|0	3	0.5	6	0|0|0|0	0.32	0.96	0.32	0.96	0.32	-1.37	5	0.44
Telomere	P00387	CYB5R3	3|2|0|1|2|3	11	1.83	6	0|0|0|2	0.7	0.77	0.7	0.77	0.7	-2.91	3.67	0.11
Telomere	P00390	GSR	3|4|1|1|2|3	14	2.33	6	3|0|0|3	0.22	0.36	0.22	0.36	0.22	-4.66	1.56	0.52
Telomere	P00395	MT-CO1	0|0|0|0|0|1	1	0.17	6	0|0|0|0	0	0	0	0	0	-1.37	1.67	0.55
Telomere	P00403	MT-CO2	0|3|2|3|3|4	15	2.5	6	3|1|0|2	0.21	0.37	0.21	0.37	0.21	-6.64	1.67	0.52
Telomere	P00441	SOD1	0|2|0|1|0|1	4	0.67	6	0|0|0|1	0.26	0.79	0.26	0.79	0.26	-1.91	2.67	0.5
Telomere	P00491	PNP	0|1|0|0|0|1	2	0.33	6	2|0|0|1	0	0	0	0	0	-3.71	0.44	0.55
Telomere	P00492	HPRT1	1|2|1|0|0|0	4	0.67	6	0|0|0|1	0.26	0.79	0.26	0.79	0.26	-1.91	2.67	0.5
Telomere	P00505	GOT2	0|10|7|7|4|13	41	6.83	6	7|2|2|1	0.57	0.92	0.57	0.92	0.57	-12.57	2.28	0.24
Telomere	P00519	ABL1	0|1|0|0|0|0	1	0.17	6	0|0|0|1	0	0	0	0	0	-1.91	0.67	0.55
Telomere	P00533	EGFR	5|1|1|2|2|2	13	2.17	6	1|0|0|1	0.68	0.99	0.68	0.99	0.68	-1.2	4.33	0.11
Telomere	P00558	PGK1	14|30|14|13|15|26	112	18.67	6	11|4|1|23	0.06	0.15	0.06	0.15	0.06	-15.63	1.91	0.54
Telomere	P00568	AK1	1|2|0|0|0|0	3	0.5	6	0|0|0|2	0.19	0.57	0.19	0.57	0.19	-2.91	1	0.52
Telomere	P00918	CA2	0|3|0|0|0|0	3	0.5	6	0|0|0|0	0.33	0.99	0.33	0.99	0.33	-1.37	5	0.4
Telomere	P01040	CSTA	0|1|1|1|0|0	3	0.5	6	1|1|0|0	0	0	0	0	0	-2.81	1	0.55
Telomere	P01106	MYC	0|1|0|0|0|0	1	0.17	6	0|0|0|0	0	0	0	0	0	-1.37	1.67	0.55
Telomere	P01111	NRAS	0|0|0|0|0|1	1	0.17	6	0|0|0|0	0	0	0	0	0	-1.37	1.67	0.55
Telomere	P01130	LDLR	1|0|0|0|0|0	1	0.17	6	0|0|0|0	0	0	0	0	0	-1.37	1.67	0.55
Telomere	P01889	HLA-B	3|1|1|1|1|1	8	1.33	6	0|0|0|0	0.33	0.99	0.33	0.99	0.33	1.14	13.33	0.4
Telomere	P02533	KRT14	8|18|14|13|6|8	67	11.17	6	21|16|14|0	0	0	0	0	0	-38.16	0.88	0.55
Telomere	P02538	KRT6A	5|9|8|8|0|4	34	5.67	6	10|10|8|0	0	0	0	0	0	-30.02	0.81	0.55
Telomere	P02545	LMNA	18|29|20|21|9|30	127	21.17	6	25|1|1|21	0	0	0	0	0	-29.2	1.76	0.55
Telomere	P02768	ALB	0|4|2|3|1|1	11	1.83	6	4|7|2|0	0	0	0	0	0	-13.66	0.56	0.55
Telomere	P02786	TFRC	6|7|3|3|2|12	33	5.5	6	2|0|0|11	0.29	0.72	0.29	0.72	0.29	-8.63	1.69	0.5
Telomere	P02794	FTH1	0|1|0|0|0|0	1	0.17	6	0|0|0|0	0	0	0	0	0	-1.37	1.67	0.55
Telomere	P03891	MT-ND2	0|0|0|0|1|1	2	0.33	6	0|0|0|0	0	0	0	0	0	-1.37	3.33	0.55
Telomere	P03905	MT-ND4	0|0|0|2|0|0	2	0.33	6	1|0|0|0	0.26	0.79	0.26	0.79	0.26	-1.91	1.33	0.5
Telomere	P03915	MT-ND5	0|0|1|1|0|1	3	0.5	6	2|0|0|0	0	0	0	0	0	-2.91	1	0.55
Telomere	P04040	CAT	3|0|0|1|0|2	6	1	6	0|0|1|2	0.32	0.64	0.32	0.64	0.32	-3.71	1.33	0.44
Telomere	P04049	RAF1	0|0|0|0|1|0	1	0.17	6	0|0|0|0	0	0	0	0	0	-1.37	1.67	0.55
Telomere	P04075	ALDOA	14|24|11|12|10|19	90	15	6	8|1|1|13	0.48	0.88	0.48	0.88	0.48	-6.61	2.61	0.27
Telomere	P04080	CSTB	0|0|0|1|0|0	1	0.17	6	0|0|0|0	0	0	0	0	0	-1.37	1.67	0.55
Telomere	P04083	ANXA1	13|21|11|8|17|26	96	16	6	11|3|5|25	0	0	0	0	0	-27.36	1.45	0.55
Telomere	P04179	SOD2	0|1|0|0|1|0	2	0.33	6	1|0|0|0	0	0	0	0	0	-1.91	1.33	0.55
Telomere	P04181	OAT	10|5|10|9|11|17	62	10.33	6	8|2|1|7	0.34	0.88	0.34	0.88	0.34	-9.11	2.3	0.31
Telomere	P04183	TK1	4|1|1|0|0|3	9	1.5	6	0|0|0|4	0.41	0.69	0.41	0.69	0.41	-3.82	1.5	0.29
Telomere	P04259	KRT6B	2|2|1|1|0|1	7	1.17	6	2|3|0|0	0.07	0.1	0.07	0.1	0.07	-5.38	0.93	0.54
Telomere	P04264	KRT1	34|62|55|50|31|36	268	44.67	6	87|57|39|12	0	0	0	0	0	-129.69	0.92	0.55
Telomere	P04350	TUBB4A	3|1|1|1|0|1	7	1.17	6	0|0|0|1	0.32	0.95	0.32	0.95	0.32	-1.91	4.67	0.48
Telomere	P04406	GAPDH	33|32|11|15|12|20	123	20.5	6	11|7|5|22	0.04	0.08	0.04	0.08	0.04	-23.92	1.82	0.54
Telomere	P04424	ASL	1|1|0|0|0|0	2	0.33	6	0|0|0|1	0	0	0	0	0	-1.91	1.33	0.55
Telomere	P04439	HLA-A	2|0|1|1|0|1	5	0.83	6	0|0|0|0	0.32	0.96	0.32	0.96	0.32	-1.37	8.33	0.44
Telomere	P04632	CAPNS1	6|1|1|1|3|3	15	2.5	6	1|0|0|3	0.6	0.88	0.6	0.88	0.6	-2.76	2.5	0.22
Telomere	P04792	HSPB1	8|7|9|9|8|11	52	8.67	6	7|1|3|6	0.1	0.22	0.1	0.22	0.1	-5.76	2.04	0.53
Telomere	P04818	TYMS	4|2|0|1|0|0	7	1.17	6	0|0|0|0	0.65	1	0.65	1	0.65	-1.37	11.67	0.17
Telomere	P04843	RPN1	10|9|6|10|4|7	46	7.67	6	5|0|0|8	0.42	0.48	0.42	0.48	0.42	-5.85	2.36	0.29
Telomere	P04844	RPN2	4|4|1|1|1|5	16	2.67	6	1|0|0|3	0.71	0.79	0.71	0.79	0.71	-2.76	2.67	0.1
Telomere	P04899	GNAI2	6|2|3|0|2|3	16	2.67	6	1|0|0|2	0.75	0.99	0.75	0.99	0.75	-3.71	3.56	0.09
Telomere	P04908	H2AC4	0|0|1|1|2|2	6	1	6	0|0|0|0	0.64	0.96	0.64	0.96	0.64	-1.37	10	0.2
Telomere	P04920	SLC4A2	1|0|0|0|0|0	1	0.17	6	0|0|0|0	0	0	0	0	0	-1.37	1.67	0.55
Telomere	P05023	ATP1A1	16|15|6|5|4|12	58	9.67	6	2|0|0|14	0.66	0.8	0.66	0.8	0.66	-8.11	2.42	0.17
Telomere	P05026	ATP1B1	0|1|0|0|0|0	1	0.17	6	0|0|0|1	0	0	0	0	0	-1.91	0.67	0.55
Telomere	P05067	APP	2|0|0|0|0|0	2	0.33	6	0|0|0|0	0.32	0.96	0.32	0.96	0.32	-1.37	3.33	0.44
Telomere	P05091	ALDH2	0|5|5|3|4|4	21	3.5	6	5|0|0|1	0.53	0.59	0.53	0.59	0.53	-6.24	2.33	0.25
Telomere	P05114	HMGN1	0|0|0|0|0|1	1	0.17	6	0|0|0|0	0	0	0	0	0	-1.37	1.67	0.55
Telomere	P05141	SLC25A5	6|7|10|10|4|7	44	7.33	6	9|0|0|5	0.25	0.35	0.25	0.35	0.25	-6.67	2.1	0.52
Telomere	P05161	ISG15	2|0|0|1|0|0	3	0.5	6	0|0|0|0	0.32	0.96	0.32	0.96	0.32	-1.37	5	0.44
Telomere	P05165	PCCA	13|73|78|83|93|49	389	64.83	6	102|44|34|24	0	0	0	0	0	-179.15	1.27	0.55
Telomere	P05166	PCCB	4|27|23|30|27|20	131	21.83	6	28|19|13|11	0	0	0	0	0	-64.01	1.23	0.55
Telomere	P05198	EIF2S1	8|4|1|1|2|2	18	3	6	3|0|0|7	0.2	0.55	0.2	0.55	0.2	-7.99	1.2	0.52
Telomere	P05204	HMGN2	0|0|0|0|0|1	1	0.17	6	0|0|0|0	0	0	0	0	0	-1.37	1.67	0.55
Telomere	P05386	RPLP1	1|1|0|0|1|4	7	1.17	6	0|0|0|2	0.29	0.88	0.29	0.88	0.29	-2.91	2.33	0.5
Telomere	P05387	RPLP2	1|4|2|1|1|6	15	2.5	6	1|0|1|0	0.82	1	0.82	1	0.82	-1.2	5	0.06
Telomere	P05388	RPLP0	6|4|7|7|6|10	40	6.67	6	3|2|2|11	0.02	0.04	0.02	0.04	0.02	-10.45	1.48	0.54
Telomere	P05423	POLR3D	0|2|0|0|0|0	2	0.33	6	0|0|0|0	0.32	0.96	0.32	0.96	0.32	-1.37	3.33	0.44
Telomere	P05455	SSB	7|6|1|1|3|7	25	4.17	6	0|0|0|2	0.98	0.99	0.98	0.99	0.98	-0.86	8.33	0.01
Telomere	P05556	ITGB1	1|6|5|2|1|8	23	3.83	6	0|0|0|2	0.97	0.99	0.97	0.99	0.97	-0.86	7.67	0.01
Telomere	P05783	KRT18	10|22|14|10|10|30	96	16	6	18|6|7|15	0	0.01	0	0.01	0	-26.56	1.39	0.54
Telomere	P05787	KRT8	17|43|30|26|28|61	205	34.17	6	45|14|9|38	0	0	0	0	0	-70.19	1.29	0.55
Telomere	P06396	GSN	5|4|0|1|0|3	13	2.17	6	1|0|0|2	0.82	0.96	0.82	0.96	0.82	-3.71	2.89	0.06
Telomere	P06400	RB1	3|5|0|0|0|0	8	1.33	6	0|0|0|1	0.65	1	0.65	1	0.65	-1.91	5.33	0.19
Telomere	P06454	PTMA	0|0|0|0|0|2	2	0.33	6	0|0|0|0	0.32	0.96	0.32	0.96	0.32	-1.37	3.33	0.44
Telomere	P06493	CDK1	4|8|6|8|3|4	33	5.5	6	4|0|0|5	0.56	0.67	0.56	0.67	0.56	-4	2.44	0.24
Telomere	P06576	ATP5F1B	3|17|13|17|9|17	76	12.67	6	14|2|5|4	0.12	0.12	0.12	0.12	0.12	-18.63	2.03	0.53
Telomere	P06702	S100A9	0|1|0|0|0|0	1	0.17	6	3|1|2|0	0	0	0	0	0	-6.64	0.11	0.55
Telomere	P06703	S100A6	0|1|1|1|0|3	6	1	6	0|0|0|1	0.32	0.95	0.32	0.95	0.32	-1.91	4	0.48
Telomere	P06730	EIF4E	1|0|0|1|0|1	3	0.5	6	0|0|0|0	0	0	0	0	0	-1.37	5	0.55
Telomere	P06733	ENO1	38|36|19|21|18|36	168	28	6	16|4|7|41	0	0	0	0	0	-33.42	1.65	0.55
Telomere	P06737	PYGL	20|11|8|7|3|5	54	9	6	7|0|0|13	0.28	0.81	0.28	0.81	0.28	-13.46	1.8	0.5
Telomere	P06744	GPI	12|12|1|3|2|2	32	5.33	6	3|1|1|6	0.63	0.94	0.63	0.94	0.63	-9.33	1.94	0.21
Telomere	P06748	NPM1	10|12|9|7|7|20	65	10.83	6	7|1|2|16	0.1	0.31	0.1	0.31	0.1	-12.77	1.67	0.53
Telomere	P06753	TPM3	5|8|3|6|3|11	36	6	6	5|1|1|3	0.62	0.97	0.62	0.97	0.62	-5.29	2.4	0.21
Telomere	P06756	ITGAV	1|0|0|0|0|0	1	0.17	6	0|0|0|0	0	0	0	0	0	-1.37	1.67	0.55
Telomere	P06899	H2BC11	0|2|2|2|2|2	10	1.67	6	1|1|0|1	0.33	0.33	0.33	0.33	0.33	-3.71	2.22	0.35
Telomere	P07099	EPHX1	1|0|0|0|0|0	1	0.17	6	0|0|0|0	0	0	0	0	0	-1.37	1.67	0.55
Telomere	P07195	LDHB	8|9|8|8|2|11	46	7.67	6	4|2|1|9	0.12	0.27	0.12	0.27	0.12	-11.9	1.92	0.53
Telomere	P07203	GPX1	0|1|0|0|1|0	2	0.33	6	0|0|0|1	0	0	0	0	0	-1.91	1.33	0.55
Telomere	P07205	PGK2	0|0|1|0|0|0	1	0.17	6	0|0|0|0	0	0	0	0	0	-1.37	1.67	0.55
Telomere	P07237	P4HB	14|13|4|5|5|19	60	10	6	5|0|0|6	0.93	0.98	0.93	0.98	0.93	-4.26	3.64	0.02
Telomere	P07305	H1-0	0|3|3|1|2|4	13	2.17	6	0|0|0|1	0.96	0.99	0.96	0.99	0.96	-1.91	8.67	0.01
Telomere	P07311	ACYP1	0|1|0|0|0|0	1	0.17	6	0|0|0|0	0	0	0	0	0	-1.37	1.67	0.55
Telomere	P07355	ANXA2	33|30|17|23|16|29	148	24.67	6	19|9|10|36	0	0	0	0	0	-42.08	1.33	0.55
Telomere	P07384	CAPN1	16|9|5|5|5|5	45	7.5	6	4|0|0|9	0.41	0.89	0.41	0.89	0.41	-4.44	2.31	0.29
Telomere	P07437	TUBB	48|31|27|29|32|53	220	36.67	6	18|8|8|43	0	0	0	0	0	-29.39	1.9	0.55
Telomere	P07477	PRSS1	0|1|2|2|1|1	7	1.17	6	1|1|1|0	0.22	0.33	0.22	0.33	0.22	-3.71	1.56	0.52
Telomere	P07737	PFN1	9|13|12|9|10|12	65	10.83	6	8|4|3|11	0	0	0	0	0	-10.64	1.67	0.55
Telomere	P07741	APRT	1|2|0|0|0|1	4	0.67	6	0|0|0|3	0.15	0.44	0.15	0.44	0.15	-3.95	0.89	0.53
Telomere	P07814	EPRS1	36|3|3|7|3|7	59	9.83	6	3|0|0|26	0.31	0.92	0.31	0.92	0.31	-21.84	1.36	0.49
Telomere	P07900	HSP90AA1	56|21|17|18|18|40	170	28.33	6	13|5|3|25	0.48	0.98	0.48	0.98	0.48	-16.55	2.46	0.27
Telomere	P07910	HNRNPC	8|20|8|10|9|24	79	13.17	6	10|2|2|9	0.57	0.95	0.57	0.95	0.57	-9.22	2.29	0.24
Telomere	P07942	LAMB1	1|0|0|0|0|0	1	0.17	6	0|0|0|0	0	0	0	0	0	-1.37	1.67	0.55
Telomere	P07947	YES1	6|1|0|0|0|0	7	1.17	6	0|0|0|1	0.33	1	0.33	1	0.33	-1.91	4.67	0.36
Telomere	P07948	LYN	2|0|0|0|0|0	2	0.33	6	0|0|0|0	0.32	0.96	0.32	0.96	0.32	-1.37	3.33	0.44
Telomere	P07951	TPM2	0|1|0|0|0|0	1	0.17	6	0|0|0|0	0	0	0	0	0	-1.37	1.67	0.55
Telomere	P07954	FH	6|4|3|2|2|4	21	3.5	6	3|0|0|1	0.74	0.88	0.74	0.88	0.74	-1.28	3.5	0.09
Telomere	P08047	SP1	2|1|0|0|0|0	3	0.5	6	0|0|0|0	0.32	0.96	0.32	0.96	0.32	-1.37	5	0.44
Telomere	P08048	ZFY	0|1|0|0|0|0	1	0.17	6	0|0|0|0	0	0	0	0	0	-1.37	1.67	0.55
Telomere	P08133	ANXA6	10|6|4|4|4|7	35	5.83	6	3|0|0|8	0.36	0.7	0.36	0.7	0.36	-4.08	2.12	0.3
Telomere	P08134	RHOC	1|0|0|1|1|3	6	1	6	1|0|0|0	0.32	0.95	0.32	0.95	0.32	-1.91	4	0.48
Telomere	P08195	SLC3A2	2|8|2|4|0|7	23	3.83	6	0|0|1|2	0.95	1	0.95	1	0.95	-3.71	5.11	0.02
Telomere	P08237	PFKM	7|0|1|1|0|1	10	1.67	6	1|0|0|3	0.31	0.94	0.31	0.94	0.31	-4.16	1.67	0.49
Telomere	P08238	HSP90AB1	91|52|38|37|33|69	320	53.33	6	36|10|8|80	0	0	0	0	0	-69.49	1.59	0.55
Telomere	P08240	SRPRA	7|0|1|2|0|1	11	1.83	6	0|0|0|2	0.52	0.99	0.52	0.99	0.52	-2.91	3.67	0.26
Telomere	P08243	ASNS	10|13|2|2|4|6	37	6.17	6	4|0|0|6	0.64	0.91	0.64	0.91	0.64	-6.43	2.47	0.21
Telomere	P08397	HMBS	1|4|0|0|0|0	5	0.83	6	0|0|0|1	0.33	0.99	0.33	0.99	0.33	-1.91	3.33	0.43
Telomere	P08559	PDHA1	4|3|5|4|3|4	23	3.83	6	2|1|0|0	0.89	0.96	0.89	0.96	0.89	0.56	5.11	0.04
Telomere	P08574	CYC1	3|2|0|0|2|3	10	1.67	6	0|0|0|1	0.9	0.95	0.9	0.95	0.9	-1.91	6.67	0.03
Telomere	P08579	SNRPB2	0|4|1|0|1|1	7	1.17	6	0|0|0|0	0.33	1	0.33	1	0.33	-1.37	11.67	0.37
Telomere	P08581	MET	4|0|0|0|1|1	6	1	6	0|0|0|0	0.33	1	0.33	1	0.33	-1.37	10	0.37
Telomere	P08621	SNRNP70	4|16|6|6|1|2	35	5.83	6	3|5|3|1	0.37	1	0.37	1	0.37	-10.41	1.94	0.3
Telomere	P08651	NFIC	3|3|0|1|1|1	9	1.5	6	0|0|0|0	0.66	0.99	0.66	0.99	0.66	-1.37	15	0.16
Telomere	P08708	RPS17	4|2|3|1|5|10	25	4.17	6	2|0|0|2	0.86	1	0.86	1	0.86	-2.96	4.17	0.05
Telomere	P08727	KRT19	9|23|17|21|9|19	98	16.33	6	21|10|10|15	0	0	0	0	0	-37.73	1.17	0.55
Telomere	P08754	GNAI3	2|1|0|1|1|0	5	0.83	6	0|0|0|0	0.32	0.96	0.32	0.96	0.32	-1.37	8.33	0.44
Telomere	P08758	ANXA5	7|9|5|6|3|6	36	6	6	5|0|1|4	0.44	0.74	0.44	0.74	0.44	-5.05	2.4	0.28
Telomere	P08779	KRT16	4|9|3|4|0|2	22	3.67	6	8|10|8|0	0	0	0	0	0	-27.9	0.56	0.55
Telomere	P08865	RPSA	5|10|11|11|13|12	62	10.33	6	4|1|1|7	0.79	0.88	0.79	0.88	0.79	-4.84	3.18	0.07
Telomere	P08962	CD63	0|0|0|0|0|1	1	0.17	6	0|0|0|0	0	0	0	0	0	-1.37	1.67	0.55
Telomere	P09001	MRPL3	0|2|0|1|0|0	3	0.5	6	1|0|0|1	0.18	0.53	0.18	0.53	0.18	-2.81	1	0.52
Telomere	P09012	SNRPA	0|9|3|4|2|6	24	4	6	1|1|0|0	0.98	1	0.98	1	0.98	-2.81	8	0.01
Telomere	P09104	ENO2	1|2|0|0|0|0	3	0.5	6	0|0|0|0	0.32	0.96	0.32	0.96	0.32	-1.37	5	0.44
Telomere	P09110	ACAA1	3|0|0|0|0|0	3	0.5	6	0|0|0|6	0.08	0.25	0.08	0.25	0.08	-6.07	0.33	0.53
Telomere	P09211	GSTP1	11|8|7|7|5|8	46	7.67	6	7|2|1|12	0	0.01	0	0.01	0	-12.46	1.39	0.55
Telomere	P09234	SNRPC	0|2|0|2|0|1	5	0.83	6	0|0|0|0	0.64	0.96	0.64	0.96	0.64	-1.37	8.33	0.2
Telomere	P09382	LGALS1	2|4|2|1|1|3	13	2.17	6	1|0|1|3	0.3	0.55	0.3	0.55	0.3	-3.89	1.73	0.5
Telomere	P09429	HMGB1	4|14|8|5|3|5	39	6.5	6	3|0|0|7	0.52	0.92	0.52	0.92	0.52	-4.69	2.6	0.25
Telomere	P09455	RBP1	3|4|2|1|2|1	13	2.17	6	2|0|0|3	0.3	0.52	0.3	0.52	0.3	-3.75	1.73	0.49
Telomere	P09496	CLTA	0|1|0|1|1|3	6	1	6	0|0|0|2	0.26	0.77	0.26	0.77	0.26	-2.91	2	0.51
Telomere	P09497	CLTB	1|0|0|0|0|0	1	0.17	6	0|0|0|0	0	0	0	0	0	-1.37	1.67	0.55
Telomere	P09525	ANXA4	6|3|1|0|0|0	10	1.67	6	0|0|0|1	0.65	1	0.65	1	0.65	-1.91	6.67	0.19
Telomere	P09543	CNP	2|1|0|0|1|1	5	0.83	6	0|0|0|0	0.32	0.96	0.32	0.96	0.32	-1.37	8.33	0.44
Telomere	P09622	DLD	2|5|1|4|4|3	19	3.17	6	4|0|1|2	0.28	0.43	0.28	0.43	0.28	-5.64	1.81	0.5
Telomere	P09651	HNRNPA1	14|11|8|7|7|15	62	10.33	6	2|1|0|2	1	1	1	1	1	3.68	8.27	0
Telomere	P09661	SNRPA1	2|7|3|1|3|5	21	3.5	6	0|0|0|1	0.98	1	0.98	1	0.98	-0.3	14	0.01
Telomere	P09669	COX6C	0|0|0|0|0|1	1	0.17	6	0|0|0|0	0	0	0	0	0	-1.37	1.67	0.55
Telomere	P09874	PARP1	27|27|17|14|10|17	112	18.67	6	11|0|0|18	0.48	0.71	0.48	0.71	0.48	-11.08	2.57	0.27
Telomere	P09884	POLA1	12|4|0|1|1|1	19	3.17	6	0|0|0|1	0.66	1	0.66	1	0.66	-1.91	12.67	0.16
Telomere	P09960	LTA4H	12|17|4|4|3|3	43	7.17	6	6|0|0|7	0.55	0.93	0.55	0.93	0.55	-7.44	2.21	0.24
Telomere	P09972	ALDOC	3|8|2|3|2|3	21	3.5	6	1|0|0|3	0.63	0.97	0.63	0.97	0.63	-1.28	3.5	0.21
Telomere	P0C0S5	H2AZ1	0|2|1|1|2|3	9	1.5	6	1|1|0|2	0.26	0.44	0.26	0.44	0.26	-4.4	1.5	0.51
Telomere	P0C7P4	UQCRFS1P1	0|2|1|1|0|1	5	0.83	6	1|0|0|0	0.26	0.79	0.26	0.79	0.26	-1.91	3.33	0.5
Telomere	P0CB33	ZNF735	1|1|0|0|0|0	2	0.33	6	0|0|0|0	0	0	0	0	0	-1.37	3.33	0.55
Telomere	P0CG13	CHTF8	0|1|0|1|0|0	2	0.33	6	0|0|0|0	0	0	0	0	0	-1.37	3.33	0.55
Telomere	P0DJD0	RGPD1	3|0|0|0|0|0	3	0.5	6	0|0|0|0	0.33	0.99	0.33	0.99	0.33	-1.37	5	0.4
Telomere	P0DMV8	HSPA1A	29|18|9|15|21|34	126	21	6	14|3|5|24	0.02	0.06	0.02	0.06	0.02	-27.67	1.83	0.54
Telomere	P0DP23	CALM1	0|6|1|1|2|4	14	2.33	6	1|1|0|0	0.82	1	0.82	1	0.82	-2.81	4.67	0.06
Telomere	P0DPB6	POLR1D	1|0|0|0|0|0	1	0.17	6	0|0|0|0	0	0	0	0	0	-1.37	1.67	0.55
Telomere	P10155	RO60	3|2|0|1|0|2	8	1.33	6	0|0|0|4	0.37	0.53	0.37	0.53	0.37	-3.82	1.33	0.3
Telomere	P10244	MYBL2	2|0|0|0|0|0	2	0.33	6	0|0|0|0	0.32	0.96	0.32	0.96	0.32	-1.37	3.33	0.44
Telomere	P10301	RRAS	0|2|1|1|0|2	6	1	6	0|0|0|0	0.64	0.96	0.64	0.96	0.64	-1.37	10	0.2
Telomere	P10321	HLA-C	0|0|0|0|0|1	1	0.17	6	0|0|0|1	0	0	0	0	0	-1.91	0.67	0.55
Telomere	P10398	ARAF	4|0|0|0|0|0	4	0.67	6	0|0|0|0	0.33	1	0.33	1	0.33	-1.37	6.67	0.37
Telomere	P10515	DLAT	10|5|6|7|5|7	40	6.67	6	6|0|0|6	0.3	0.6	0.3	0.6	0.3	-3.8	2.22	0.5
Telomere	P10599	TXN	0|6|2|3|4|4	19	3.17	6	5|2|1|4	0.02	0.05	0.02	0.05	0.02	-12.96	1.06	0.54
Telomere	P10606	COX5B	0|2|0|0|0|0	2	0.33	6	0|0|0|0	0.32	0.96	0.32	0.96	0.32	-1.37	3.33	0.44
Telomere	P10644	PRKAR1A	6|2|1|2|1|1	13	2.17	6	2|0|0|3	0.35	0.84	0.35	0.84	0.35	-3.75	1.73	0.31
Telomere	P10768	ESD	6|6|0|1|1|5	19	3.17	6	1|0|0|3	0.85	0.88	0.85	0.88	0.85	-4.16	3.17	0.05
Telomere	P10809	HSPD1	30|37|39|42|49|60	257	42.83	6	35|13|14|28	0	0	0	0	0	-36.73	1.9	0.55
Telomere	P11021	HSPA5	12|16|14|13|13|22	90	15	6	7|1|3|8	0.74	0.99	0.74	0.99	0.74	-1.9	3.16	0.09
Telomere	P11142	HSPA8	57|42|35|30|21|65	250	41.67	6	28|7|8|65	0	0	0	0	0	-64.63	1.54	0.55
Telomere	P11166	SLC2A1	2|6|3|3|4|3	21	3.5	6	2|1|1|2	0.45	0.86	0.45	0.86	0.45	-3.3	2.33	0.27
Telomere	P11171	EPB41	1|1|0|0|0|0	2	0.33	6	0|0|0|1	0	0	0	0	0	-1.91	1.33	0.55
Telomere	P11172	UMPS	4|1|0|0|0|0	5	0.83	6	1|0|0|1	0.32	0.95	0.32	0.95	0.32	-2.81	1.67	0.49
Telomere	P11177	PDHB	2|4|4|4|2|5	21	3.5	6	3|0|0|5	0.18	0.28	0.18	0.28	0.18	-4.63	1.75	0.52
Telomere	P11182	DBT	0|2|1|0|0|0	3	0.5	6	1|0|0|0	0.26	0.79	0.26	0.79	0.26	-1.91	2	0.5
Telomere	P11216	PYGB	10|4|5|7|1|4	31	5.17	6	3|0|0|9	0.26	0.6	0.26	0.6	0.26	-9.62	1.72	0.5
Telomere	P11233	RALA	0|1|0|0|0|0	1	0.17	6	0|0|0|0	0	0	0	0	0	-1.37	1.67	0.55
Telomere	P11274	BCR	2|0|0|0|0|0	2	0.33	6	0|0|0|0	0.32	0.96	0.32	0.96	0.32	-1.37	3.33	0.44
Telomere	P11310	ACADM	2|4|5|3|2|3	19	3.17	6	2|0|0|0	0.87	0.94	0.87	0.94	0.87	0.29	6.33	0.05
Telomere	P11387	TOP1	15|16|10|9|7|11	68	11.33	6	7|0|0|19	0.02	0.04	0.02	0.04	0.02	-12.5	1.74	0.54
Telomere	P11388	TOP2A	18|7|6|2|5|7	45	7.5	6	4|0|0|8	0.42	0.94	0.42	0.94	0.42	-7.89	2.5	0.29
Telomere	P11413	G6PD	8|4|1|3|0|2	18	3	6	2|0|0|5	0.38	0.82	0.38	0.82	0.38	-7.44	1.71	0.3
Telomere	P11474	ESRRA	1|0|0|0|0|0	1	0.17	6	0|0|0|0	0	0	0	0	0	-1.37	1.67	0.55
Telomere	P11498	PC	26|56|75|87|103|83	430	71.67	6	93|47|30|14	0	0	0	0	0	-128.46	1.56	0.55
Telomere	P11586	MTHFD1	27|16|10|13|8|14	88	14.67	6	11|0|1|19	0.18	0.55	0.18	0.55	0.18	-15.55	1.89	0.52
Telomere	P11717	IGF2R	5|3|1|1|0|0	10	1.67	6	0|0|0|2	0.57	0.94	0.57	0.94	0.57	-2.91	3.33	0.24
Telomere	P11766	ADH5	2|6|3|2|0|2	15	2.5	6	1|0|0|2	0.65	0.99	0.65	0.99	0.65	-3.71	3.33	0.18
Telomere	P11908	PRPS2	3|2|2|2|2|1	12	2	6	2|0|0|5	0.05	0.09	0.05	0.09	0.05	-5.48	1.14	0.54
Telomere	P11940	PABPC1	18|13|10|12|6|12	71	11.83	6	8|0|1|18	0.03	0.08	0.03	0.08	0.03	-15.07	1.75	0.54
Telomere	P12004	PCNA	6|13|3|3|3|10	38	6.33	6	3|0|0|8	0.56	0.86	0.56	0.86	0.56	-5.51	2.3	0.24
Telomere	P12081	HARS1	10|6|4|6|3|7	36	6	6	4|0|0|7	0.36	0.7	0.36	0.7	0.36	-5.62	2.18	0.3
Telomere	P12235	SLC25A4	0|0|0|1|0|0	1	0.17	6	0|0|0|0	0	0	0	0	0	-1.37	1.67	0.55
Telomere	P12236	SLC25A6	2|0|0|1|1|2	6	1	6	0|0|0|1	0.53	0.79	0.53	0.79	0.53	-1.91	4	0.25
Telomere	P12268	IMPDH2	9|6|3|4|4|8	34	5.67	6	2|1|1|12	0.04	0.08	0.04	0.08	0.04	-9.78	1.42	0.54
Telomere	P12270	TPR	43|23|3|3|3|9	84	14	6	6|0|0|35	0.28	0.85	0.28	0.85	0.28	-34.01	1.37	0.5
Telomere	P12273	PIP	0|0|1|1|0|0	2	0.33	6	1|1|1|0	0	0	0	0	0	-3.71	0.44	0.55
Telomere	P12277	CKB	14|14|10|10|9|20	77	12.83	6	9|1|2|18	0.02	0.05	0.02	0.05	0.02	-13.36	1.71	0.54
Telomere	P12429	ANXA3	8|15|9|6|3|5	46	7.67	6	9|0|2|8	0.16	0.48	0.16	0.48	0.16	-12.99	1.61	0.53
Telomere	P12532	CKMT1A	0|1|1|1|0|0	3	0.5	6	1|0|0|1	0	0	0	0	0	-2.81	1	0.55
Telomere	P12814	ACTN1	25|12|5|4|4|11	61	10.17	6	3|0|0|10	0.77	0.97	0.77	0.97	0.77	-5.66	3.13	0.08
Telomere	P12830	CDH1	0|1|0|0|0|0	1	0.17	6	0|0|0|0	0	0	0	0	0	-1.37	1.67	0.55
Telomere	P12931	SRC	3|0|0|0|0|0	3	0.5	6	0|0|0|0	0.33	0.99	0.33	0.99	0.33	-1.37	5	0.4
Telomere	P12955	PEPD	0|1|0|1|0|0	2	0.33	6	1|0|0|1	0	0	0	0	0	-2.81	0.67	0.55
Telomere	P12956	XRCC6	36|41|39|37|30|38	221	36.83	6	18|0|0|23	0.72	0.81	0.72	0.81	0.72	-2.68	3.59	0.1
Telomere	P13010	XRCC5	43|39|22|21|19|25	169	28.17	6	14|0|1|22	0.61	0.93	0.61	0.93	0.61	-7.79	3.05	0.22
Telomere	P13073	COX4I1	0|3|1|1|0|1	6	1	6	1|0|0|0	0.32	0.95	0.32	0.95	0.32	-1.91	4	0.48
Telomere	P13489	RNH1	3|5|1|3|0|3	15	2.5	6	2|0|0|2	0.58	0.87	0.58	0.87	0.58	-4.37	2.5	0.23
Telomere	P13639	EEF2	56|27|29|27|22|37	198	33	6	27|10|11|61	0	0	0	0	0	-64.05	1.21	0.55
Telomere	P13645	KRT10	29|39|22|25|45|50	210	35	6	44|46|36|10	0	0	0	0	0	-89.98	1.03	0.55
Telomere	P13646	KRT13	0|1|2|0|0|0	3	0.5	6	3|0|0|0	0.15	0.44	0.15	0.44	0.15	-3.95	0.67	0.53
Telomere	P13647	KRT5	7|26|16|16|10|13	88	14.67	6	27|20|15|0	0	0	0	0	0	-46.89	0.95	0.55
Telomere	P13667	PDIA4	6|10|5|4|3|11	39	6.5	6	3|0|0|3	0.9	0.98	0.9	0.98	0.9	-1.69	4.33	0.03
Telomere	P13693	TPT1	4|3|0|0|0|3	10	1.67	6	0|0|0|0	1	1	1	1	1	-1.37	16.67	0
Telomere	P13797	PLS3	9|1|0|1|0|0	11	1.83	6	1|0|0|4	0.31	0.94	0.31	0.94	0.31	-5.18	1.47	0.49
Telomere	P13798	APEH	8|1|0|0|0|0	9	1.5	6	0|0|0|2	0.33	0.99	0.33	0.99	0.33	-2.91	3	0.43
Telomere	P13804	ETFA	0|9|5|6|3|8	31	5.17	6	4|1|1|1	0.89	0.99	0.89	0.99	0.89	-7.66	2.95	0.04
Telomere	P13807	GYS1	4|0|1|0|0|1	6	1	6	0|0|0|3	0.26	0.77	0.26	0.77	0.26	-3.95	1.33	0.51
Telomere	P13861	PRKAR2A	5|0|0|0|0|2	7	1.17	6	0|0|0|3	0.43	0.86	0.43	0.86	0.43	-3.95	1.56	0.28
Telomere	P13929	ENO3	0|0|0|1|0|0	1	0.17	6	0|0|0|0	0	0	0	0	0	-1.37	1.67	0.55
Telomere	P13984	GTF2F2	1|2|1|1|1|1	7	1.17	6	1|0|0|0	0.26	0.79	0.26	0.79	0.26	-0.3	4.67	0.5
Telomere	P13995	MTHFD2	1|1|3|2|1|5	13	2.17	6	3|1|1|0	0.38	0.8	0.38	0.8	0.38	-3.89	1.73	0.3
Telomere	P14174	MIF	3|2|1|2|2|3	13	2.17	6	2|1|0|3	0.1	0.13	0.1	0.13	0.1	-4.83	1.44	0.53
Telomere	P14314	PRKCSH	0|7|0|1|0|2	10	1.67	6	0|0|0|0	0.65	1	0.65	1	0.65	-1.37	16.67	0.17
Telomere	P14324	FDPS	1|2|0|0|0|0	3	0.5	6	0|0|0|0	0.32	0.96	0.32	0.96	0.32	-1.37	5	0.44
Telomere	P14373	TRIM27	4|2|0|0|0|0	6	1	6	0|0|0|1	0.59	0.99	0.59	0.99	0.59	-1.91	4	0.22
Telomere	P14406	COX7A2	0|1|1|0|1|0	3	0.5	6	0|0|0|0	0	0	0	0	0	-1.37	5	0.55
Telomere	P14550	AKR1A1	6|10|3|3|3|5	30	5	6	4|0|0|7	0.29	0.7	0.29	0.7	0.29	-5.62	1.82	0.5
Telomere	P14618	PKM	49|27|27|26|26|52	207	34.5	6	26|6|10|65	0	0	0	0	0	-55.98	1.29	0.55
Telomere	P14625	HSP90B1	16|17|13|12|4|18	80	13.33	6	14|0|1|10	0.12	0.19	0.12	0.19	0.12	-16.51	2.13	0.53
Telomere	P14635	CCNB1	0|0|0|1|0|0	1	0.17	6	0|0|0|2	0	0	0	0	0	-2.91	0.33	0.55
Telomere	P14678	SNRPB	3|8|4|5|3|7	30	5	6	2|1|1|1	0.92	0.99	0.92	0.99	0.92	-1.05	4	0.03
Telomere	P14735	IDE	14|4|0|0|0|0	18	3	6	3|0|0|6	0.34	0.94	0.34	0.94	0.34	-9.23	1.33	0.31
Telomere	P14854	COX6B1	0|0|0|0|1|1	2	0.33	6	0|0|0|0	0	0	0	0	0	-1.37	3.33	0.55
Telomere	P14866	HNRNPL	18|20|8|10|2|9	67	11.17	6	1|0|0|2	1	1	1	1	1	-0.7	14.89	0
Telomere	P14868	DARS1	14|5|5|6|2|4	36	6	6	6|0|0|10	0.22	0.65	0.22	0.65	0.22	-11.58	1.5	0.52
Telomere	P14923	JUP	13|13|11|12|8|10	67	11.17	6	14|11|9|13	0	0	0	0	0	-31.2	0.95	0.55
Telomere	P15104	GLUL	0|2|0|0|0|2	4	0.67	6	1|0|0|1	0.35	0.53	0.35	0.53	0.35	-2.81	1.33	0.31
Telomere	P15121	AKR1B1	1|1|1|1|0|1	5	0.83	6	1|0|0|0	0	0	0	0	0	-1.91	3.33	0.55
Telomere	P15153	RAC2	1|0|0|0|0|0	1	0.17	6	0|0|0|1	0	0	0	0	0	-1.91	0.67	0.55
Telomere	P15170	GSPT1	7|1|0|0|1|3	12	2	6	1|0|0|0	0.65	1	0.65	1	0.65	-1.91	8	0.19
Telomere	P15311	EZR	28|30|20|25|14|37	154	25.67	6	12|2|5|17	0.57	0.94	0.57	0.94	0.57	-12.32	2.85	0.23
Telomere	P15374	UCHL3	1|2|0|0|0|0	3	0.5	6	0|0|0|0	0.32	0.96	0.32	0.96	0.32	-1.37	5	0.44
Telomere	P15531	NME1	8|16|13|9|6|16	68	11.33	6	5|1|1|7	0.91	0.95	0.91	0.95	0.91	-4.43	3.24	0.03
Telomere	P15559	NQO1	3|3|2|3|2|1	14	2.33	6	1|0|1|2	0.44	0.44	0.44	0.44	0.44	-3	2.33	0.28
Telomere	P15880	RPS2	6|5|6|6|5|9	37	6.17	6	6|0|2|4	0.2	0.49	0.2	0.49	0.2	-4.08	2.06	0.52
Telomere	P15923	TCF3	1|0|0|0|0|0	1	0.17	6	0|0|0|0	0	0	0	0	0	-1.37	1.67	0.55
Telomere	P15924	DSP	54|32|14|13|10|19	142	23.67	6	28|15|15|54	0	0	0	0	0	-90.85	0.85	0.55
Telomere	P15927	RPA2	7|6|0|1|7|4	25	4.17	6	0|0|0|1	1	1	1	1	1	-1.91	16.67	0
Telomere	P16070	CD44	2|0|1|0|0|3	6	1	6	0|0|0|0	0.65	0.99	0.65	0.99	0.65	-1.37	10	0.18
Telomere	P16104	H2AX	2|8|5|7|6|14	42	7	6	2|2|1|4	0.85	1	0.85	1	0.85	-5.97	3.11	0.05
Telomere	P16144	ITGB4	20|9|3|6|3|9	50	8.33	6	5|0|0|10	0.39	0.92	0.39	0.92	0.39	-9.18	2.22	0.29
Telomere	P16219	ACADS	0|2|0|1|0|0	3	0.5	6	2|0|0|0	0.19	0.57	0.19	0.57	0.19	-2.91	1	0.52
Telomere	P16220	CREB1	0|3|0|0|0|0	3	0.5	6	0|0|0|0	0.33	0.99	0.33	0.99	0.33	-1.37	5	0.4
Telomere	P16298	PPP3CB	1|0|0|0|0|0	1	0.17	6	0|0|0|0	0	0	0	0	0	-1.37	1.67	0.55
Telomere	P16402	H1-3	2|14|17|16|6|13	68	11.33	6	5|4|3|10	0.49	0.76	0.49	0.76	0.49	-18.21	2.06	0.26
Telomere	P16403	H1-2	0|1|1|0|0|1	3	0.5	6	0|0|0|0	0	0	0	0	0	-1.37	5	0.55
Telomere	P16422	EPCAM	1|0|0|0|0|0	1	0.17	6	0|0|0|0	0	0	0	0	0	-1.37	1.67	0.55
Telomere	P16435	POR	2|0|0|0|0|4	6	1	6	0|0|0|1	0.59	0.99	0.59	0.99	0.59	-1.91	4	0.22
Telomere	P16591	FER	2|0|0|0|0|0	2	0.33	6	0|0|0|0	0.32	0.96	0.32	0.96	0.32	-1.37	3.33	0.44
Telomere	P16615	ATP2A2	22|6|4|4|4|10	50	8.33	6	5|0|0|12	0.34	0.92	0.34	0.92	0.34	-9.24	1.96	0.31
Telomere	P16885	PLCG2	3|0|0|1|0|0	4	0.67	6	0|0|0|2	0.26	0.77	0.26	0.77	0.26	-2.91	1.33	0.51
Telomere	P16949	STMN1	2|2|2|2|1|2	11	1.83	6	1|0|0|2	0.33	0.33	0.33	0.33	0.33	-2.11	2.44	0.39
Telomere	P16989	YBX3	0|1|0|0|0|3	4	0.67	6	0|0|0|0	0.33	0.99	0.33	0.99	0.33	-1.37	6.67	0.4
Telomere	P17029	ZKSCAN1	0|1|0|0|0|0	1	0.17	6	0|0|0|0	0	0	0	0	0	-1.37	1.67	0.55
Telomere	P17096	HMGA1	0|3|0|0|0|4	7	1.17	6	0|0|0|0	0.66	1	0.66	1	0.66	-1.37	11.67	0.15
Telomere	P17174	GOT1	0|3|0|0|0|1	4	0.67	6	1|0|0|1	0.27	0.81	0.27	0.81	0.27	-2.81	1.33	0.5
Telomere	P17252	PRKCA	1|0|0|0|0|0	1	0.17	6	0|0|0|0	0	0	0	0	0	-1.37	1.67	0.55
Telomere	P17275	JUNB	1|3|0|0|0|0	4	0.67	6	0|0|0|0	0.33	0.99	0.33	0.99	0.33	-1.37	6.67	0.4
Telomere	P17301	ITGA2	2|0|0|0|0|0	2	0.33	6	0|0|0|0	0.32	0.96	0.32	0.96	0.32	-1.37	3.33	0.44
Telomere	P17480	UBTF	2|4|2|0|0|0	8	1.33	6	1|0|0|1	0.67	0.95	0.67	0.95	0.67	-2.81	2.67	0.12
Telomere	P17535	JUND	0|3|0|0|0|0	3	0.5	6	0|0|0|0	0.33	0.99	0.33	0.99	0.33	-1.37	5	0.4
Telomere	P17612	PRKACA	3|2|2|3|0|0	10	1.67	6	2|0|0|2	0.36	0.44	0.36	0.44	0.36	-4.37	1.67	0.3
Telomere	P17655	CAPN2	16|2|1|2|3|4	28	4.67	6	3|0|0|3	0.5	1	0.5	1	0.5	-4.66	3.11	0.26
Telomere	P17706	PTPN2	1|2|0|0|0|0	3	0.5	6	0|0|0|1	0.26	0.79	0.26	0.79	0.26	-1.91	2	0.5
Telomere	P17812	CTPS1	6|2|2|0|2|3	15	2.5	6	2|0|0|3	0.41	0.84	0.41	0.84	0.41	-5.38	2	0.29
Telomere	P17844	DDX5	24|29|23|22|17|23	138	23	6	12|2|2|13	0.6	0.89	0.6	0.89	0.6	-4.4	3.17	0.22
Telomere	P17858	PFKL	4|2|1|2|0|0	9	1.5	6	1|0|0|4	0.26	0.54	0.26	0.54	0.26	-5.18	1.2	0.5
Telomere	P17931	LGALS3	0|2|3|0|1|1	7	1.17	6	0|0|0|0	0.65	0.99	0.65	0.99	0.65	-1.37	11.67	0.18
Telomere	P17980	PSMC3	9|17|6|9|6|12	59	9.83	6	3|0|0|7	0.84	0.96	0.84	0.96	0.84	-1.25	3.93	0.06
Telomere	P17987	TCP1	25|16|9|12|12|21	95	15.83	6	14|2|3|23	0	0	0	0	0	-23.94	1.51	0.55
Telomere	P18031	PTPN1	5|0|0|1|0|1	7	1.17	6	1|0|0|3	0.26	0.79	0.26	0.79	0.26	-4.16	1.17	0.51
Telomere	P18074	ERCC2	4|2|0|0|0|0	6	1	6	0|0|0|1	0.59	0.99	0.59	0.99	0.59	-1.91	4	0.22
Telomere	P18077	RPL35A	0|6|3|2|0|2	13	2.17	6	1|2|2|1	0.34	0.86	0.34	0.86	0.34	-6.61	1.44	0.31
Telomere	P18085	ARF4	8|5|3|3|2|4	25	4.17	6	3|0|0|5	0.39	0.76	0.39	0.76	0.39	-4.63	2.08	0.29
Telomere	P18124	RPL7	4|17|10|16|7|12	66	11	6	7|3|2|8	0.61	0.92	0.61	0.92	0.61	-12.57	2.2	0.22
Telomere	P18206	VCL	26|18|7|3|1|16	71	11.83	6	7|0|0|24	0.15	0.45	0.15	0.45	0.15	-29.2	1.53	0.53
Telomere	P18583	SON	17|26|4|8|4|7	66	11	6	4|0|0|0	0.97	1	0.97	1	0.97	0.81	11	0.01
Telomere	P18615	NELFE	3|7|0|1|0|1	12	2	6	0|0|0|0	0.66	1	0.66	1	0.66	-1.37	20	0.15
Telomere	P18621	RPL17	1|2|5|4|2|2	16	2.67	6	2|0|0|1	0.72	0.96	0.72	0.96	0.72	-2.11	3.56	0.1
Telomere	P18669	PGAM1	9|5|1|0|0|4	19	3.17	6	1|0|1|1	0.94	1	0.94	1	0.94	-3.71	4.22	0.02
Telomere	P18754	RCC1	11|9|5|4|5|4	38	6.33	6	2|0|0|3	0.9	0.99	0.9	0.99	0.9	0.1	5.07	0.04
Telomere	P18858	LIG1	2|8|0|0|1|2	13	2.17	6	0|0|0|0	0.97	1	0.97	1	0.97	-1.37	21.67	0.01
Telomere	P18859	ATP5PF	0|2|0|0|0|0	2	0.33	6	0|0|0|0	0.32	0.96	0.32	0.96	0.32	-1.37	3.33	0.44
Telomere	P18887	XRCC1	3|2|0|0|0|0	5	0.83	6	0|0|0|0	0.65	0.99	0.65	0.99	0.65	-1.37	8.33	0.18
Telomere	P19174	PLCG1	7|0|0|0|0|0	7	1.17	6	0|0|0|1	0.33	1	0.33	1	0.33	-1.91	4.67	0.35
Telomere	P19338	NCL	13|27|24|26|23|36	149	24.83	6	21|1|2|33	0	0	0	0	0	-31.01	1.74	0.55
Telomere	P19367	HK1	6|1|1|2|1|3	14	2.33	6	0|0|0|2	0.77	0.97	0.77	0.97	0.77	-0.86	4.67	0.08
Telomere	P19387	POLR2C	1|2|0|1|1|1	6	1	6	0|0|0|0	0.32	0.96	0.32	0.96	0.32	-1.37	10	0.44
Telomere	P19388	POLR2E	0|2|0|1|0|1	4	0.67	6	0|0|0|0	0.32	0.96	0.32	0.96	0.32	-1.37	6.67	0.44
Telomere	P19404	NDUFV2	2|2|0|2|0|2	8	1.33	6	1|0|0|0	0.79	0.79	0.79	0.79	0.79	-1.91	5.33	0.07
Telomere	P19447	ERCC3	7|5|0|0|0|0	12	2	6	0|0|0|0	0.67	1	0.67	1	0.67	-1.37	20	0.13
Telomere	P19474	TRIM21	1|0|0|0|0|0	1	0.17	6	0|0|0|0	0	0	0	0	0	-1.37	1.67	0.55
Telomere	P19525	EIF2AK2	6|1|0|1|0|3	11	1.83	6	0|0|0|1	0.65	1	0.65	1	0.65	-1.91	7.33	0.19
Telomere	P19623	SRM	5|3|2|1|1|1	13	2.17	6	1|0|0|1	0.78	0.99	0.78	0.99	0.78	-1.2	4.33	0.08
Telomere	P19784	CSNK2A2	0|2|0|1|0|1	4	0.67	6	1|0|0|1	0.18	0.53	0.18	0.53	0.18	-2.81	1.33	0.52
Telomere	P19793	RXRA	1|0|0|0|0|0	1	0.17	6	0|0|0|0	0	0	0	0	0	-1.37	1.67	0.55
Telomere	P19838	NFKB1	3|0|0|0|0|1	4	0.67	6	0|0|0|2	0.26	0.77	0.26	0.77	0.26	-2.91	1.33	0.51
Telomere	P20020	ATP2B1	3|2|0|0|0|0	5	0.83	6	0|0|0|0	0.65	0.99	0.65	0.99	0.65	-1.37	8.33	0.18
Telomere	P20042	EIF2S2	5|2|2|2|1|3	15	2.5	6	2|0|0|3	0.37	0.72	0.37	0.72	0.37	-3.75	2	0.3
Telomere	P20073	ANXA7	3|6|2|0|0|1	12	2	6	1|0|0|4	0.41	0.79	0.41	0.79	0.41	-5.18	1.6	0.29
Telomere	P20226	TBP	1|0|0|0|0|0	1	0.17	6	0|0|0|0	0	0	0	0	0	-1.37	1.67	0.55
Telomere	P20248	CCNA2	1|1|0|0|0|0	2	0.33	6	0|0|0|0	0	0	0	0	0	-1.37	3.33	0.55
Telomere	P20290	BTF3	1|1|0|0|0|1	3	0.5	6	0|0|0|1	0	0	0	0	0	-1.91	2	0.55
Telomere	P20339	RAB5A	0|0|0|0|0|1	1	0.17	6	0|0|0|0	0	0	0	0	0	-1.37	1.67	0.55
Telomere	P20340	RAB6A	0|1|1|1|0|0	3	0.5	6	1|0|0|0	0	0	0	0	0	-1.91	2	0.55
Telomere	P20618	PSMB1	2|4|0|1|0|1	8	1.33	6	0|0|0|1	0.59	0.99	0.59	0.99	0.59	-1.91	5.33	0.22
Telomere	P20645	M6PR	0|1|1|1|0|0	3	0.5	6	0|0|0|0	0	0	0	0	0	-1.37	5	0.55
Telomere	P20674	COX5A	0|2|0|1|0|2	5	0.83	6	0|0|0|1	0.53	0.79	0.53	0.79	0.53	-1.91	3.33	0.25
Telomere	P20700	LMNB1	7|13|0|4|6|15	45	7.5	6	8|0|1|10	0.22	0.46	0.22	0.46	0.22	-20	1.58	0.52
Telomere	P20810	CAST	0|2|1|1|1|2	7	1.17	6	0|0|1|1	0.35	0.53	0.35	0.53	0.35	-2.81	2.33	0.31
Telomere	P20839	IMPDH1	3|0|0|0|0|0	3	0.5	6	0|0|0|1	0.32	0.95	0.32	0.95	0.32	-1.91	2	0.48
Telomere	P20936	RASA1	2|0|0|0|0|0	2	0.33	6	0|0|0|0	0.32	0.96	0.32	0.96	0.32	-1.37	3.33	0.44
Telomere	P20962	PTMS	0|0|0|0|0|1	1	0.17	6	0|0|0|0	0	0	0	0	0	-1.37	1.67	0.55
Telomere	P21281	ATP6V1B2	12|0|0|0|2|2	16	2.67	6	0|0|0|4	0.52	0.98	0.52	0.98	0.52	-3.82	2.67	0.25
Telomere	P21283	ATP6V1C1	8|2|1|0|1|1	13	2.17	6	0|0|0|2	0.52	0.99	0.52	0.99	0.52	-2.91	4.33	0.25
Telomere	P21291	CSRP1	2|0|1|0|1|1	5	0.83	6	0|0|0|1	0.26	0.79	0.26	0.79	0.26	-1.91	3.33	0.5
Telomere	P21333	FLNA	84|39|22|28|22|54	249	41.5	6	20|1|2|68	0.09	0.27	0.09	0.27	0.09	-47.45	1.82	0.53
Telomere	P21399	ACO1	4|2|0|0|0|0	6	1	6	0|0|0|3	0.41	0.77	0.41	0.77	0.41	-3.95	1.33	0.29
Telomere	P21589	NT5E	1|1|1|1|0|0	4	0.67	6	0|0|0|0	0	0	0	0	0	-1.37	6.67	0.55
Telomere	P21675	TAF1	2|1|1|0|1|1	6	1	6	0|0|0|0	0.32	0.96	0.32	0.96	0.32	-1.37	10	0.44
Telomere	P21796	VDAC1	2|5|6|6|3|11	33	5.5	6	6|0|0|2	0.62	0.89	0.62	0.89	0.62	-4.49	2.75	0.21
Telomere	P21912	SDHB	0|2|1|2|3|4	12	2	6	0|0|0|0	0.98	1	0.98	1	0.98	-1.37	20	0.01
Telomere	P21926	CD9	0|1|1|1|0|0	3	0.5	6	0|0|0|0	0	0	0	0	0	-1.37	5	0.55
Telomere	P21980	TGM2	6|0|0|0|0|0	6	1	6	0|0|0|0	0.33	1	0.33	1	0.33	-1.37	10	0.34
Telomere	P22033	MMUT	2|2|1|0|0|0	5	0.83	6	3|0|0|0	0.3	0.44	0.3	0.44	0.3	-3.95	1.11	0.5
Telomere	P22059	OSBP	12|2|1|2|1|1	19	3.17	6	2|0|0|3	0.4	1	0.4	1	0.4	-3.75	2.53	0.29
Telomere	P22061	PCMT1	3|5|1|2|0|0	11	1.83	6	0|0|0|1	0.91	1	0.91	1	0.91	-1.91	7.33	0.03
Telomere	P22087	FBL	7|4|1|1|1|1	15	2.5	6	2|0|0|3	0.48	0.91	0.48	0.91	0.48	-3.75	2	0.27
Telomere	P22102	GART	20|4|3|3|3|10	43	7.17	6	4|0|0|9	0.48	0.95	0.48	0.95	0.48	-7.32	2.21	0.27
Telomere	P22223	CDH3	5|2|1|0|1|1	10	1.67	6	0|0|0|0	0.65	1	0.65	1	0.65	-1.37	16.67	0.17
Telomere	P22234	PAICS	12|9|5|7|5|14	52	8.67	6	3|0|1|17	0.07	0.16	0.07	0.16	0.07	-11.08	1.65	0.54
Telomere	P22307	SCP2	3|1|1|1|0|2	8	1.33	6	1|0|0|1	0.45	0.81	0.45	0.81	0.45	-2.81	2.67	0.28
Telomere	P22314	UBA1	21|20|5|6|9|13	74	12.33	6	6|0|0|14	0.59	0.84	0.59	0.84	0.59	-10.31	2.47	0.23
Telomere	P22392	NME2	3|5|2|2|2|2	16	2.67	6	1|0|0|2	0.64	0.96	0.64	0.96	0.64	-0.7	3.56	0.2
Telomere	P22570	FDXR	2|7|8|5|4|10	36	6	6	6|0|1|1	0.75	0.86	0.75	0.86	0.75	-4.53	3	0.09
Telomere	P22626	HNRNPA2B1	10|21|21|18|16|22	108	18	6	4|1|2|10	0.96	0.97	0.96	0.97	0.96	-2.47	4.24	0.02
Telomere	P22670	RFX1	2|7|0|0|0|0	9	1.5	6	0|0|0|0	0.65	1	0.65	1	0.65	-1.37	15	0.17
Telomere	P22681	CBL	4|0|0|0|0|1	5	0.83	6	0|0|0|0	0.33	1	0.33	1	0.33	-1.37	8.33	0.37
Telomere	P22694	PRKACB	2|0|1|0|0|0	3	0.5	6	1|0|0|1	0.18	0.53	0.18	0.53	0.18	-2.81	1	0.52
Telomere	P22695	UQCRC2	3|3|2|4|2|8	22	3.67	6	3|0|1|2	0.5	0.99	0.5	0.99	0.5	-3.36	2.44	0.26
Telomere	P22735	TGM1	0|1|0|0|0|0	1	0.17	6	3|1|3|0	0	0	0	0	0	-7.66	0.1	0.55
Telomere	P22830	FECH	0|2|1|1|1|0	5	0.83	6	1|0|0|0	0.26	0.79	0.26	0.79	0.26	-1.91	3.33	0.5
Telomere	P23193	TCEA1	2|4|0|1|0|2	9	1.5	6	1|0|0|4	0.26	0.54	0.26	0.54	0.26	-5.18	1.2	0.5
Telomere	P23229	ITGA6	3|1|0|0|0|2	6	1	6	0|0|0|0	0.65	0.99	0.65	0.99	0.65	-1.37	10	0.18
Telomere	P23246	SFPQ	26|21|11|11|6|16	91	15.17	6	7|0|0|5	0.97	0.99	0.97	0.99	0.97	-2.68	5.06	0.01
Telomere	P23258	TUBG1	3|2|3|1|0|0	9	1.5	6	1|0|0|5	0.16	0.2	0.16	0.2	0.16	-6.24	1	0.53
Telomere	P23284	PPIB	0|6|5|4|3|5	23	3.83	6	2|0|0|3	0.76	0.84	0.76	0.84	0.76	-5.38	3.07	0.09
Telomere	P23368	ME2	3|6|3|2|2|5	21	3.5	6	2|0|0|0	0.89	0.97	0.89	0.97	0.89	0.29	7	0.04
Telomere	P23381	WARS1	4|1|0|1|2|1	9	1.5	6	1|0|0|0	0.59	0.99	0.59	0.99	0.59	-1.91	6	0.22
Telomere	P23396	RPS3	11|12|15|17|8|23	86	14.33	6	12|7|2|12	0.05	0.15	0.05	0.15	0.05	-18.01	1.74	0.54
Telomere	P23443	RPS6KB1	0|1|0|0|0|0	1	0.17	6	0|0|0|0	0	0	0	0	0	-1.37	1.67	0.55
Telomere	P23458	JAK1	2|0|0|0|0|0	2	0.33	6	0|0|0|0	0.32	0.96	0.32	0.96	0.32	-1.37	3.33	0.44
Telomere	P23497	SP100	0|1|1|0|1|1	4	0.67	6	0|0|0|1	0	0	0	0	0	-1.91	2.67	0.55
Telomere	P23511	NFYA	0|1|0|0|0|0	1	0.17	6	0|0|0|0	0	0	0	0	0	-1.37	1.67	0.55
Telomere	P23526	AHCY	18|11|4|5|3|12	53	8.83	6	6|2|2|11	0.25	0.7	0.25	0.7	0.25	-14.87	1.68	0.52
Telomere	P23528	CFL1	6|9|5|5|6|9	40	6.67	6	5|1|0|10	0.05	0.07	0.05	0.07	0.05	-7.02	1.67	0.54
Telomere	P23588	EIF4B	6|3|4|4|1|10	28	4.67	6	1|0|0|2	0.95	1	0.95	1	0.95	-2.11	6.22	0.02
Telomere	P23743	DGKA	1|0|0|0|0|0	1	0.17	6	0|0|0|1	0	0	0	0	0	-1.91	0.67	0.55
Telomere	P23786	CPT2	0|0|0|0|0|1	1	0.17	6	0|0|0|0	0	0	0	0	0	-1.37	1.67	0.55
Telomere	P23919	DTYMK	1|1|0|0|0|1	3	0.5	6	0|0|0|1	0	0	0	0	0	-1.91	2	0.55
Telomere	P23921	RRM1	15|3|1|1|4|6	30	5	6	0|0|0|8	0.56	0.93	0.56	0.93	0.56	-5.57	2.5	0.24
Telomere	P24386	CHM	1|0|0|0|0|0	1	0.17	6	0|0|0|0	0	0	0	0	0	-1.37	1.67	0.55
Telomere	P24468	NR2F2	2|1|1|0|1|1	6	1	6	0|0|0|0	0.32	0.96	0.32	0.96	0.32	-1.37	10	0.44
Telomere	P24534	EEF1B2	12|6|3|6|4|8	39	6.5	6	2|0|1|7	0.55	0.88	0.55	0.88	0.55	-4.76	2.6	0.24
Telomere	P24539	ATP5PB	1|3|3|4|4|4	19	3.17	6	3|1|1|2	0.2	0.2	0.2	0.2	0.2	-5.7	1.81	0.52
Telomere	P24666	ACP1	3|4|4|3|1|1	16	2.67	6	2|1|1|2	0.28	0.36	0.28	0.36	0.28	-4.8	1.78	0.5
Telomere	P24752	ACAT1	1|6|3|3|1|8	22	3.67	6	5|0|0|2	0.51	0.82	0.51	0.82	0.51	-5.48	2.1	0.26
Telomere	P24863	CCNC	1|2|0|0|0|0	3	0.5	6	0|0|0|0	0.32	0.96	0.32	0.96	0.32	-1.37	5	0.44
Telomere	P24928	POLR2A	17|34|11|10|7|5	84	14	6	0|0|0|2	1	1	1	1	1	2.81	28	0
Telomere	P24941	CDK2	3|3|0|0|0|0	6	1	6	0|0|0|1	0.63	0.95	0.63	0.95	0.63	-1.91	4	0.21
Telomere	P25098	GRK2	1|0|0|0|0|0	1	0.17	6	0|0|0|1	0	0	0	0	0	-1.91	0.67	0.55
Telomere	P25205	MCM3	24|26|8|10|12|14	94	15.67	6	7|0|1|11	0.74	0.96	0.74	0.96	0.74	-5.73	3.3	0.09
Telomere	P25208	NFYB	0|1|0|0|0|0	1	0.17	6	0|0|0|0	0	0	0	0	0	-1.37	1.67	0.55
Telomere	P25325	MPST	0|1|0|0|0|1	2	0.33	6	0|0|0|1	0	0	0	0	0	-1.91	1.33	0.55
Telomere	P25398	RPS12	1|1|1|1|1|1	6	1	6	1|0|0|3	0	0	0	0	0	-2.76	1	0.55
Telomere	P25440	BRD2	6|5|0|1|0|0	12	2	6	0|0|0|1	0.67	1	0.67	1	0.67	-1.91	8	0.14
Telomere	P25490	YY1	2|4|0|1|1|1	9	1.5	6	0|0|0|0	0.65	1	0.65	1	0.65	-1.37	15	0.17
Telomere	P25685	DNAJB1	4|9|3|4|2|8	30	5	6	6|1|1|9	0.02	0.03	0.02	0.03	0.02	-12.86	1.18	0.54
Telomere	P25705	ATP5F1A	13|17|18|21|16|22	107	17.83	6	17|7|7|11	0	0	0	0	0	-18.88	1.7	0.55
Telomere	P25786	PSMA1	2|7|0|0|0|2	11	1.83	6	1|0|0|1	0.69	1	0.69	1	0.69	-2.81	3.67	0.11
Telomere	P25787	PSMA2	4|3|1|1|1|3	13	2.17	6	0|0|0|2	0.81	0.88	0.81	0.88	0.81	-0.86	4.33	0.07
Telomere	P25788	PSMA3	2|6|0|0|1|1	10	1.67	6	0|0|0|1	0.6	1	0.6	1	0.6	-1.91	6.67	0.22
Telomere	P25789	PSMA4	1|6|1|1|1|3	13	2.17	6	1|0|0|2	0.54	0.99	0.54	0.99	0.54	-2.11	2.89	0.24
Telomere	P26006	ITGA3	4|2|0|1|0|2	9	1.5	6	0|0|0|0	0.97	1	0.97	1	0.97	-1.37	15	0.01
Telomere	P26038	MSN	14|5|4|4|4|9	40	6.67	6	2|0|0|4	0.83	0.99	0.83	0.99	0.83	-0.53	4.44	0.06
Telomere	P26196	DDX6	14|4|4|4|4|8	38	6.33	6	4|0|0|12	0.23	0.65	0.23	0.65	0.23	-8.29	1.58	0.52
Telomere	P26358	DNMT1	23|9|4|4|4|6	50	8.33	6	3|0|0|4	0.84	1	0.84	1	0.84	-1.26	4.76	0.06
Telomere	P26368	U2AF2	17|8|6|8|11|10	60	10	6	7|0|0|6	0.67	0.93	0.67	0.93	0.67	-3.41	3.08	0.12
Telomere	P26373	RPL13	3|9|8|13|5|10	48	8	6	10|9|6|6	0	0	0	0	0	-25.27	1.03	0.55
Telomere	P26440	IVD	0|2|1|1|0|0	4	0.67	6	1|0|0|0	0.26	0.79	0.26	0.79	0.26	-1.91	2.67	0.5
Telomere	P26447	S100A4	1|3|3|5|3|3	18	3	6	2|0|0|1	0.74	0.96	0.74	0.96	0.74	-2.11	4	0.09
Telomere	P26572	MGAT1	2|0|0|0|0|0	2	0.33	6	0|0|0|0	0.32	0.96	0.32	0.96	0.32	-1.37	3.33	0.44
Telomere	P26583	HMGB2	0|8|1|2|0|2	13	2.17	6	0|0|0|0	0.97	1	0.97	1	0.97	-1.37	21.67	0.01
Telomere	P26599	PTBP1	11|15|3|5|7|10	51	8.5	6	2|0|0|10	0.73	0.88	0.73	0.88	0.73	-6.24	2.83	0.09
Telomere	P26639	TARS1	11|9|4|4|7|9	44	7.33	6	2|0|0|7	0.79	0.85	0.79	0.85	0.79	-2.47	3.26	0.07
Telomere	P26640	VARS1	29|9|7|5|4|13	67	11.17	6	7|0|0|15	0.33	0.93	0.33	0.93	0.33	-13.66	2.03	0.43
Telomere	P26641	EEF1G	24|9|10|10|10|18	81	13.5	6	10|2|2|8	0.54	0.97	0.54	0.97	0.54	-7.2	2.45	0.25
Telomere	P27144	AK4	1|3|0|1|1|1	7	1.17	6	0|0|0|0	0.33	0.99	0.33	0.99	0.33	-1.37	11.67	0.4
Telomere	P27338	MAOB	4|0|0|0|0|0	4	0.67	6	0|0|0|0	0.33	1	0.33	1	0.33	-1.37	6.67	0.37
Telomere	P27348	YWHAQ	5|5|1|1|3|5	20	3.33	6	1|0|1|5	0.43	0.43	0.43	0.43	0.43	-5.52	1.9	0.28
Telomere	P27361	MAPK3	2|1|0|0|0|0	3	0.5	6	0|0|0|0	0.32	0.96	0.32	0.96	0.32	-1.37	5	0.44
Telomere	P27540	ARNT	1|1|0|0|0|0	2	0.33	6	0|0|0|0	0	0	0	0	0	-1.37	3.33	0.55
Telomere	P27635	RPL10	2|5|7|8|5|9	36	6	6	9|1|3|2	0.06	0.12	0.06	0.12	0.06	-11.07	1.6	0.54
Telomere	P27694	RPA1	12|12|4|5|3|4	40	6.67	6	5|0|0|5	0.62	0.89	0.62	0.89	0.62	-4.84	2.67	0.21
Telomere	P27695	APEX1	4|7|4|4|2|3	24	4	6	2|0|0|3	0.65	0.91	0.65	0.91	0.65	-2.2	3.2	0.17
Telomere	P27707	DCK	1|3|1|1|0|0	6	1	6	1|0|0|0	0.32	0.95	0.32	0.95	0.32	-1.91	4	0.48
Telomere	P27708	CAD	39|5|12|11|6|13	86	14.33	6	13|0|0|34	0.08	0.24	0.08	0.24	0.08	-35.68	1.22	0.54
Telomere	P27797	CALR	2|2|3|2|1|4	14	2.33	6	0|0|0|0	0.98	1	0.98	1	0.98	1.14	23.33	0.01
Telomere	P27816	MAP4	25|15|19|16|3|11	89	14.83	6	4|0|0|7	0.97	0.99	0.97	0.99	0.97	-5.62	5.39	0.01
Telomere	P27824	CANX	6|14|15|13|9|12	69	11.5	6	5|0|1|8	0.82	0.87	0.82	0.87	0.82	-4.24	3.29	0.06
Telomere	P27986	PIK3R1	1|0|0|0|0|0	1	0.17	6	0|0|0|0	0	0	0	0	0	-1.37	1.67	0.55
Telomere	P28066	PSMA5	3|6|2|3|2|3	19	3.17	6	1|0|0|1	0.87	1	0.87	1	0.87	0.13	6.33	0.04
Telomere	P28070	PSMB4	2|2|0|0|0|0	4	0.67	6	0|0|0|0	0.64	0.96	0.64	0.96	0.64	-1.37	6.67	0.2
Telomere	P28072	PSMB6	1|2|0|0|0|1	4	0.67	6	0|0|0|0	0.32	0.96	0.32	0.96	0.32	-1.37	6.67	0.44
Telomere	P28074	PSMB5	3|5|0|1|0|3	12	2	6	0|0|0|0	1	1	1	1	1	-1.37	20	0
Telomere	P28288	ABCD3	8|1|0|1|0|1	11	1.83	6	0|0|0|4	0.31	0.92	0.31	0.92	0.31	-3.82	1.83	0.49
Telomere	P28290	ITPRID2	36|9|2|1|3|10	61	10.17	6	2|0|0|20	0.32	0.95	0.32	0.95	0.32	-19.56	1.85	0.48
Telomere	P28331	NDUFS1	7|6|4|3|1|4	25	4.17	6	4|0|0|0	0.81	0.89	0.81	0.89	0.81	-2.41	4.17	0.07
Telomere	P28340	POLD1	15|9|1|1|0|0	26	4.33	6	1|0|0|3	0.66	1	0.66	1	0.66	-4.16	4.33	0.16
Telomere	P28347	TEAD1	2|2|0|1|0|0	5	0.83	6	0|0|0|0	0.64	0.96	0.64	0.96	0.64	-1.37	8.33	0.2
Telomere	P28370	SMARCA1	6|3|0|0|0|0	9	1.5	6	0|0|0|0	0.66	1	0.66	1	0.66	-1.37	15	0.15
Telomere	P28482	MAPK1	7|3|1|1|0|3	15	2.5	6	1|0|0|3	0.62	0.94	0.62	0.94	0.62	-4.16	2.5	0.21
Telomere	P28702	RXRB	1|2|0|0|0|0	3	0.5	6	0|0|0|0	0.32	0.96	0.32	0.96	0.32	-1.37	5	0.44
Telomere	P28715	ERCC5	1|0|0|0|0|0	1	0.17	6	0|0|0|0	0	0	0	0	0	-1.37	1.67	0.55
Telomere	P28749	RBL1	2|0|0|0|0|0	2	0.33	6	0|0|0|0	0.32	0.96	0.32	0.96	0.32	-1.37	3.33	0.44
Telomere	P28838	LAP3	4|4|3|3|2|3	19	3.17	6	4|0|0|2	0.3	0.37	0.3	0.37	0.3	-2.91	2.11	0.49
Telomere	P29083	GTF2E1	2|3|0|0|0|0	5	0.83	6	0|0|0|0	0.65	0.99	0.65	0.99	0.65	-1.37	8.33	0.18
Telomere	P29144	TPP2	6|0|0|0|0|0	6	1	6	0|0|0|3	0.3	0.91	0.3	0.91	0.3	-3.95	1.33	0.49
Telomere	P29218	IMPA1	2|2|1|1|0|0	6	1	6	0|0|0|0	0.64	0.96	0.64	0.96	0.64	-1.37	10	0.2
Telomere	P29317	EPHA2	11|5|0|1|0|2	19	3.17	6	0|0|0|1	0.93	1	0.93	1	0.93	-1.91	12.67	0.02
Telomere	P29350	PTPN6	3|1|0|0|0|0	4	0.67	6	0|0|0|0	0.33	0.99	0.33	0.99	0.33	-1.37	6.67	0.4
Telomere	P29353	SHC1	3|1|0|0|0|0	4	0.67	6	0|0|0|1	0.32	0.95	0.32	0.95	0.32	-1.91	2.67	0.48
Telomere	P29373	CRABP2	1|3|0|0|1|4	9	1.5	6	2|0|0|3	0.27	0.52	0.27	0.52	0.27	-5.38	1.2	0.5
Telomere	P29401	TKT	18|25|11|11|16|31	112	18.67	6	8|1|1|17	0.57	0.92	0.57	0.92	0.57	-8.43	2.77	0.24
Telomere	P29590	PML	2|6|0|0|0|0	8	1.33	6	0|0|0|1	0.6	1	0.6	1	0.6	-1.91	5.33	0.22
Telomere	P29692	EEF1D	11|7|3|2|2|6	31	5.17	6	5|0|0|4	0.58	0.89	0.58	0.89	0.58	-5.55	2.3	0.23
Telomere	P29966	MARCKS	0|0|0|0|0|3	3	0.5	6	0|0|0|0	0.33	0.99	0.33	0.99	0.33	-1.37	5	0.4
Telomere	P29992	GNA11	0|1|1|1|2|1	6	1	6	0|0|0|1	0.26	0.79	0.26	0.79	0.26	-1.91	4	0.5
Telomere	P30038	ALDH4A1	0|0|0|0|1|0	1	0.17	6	1|0|0|0	0	0	0	0	0	-1.91	0.67	0.55
Telomere	P30040	ERP29	0|1|0|0|0|0	1	0.17	6	0|0|0|0	0	0	0	0	0	-1.37	1.67	0.55
Telomere	P30041	PRDX6	6|10|4|5|3|2	30	5	6	4|1|0|2	0.69	0.98	0.69	0.98	0.69	-4.02	2.86	0.11
Telomere	P30043	BLVRB	2|4|0|3|2|2	13	2.17	6	1|0|0|0	0.91	0.99	0.91	0.99	0.91	-1.91	8.67	0.03
Telomere	P30044	PRDX5	2|5|4|5|1|4	21	3.5	6	5|1|2|4	0.01	0.01	0.01	0.01	0.01	-10.46	1.17	0.54
Telomere	P30048	PRDX3	2|8|6|5|4|7	32	5.33	6	7|3|2|4	0.01	0.03	0.01	0.03	0.01	-12.4	1.33	0.54
Telomere	P30050	RPL12	2|5|1|1|1|6	16	2.67	6	2|0|1|3	0.54	0.9	0.54	0.9	0.54	-4.83	1.78	0.24
Telomere	P30084	ECHS1	1|2|1|2|2|3	11	1.83	6	2|0|0|0	0.64	0.77	0.64	0.77	0.64	-0.86	3.67	0.21
Telomere	P30085	CMPK1	6|2|0|0|0|0	8	1.33	6	0|0|0|0	0.65	1	0.65	1	0.65	-1.37	13.33	0.17
Telomere	P30086	PEBP1	3|2|3|1|2|5	16	2.67	6	2|0|0|4	0.31	0.58	0.31	0.58	0.31	-4.59	1.78	0.49
Telomere	P30101	PDIA3	7|15|11|9|7|14	63	10.5	6	4|0|0|5	0.94	0.97	0.94	0.97	0.94	0.07	4.67	0.02
Telomere	P30153	PPP2R1A	14|7|3|2|5|7	38	6.33	6	4|0|0|11	0.26	0.73	0.26	0.73	0.26	-10.76	1.69	0.51
Telomere	P30154	PPP2R1B	4|1|0|0|0|0	5	0.83	6	0|0|0|0	0.33	1	0.33	1	0.33	-1.37	8.33	0.37
Telomere	P30260	CDC27	9|3|0|0|0|0	12	2	6	0|0|0|1	0.65	1	0.65	1	0.65	-1.91	8	0.19
Telomere	P30291	WEE1	0|1|0|0|0|0	1	0.17	6	0|0|0|0	0	0	0	0	0	-1.37	1.67	0.55
Telomere	P30405	PPIF	0|1|2|1|0|0	4	0.67	6	1|0|0|0	0.26	0.79	0.26	0.79	0.26	-1.91	2.67	0.5
Telomere	P30414	NKTR	0|1|0|0|0|0	1	0.17	6	0|0|0|0	0	0	0	0	0	-1.37	1.67	0.55
Telomere	P30419	NMT1	4|1|1|1|0|0	7	1.17	6	0|0|0|3	0.26	0.77	0.26	0.77	0.26	-3.95	1.56	0.51
Telomere	P30519	HMOX2	1|1|1|1|0|1	5	0.83	6	0|0|0|2	0	0	0	0	0	-2.91	1.67	0.55
Telomere	P30520	ADSS2	6|3|0|3|0|4	16	2.67	6	1|0|0|3	0.67	0.88	0.67	0.88	0.67	-4.16	2.67	0.12
Telomere	P30566	ADSL	4|1|0|0|1|4	10	1.67	6	1|0|0|4	0.36	0.54	0.36	0.54	0.36	-5.18	1.33	0.3
Telomere	P30622	CLIP1	10|1|0|0|1|1	13	2.17	6	0|0|0|3	0.33	0.98	0.33	0.98	0.33	-3.95	2.89	0.43
Telomere	P30626	SRI	1|1|0|0|0|0	2	0.33	6	0|0|0|0	0	0	0	0	0	-1.37	3.33	0.55
Telomere	P30740	SERPINB1	4|0|0|0|0|0	4	0.67	6	0|0|0|1	0.33	0.99	0.33	0.99	0.33	-1.91	2.67	0.43
Telomere	P30837	ALDH1B1	1|4|4|4|3|5	21	3.5	6	3|0|0|0	0.8	0.86	0.8	0.86	0.8	-1.58	4.67	0.07
Telomere	P30876	POLR2B	17|22|6|5|2|5	57	9.5	6	1|0|0|5	0.9	1	0.9	1	0.9	-2.67	6.33	0.03
Telomere	P30989	NTSR1	1|0|0|0|0|0	1	0.17	6	0|0|0|0	0	0	0	0	0	-1.37	1.67	0.55
Telomere	P31040	SDHA	2|3|1|1|2|6	15	2.5	6	1|1|0|0	0.78	1	0.78	1	0.78	-1.2	5	0.08
Telomere	P31146	CORO1A	2|0|0|0|0|0	2	0.33	6	0|0|0|0	0.32	0.96	0.32	0.96	0.32	-1.37	3.33	0.44
Telomere	P31150	GDI1	7|4|3|2|0|0	16	2.67	6	0|0|0|4	0.7	0.89	0.7	0.89	0.7	-3.82	2.67	0.11
Telomere	P31153	MAT2A	6|9|5|4|3|1	28	4.67	6	2|0|0|4	0.74	0.93	0.74	0.93	0.74	-4.59	3.11	0.09
Telomere	P31327	CPS1	2|2|0|0|1|1	6	1	6	1|0|0|0	0.53	0.79	0.53	0.79	0.53	-1.91	4	0.25
Telomere	P31350	RRM2	7|3|2|4|1|4	21	3.5	6	2|1|1|6	0.14	0.38	0.14	0.38	0.14	-8.27	1.4	0.53
Telomere	P31483	TIA1	1|0|0|0|0|0	1	0.17	6	0|0|0|0	0	0	0	0	0	-1.37	1.67	0.55
Telomere	P31689	DNAJA1	11|4|1|0|2|4	22	3.67	6	2|0|0|5	0.47	0.93	0.47	0.93	0.47	-7.44	2.1	0.27
Telomere	P31930	UQCRC1	2|5|0|1|2|6	16	2.67	6	2|0|0|0	0.83	0.97	0.83	0.97	0.83	-2.91	5.33	0.06
Telomere	P31937	HIBADH	0|2|1|1|1|0	5	0.83	6	2|0|0|0	0.19	0.57	0.19	0.57	0.19	-2.91	1.67	0.52
Telomere	P31939	ATIC	13|8|2|5|4|9	41	6.83	6	2|0|0|9	0.63	0.86	0.63	0.86	0.63	-7.14	2.48	0.21
Telomere	P31942	HNRNPH3	2|6|5|2|5|7	27	4.5	6	1|0|0|2	0.98	1	0.98	1	0.98	-0.7	6	0.01
Telomere	P31943	HNRNPH1	8|17|5|8|5|10	53	8.83	6	2|0|0|2	1	1	1	1	1	1.89	8.83	0
Telomere	P31944	CASP14	0|1|1|3|0|0	5	0.83	6	4|3|2|0	0	0.01	0	0.01	0	-9.7	0.37	0.54
Telomere	P31946	YWHAB	5|5|1|0|1|5	17	2.83	6	0|0|0|3	0.86	0.86	0.86	0.86	0.86	-3.95	3.78	0.05
Telomere	P31947	SFN	2|1|0|1|0|1	5	0.83	6	0|0|0|1	0.26	0.79	0.26	0.79	0.26	-1.91	3.33	0.5
Telomere	P31948	STIP1	21|22|12|11|8|19	93	15.5	6	8|2|1|21	0.04	0.06	0.04	0.06	0.04	-16.44	1.94	0.54
Telomere	P31949	S100A11	1|1|1|0|0|1	4	0.67	6	0|0|0|0	0	0	0	0	0	-1.37	6.67	0.55
Telomere	P32019	INPP5B	1|0|0|0|0|0	1	0.17	6	0|0|0|0	0	0	0	0	0	-1.37	1.67	0.55
Telomere	P32119	PRDX2	1|6|3|5|4|5	24	4	6	1|1|0|4	0.64	0.75	0.64	0.75	0.64	-4.66	2.67	0.21
Telomere	P32121	ARRB2	2|0|0|0|0|0	2	0.33	6	0|0|0|0	0.32	0.96	0.32	0.96	0.32	-1.37	3.33	0.44
Telomere	P32322	PYCR1	2|6|4|4|2|4	22	3.67	6	4|1|1|4	0.09	0.22	0.09	0.22	0.09	-6.87	1.47	0.53
Telomere	P32519	ELF1	0|2|0|0|0|0	2	0.33	6	0|0|0|0	0.32	0.96	0.32	0.96	0.32	-1.37	3.33	0.44
Telomere	P32780	GTF2H1	1|0|0|0|0|0	1	0.17	6	0|0|0|0	0	0	0	0	0	-1.37	1.67	0.55
Telomere	P32969	RPL9	2|6|2|4|6|8	28	4.67	6	2|0|0|2	0.97	0.99	0.97	0.99	0.97	-1.51	4.67	0.01
Telomere	P33176	KIF5B	36|1|2|3|2|8	52	8.67	6	4|0|0|12	0.34	0.99	0.34	0.99	0.34	-13.55	2.17	0.31
Telomere	P33240	CSTF2	1|4|0|1|1|1	8	1.33	6	0|0|0|1	0.33	0.99	0.33	0.99	0.33	-1.91	5.33	0.43
Telomere	P33316	DUT	0|2|0|0|1|2	5	0.83	6	1|0|0|1	0.35	0.53	0.35	0.53	0.35	-2.81	1.67	0.31
Telomere	P33527	ABCC1	4|0|0|0|0|0	4	0.67	6	0|0|0|1	0.33	0.99	0.33	0.99	0.33	-1.91	2.67	0.43
Telomere	P33552	CKS2	0|1|0|0|0|0	1	0.17	6	0|0|0|0	0	0	0	0	0	-1.37	1.67	0.55
Telomere	P33908	MAN1A1	1|0|0|0|0|0	1	0.17	6	0|0|0|1	0	0	0	0	0	-1.91	0.67	0.55
Telomere	P33981	TTK	5|0|0|0|0|0	5	0.83	6	0|0|0|0	0.33	1	0.33	1	0.33	-1.37	8.33	0.35
Telomere	P33991	MCM4	15|17|3|5|3|12	55	9.17	6	4|0|0|6	0.93	0.97	0.93	0.97	0.93	-4.8	3.67	0.02
Telomere	P33992	MCM5	16|18|14|16|11|21	96	16	6	8|0|0|11	0.74	0.88	0.74	0.88	0.74	-2.82	3.37	0.09
Telomere	P33993	MCM7	24|14|9|8|4|7	66	11	6	7|0|0|9	0.56	0.96	0.56	0.96	0.56	-8.48	2.75	0.24
Telomere	P34896	SHMT1	3|0|0|0|0|0	3	0.5	6	0|0|0|1	0.32	0.95	0.32	0.95	0.32	-1.91	2	0.48
Telomere	P34897	SHMT2	7|11|15|11|12|14	70	11.67	6	12|3|3|6	0.03	0.06	0.03	0.06	0.03	-11.46	1.94	0.54
Telomere	P34913	EPHX2	1|0|0|0|1|0	2	0.33	6	0|0|0|0	0	0	0	0	0	-1.37	3.33	0.55
Telomere	P34931	HSPA1L	0|1|0|0|2|1	4	0.67	6	0|0|0|0	0.32	0.96	0.32	0.96	0.32	-1.37	6.67	0.44
Telomere	P34932	HSPA4	34|23|9|10|8|19	103	17.17	6	7|0|0|15	0.8	0.96	0.8	0.96	0.8	-7.88	3.12	0.07
Telomere	P35030	PRSS3	0|1|1|1|0|0	3	0.5	6	1|1|0|0	0	0	0	0	0	-2.81	1	0.55
Telomere	P35080	PFN2	0|2|1|1|0|1	5	0.83	6	0|0|0|0	0.32	0.96	0.32	0.96	0.32	-1.37	8.33	0.44
Telomere	P35221	CTNNA1	22|9|1|2|2|6	42	7	6	1|0|0|10	0.58	0.96	0.58	0.96	0.58	-8.77	2.55	0.23
Telomere	P35222	CTNNB1	16|5|2|5|3|5	36	6	6	1|0|0|4	0.8	1	0.8	1	0.8	-1.93	4.8	0.07
Telomere	P35227	PCGF2	1|0|0|0|0|0	1	0.17	6	0|0|0|0	0	0	0	0	0	-1.37	1.67	0.55
Telomere	P35232	PHB	5|5|5|5|7|12	39	6.5	6	5|3|1|7	0.21	0.63	0.21	0.63	0.21	-7.62	1.62	0.52
Telomere	P35237	SERPINB6	2|3|1|2|0|1	9	1.5	6	0|0|0|2	0.64	0.77	0.64	0.77	0.64	-2.91	3	0.21
Telomere	P35240	NF2	3|0|0|0|0|0	3	0.5	6	0|0|0|0	0.33	0.99	0.33	0.99	0.33	-1.37	5	0.4
Telomere	P35241	RDX	7|1|0|1|0|0	9	1.5	6	0|0|0|1	0.33	1	0.33	1	0.33	-1.91	6	0.35
Telomere	P35244	RPA3	3|3|0|0|0|0	6	1	6	1|0|0|1	0.54	0.81	0.54	0.81	0.54	-2.81	2	0.24
Telomere	P35249	RFC4	8|5|2|4|1|4	24	4	6	4|0|0|5	0.3	0.67	0.3	0.67	0.3	-7.1	1.78	0.49
Telomere	P35250	RFC2	10|3|0|0|1|3	17	2.83	6	0|0|0|2	0.85	1	0.85	1	0.85	-2.91	5.67	0.06
Telomere	P35251	RFC1	12|8|1|1|1|1	24	4	6	1|0|0|1	0.67	1	0.67	1	0.67	-1.2	8	0.13
Telomere	P35268	RPL22	2|1|1|1|0|2	7	1.17	6	1|0|0|0	0.53	0.79	0.53	0.79	0.53	-1.91	4.67	0.25
Telomere	P35269	GTF2F1	3|7|0|0|0|1	11	1.83	6	0|0|0|0	0.66	1	0.66	1	0.66	-1.37	18.33	0.15
Telomere	P35270	SPR	1|5|2|3|3|3	17	2.83	6	1|0|0|1	0.87	0.99	0.87	0.99	0.87	-1.2	5.67	0.04
Telomere	P35527	KRT9	19|44|29|38|21|24	175	29.17	6	72|50|32|14	0	0	0	0	0	-127.34	0.69	0.55
Telomere	P35568	IRS1	1|0|0|0|0|0	1	0.17	6	0|0|0|0	0	0	0	0	0	-1.37	1.67	0.55
Telomere	P35573	AGL	17|3|1|1|1|1	24	4	6	2|0|0|5	0.36	0.99	0.36	0.99	0.36	-5.48	2.29	0.3
Telomere	P35579	MYH9	112|47|21|22|26|60	288	48	6	33|2|4|92	0	0.01	0	0.01	0	-86.1	1.47	0.55
Telomere	P35580	MYH10	35|2|1|3|0|4	45	7.5	6	0|0|0|20	0.32	0.95	0.32	0.95	0.32	-20.27	1.5	0.48
Telomere	P35606	COPB2	29|4|2|2|1|6	44	7.33	6	4|1|0|16	0.31	0.93	0.31	0.93	0.31	-18.7	1.4	0.49
Telomere	P35611	ADD1	8|0|1|0|0|0	9	1.5	6	0|0|0|1	0.33	1	0.33	1	0.33	-1.91	6	0.33
Telomere	P35613	BSG	1|5|0|0|0|2	8	1.33	6	0|0|0|1	0.6	1	0.6	1	0.6	-1.91	5.33	0.22
Telomere	P35637	FUS	5|14|5|9|9|5	47	7.83	6	1|0|1|3	1	1	1	1	1	1.36	6.27	0
Telomere	P35658	NUP214	27|0|0|0|0|0	27	4.5	6	0|0|0|7	0.33	0.99	0.33	0.99	0.33	-7.19	2.57	0.43
Telomere	P35659	DEK	2|3|0|0|0|3	8	1.33	6	0|0|0|2	0.7	0.77	0.7	0.77	0.7	-2.91	2.67	0.11
Telomere	P35908	KRT2	20|38|27|26|33|33	177	29.5	6	45|45|31|4	0	0	0	0	0	-82.91	0.94	0.55
Telomere	P35914	HMGCL	0|0|0|0|0|1	1	0.17	6	0|0|0|0	0	0	0	0	0	-1.37	1.67	0.55
Telomere	P35998	PSMC2	18|20|11|4|7|11	71	11.83	6	5|0|0|8	0.84	0.96	0.84	0.96	0.84	-5.85	3.64	0.06
Telomere	P36405	ARL3	1|1|1|1|0|0	4	0.67	6	0|0|0|0	0	0	0	0	0	-1.37	6.67	0.55
Telomere	P36507	MAP2K2	3|0|0|0|0|0	3	0.5	6	0|0|0|1	0.32	0.95	0.32	0.95	0.32	-1.91	2	0.48
Telomere	P36542	ATP5F1C	4|4|5|3|2|3	21	3.5	6	3|0|0|1	0.71	0.79	0.71	0.79	0.71	-1.28	3.5	0.1
Telomere	P36543	ATP6V1E1	1|0|0|0|0|1	2	0.33	6	0|0|0|0	0	0	0	0	0	-1.37	3.33	0.55
Telomere	P36551	CPOX	4|7|10|10|9|14	54	9	6	11|1|3|7	0.03	0.09	0.03	0.09	0.03	-14.11	1.64	0.54
Telomere	P36578	RPL4	7|22|24|27|10|20	110	18.33	6	29|11|8|11	0	0	0	0	0	-44.05	1.24	0.55
Telomere	P36776	LONP1	16|9|13|12|10|10	70	11.67	6	12|0|0|2	0.74	0.86	0.74	0.86	0.74	-1.13	3.33	0.09
Telomere	P36871	PGM1	4|3|0|0|0|0	7	1.17	6	0|0|0|0	0.66	1	0.66	1	0.66	-1.37	11.67	0.15
Telomere	P36873	PPP1CC	3|1|1|1|0|1	7	1.17	6	1|0|0|1	0.27	0.81	0.27	0.81	0.27	-2.81	2.33	0.5
Telomere	P36915	GNL1	7|4|2|0|2|2	17	2.83	6	1|0|0|2	0.73	1	0.73	1	0.73	-3.71	3.78	0.1
Telomere	P36952	SERPINB5	2|0|0|0|0|0	2	0.33	6	0|0|0|0	0.32	0.96	0.32	0.96	0.32	-1.37	3.33	0.44
Telomere	P36954	POLR2I	2|0|0|0|0|0	2	0.33	6	0|0|0|0	0.32	0.96	0.32	0.96	0.32	-1.37	3.33	0.44
Telomere	P36957	DLST	3|6|6|7|1|2	25	4.17	6	3|0|0|0	0.92	0.94	0.92	0.94	0.92	-1.58	5.56	0.03
Telomere	P36959	GMPR	1|0|0|0|0|0	1	0.17	6	0|0|0|0	0	0	0	0	0	-1.37	1.67	0.55
Telomere	P37108	SRP14	2|2|1|1|1|3	10	1.67	6	2|0|0|2	0.27	0.44	0.27	0.44	0.27	-2.96	1.67	0.5
Telomere	P37198	NUP62	5|1|0|0|0|1	7	1.17	6	0|0|0|3	0.29	0.86	0.29	0.86	0.29	-3.95	1.56	0.5
Telomere	P37235	HPCAL1	1|1|1|1|1|1	6	1	6	0|0|0|1	0	0	0	0	0	-0.3	4	0.55
Telomere	P37802	TAGLN2	4|3|0|0|0|1	8	1.33	6	0|0|0|3	0.47	0.77	0.47	0.77	0.47	-3.95	1.78	0.27
Telomere	P37837	TALDO1	4|5|1|0|0|3	13	2.17	6	0|0|0|0	1	1	1	1	1	-1.37	21.67	0
Telomere	P38117	ETFB	2|8|4|6|3|4	27	4.5	6	7|1|1|2	0.18	0.42	0.18	0.42	0.18	-7.46	1.64	0.52
Telomere	P38159	RBMX	2|9|5|8|2|12	38	6.33	6	1|0|0|3	0.98	1	0.98	1	0.98	-1.28	6.33	0.01
Telomere	P38432	COIL	4|4|1|0|2|3	14	2.33	6	1|0|0|1	0.9	0.95	0.9	0.95	0.9	-2.81	4.67	0.03
Telomere	P38606	ATP6V1A	11|2|2|3|0|2	20	3.33	6	2|0|0|3	0.46	0.99	0.46	0.99	0.46	-5.38	2.67	0.27
Telomere	P38646	HSPA9	19|26|26|25|16|30	142	23.67	6	24|5|6|12	0	0	0	0	0	-18.69	2.01	0.55
Telomere	P38919	EIF4A3	14|17|3|7|2|7	50	8.33	6	4|0|0|6	0.76	0.97	0.76	0.97	0.76	-6.43	3.33	0.09
Telomere	P39019	RPS19	1|6|2|1|0|8	18	3	6	1|1|0|0	0.84	1	0.84	1	0.84	-2.81	6	0.06
Telomere	P39023	RPL3	20|14|12|18|5|14	83	13.83	6	14|0|1|6	0.5	0.76	0.5	0.76	0.5	-11.29	2.63	0.26
Telomere	P39060	COL18A1	1|0|0|0|0|0	1	0.17	6	0|0|0|0	0	0	0	0	0	-1.37	1.67	0.55
Telomere	P39656	DDOST	8|1|3|7|5|3	27	4.5	6	3|0|0|1	0.9	0.97	0.9	0.97	0.9	-2.76	4.5	0.04
Telomere	P39687	ANP32A	1|12|1|1|0|3	18	3	6	0|0|0|1	0.65	1	0.65	1	0.65	-1.91	12	0.19
Telomere	P39748	FEN1	3|9|5|4|3|6	30	5	6	4|1|0|3	0.57	0.93	0.57	0.93	0.57	-3.47	2.5	0.24
Telomere	P40121	CAPG	5|5|1|0|2|1	14	2.33	6	0|0|0|2	0.82	0.94	0.82	0.94	0.82	-2.91	4.67	0.06
Telomere	P40222	TXLNA	7|0|0|0|0|2	9	1.5	6	0|0|0|1	0.6	1	0.6	1	0.6	-1.91	6	0.22
Telomere	P40227	CCT6A	16|15|13|10|2|13	69	11.5	6	8|0|0|16	0.06	0.11	0.06	0.11	0.06	-19.34	1.92	0.54
Telomere	P40429	RPL13A	4|8|6|8|2|8	36	6	6	6|4|3|3	0.03	0.03	0.03	0.03	0.03	-12.37	1.5	0.54
Telomere	P40616	ARL1	1|0|0|0|0|0	1	0.17	6	0|0|0|1	0	0	0	0	0	-1.91	0.67	0.55
Telomere	P40763	STAT3	8|3|0|1|0|1	13	2.17	6	0|0|0|1	0.65	1	0.65	1	0.65	-1.91	8.67	0.19
Telomere	P40818	USP8	6|0|0|0|0|0	6	1	6	0|0|0|1	0.33	1	0.33	1	0.33	-1.91	4	0.36
Telomere	P40925	MDH1	2|3|3|3|1|3	15	2.5	6	1|0|0|1	0.81	0.81	0.81	0.81	0.81	-1.2	5	0.06
Telomere	P40926	MDH2	5|16|10|12|13|21	77	12.83	6	9|5|6|8	0.33	0.96	0.33	0.96	0.33	-18.48	1.83	0.31
Telomere	P40937	RFC5	7|5|2|3|2|5	24	4	6	1|0|0|3	0.84	0.94	0.84	0.94	0.84	-1.28	4	0.06
Telomere	P40938	RFC3	4|4|0|0|0|0	8	1.33	6	0|0|0|0	0.67	1	0.67	1	0.67	-1.37	13.33	0.14
Telomere	P40939	HADHA	11|7|7|9|12|15	61	10.17	6	12|0|0|6	0.28	0.56	0.28	0.56	0.28	-5.96	2.26	0.5
Telomere	P41091	EIF2S3	5|3|2|2|5|3	20	3.33	6	1|0|0|2	0.85	0.96	0.85	0.96	0.85	-0.7	4.44	0.05
Telomere	P41214	EIF2D	3|0|0|0|0|0	3	0.5	6	0|0|0|1	0.32	0.95	0.32	0.95	0.32	-1.91	2	0.48
Telomere	P41223	BUD31	1|4|1|0|0|1	7	1.17	6	0|0|0|1	0.33	0.99	0.33	0.99	0.33	-1.91	4.67	0.43
Telomere	P41227	NAA10	1|1|0|0|0|0	2	0.33	6	0|0|0|0	0	0	0	0	0	-1.37	3.33	0.55
Telomere	P41240	CSK	6|1|0|1|0|0	8	1.33	6	0|0|0|3	0.3	0.91	0.3	0.91	0.3	-3.95	1.78	0.49
Telomere	P41250	GARS1	10|4|2|3|6|6	31	5.17	6	1|0|0|3	0.92	0.99	0.92	0.99	0.92	-1.28	5.17	0.03
Telomere	P41252	IARS1	29|9|9|8|4|10	69	11.5	6	11|0|0|25	0.09	0.28	0.09	0.28	0.09	-26.85	1.28	0.53
Telomere	P41743	PRKCI	4|0|0|0|0|0	4	0.67	6	0|0|0|0	0.33	1	0.33	1	0.33	-1.37	6.67	0.37
Telomere	P42126	ECI1	1|4|2|3|1|2	13	2.17	6	4|0|0|0	0.51	0.69	0.51	0.69	0.51	-2.41	2.17	0.26
Telomere	P42166	TMPO	18|12|4|4|2|6	46	7.67	6	4|0|0|6	0.69	0.98	0.69	0.98	0.69	-6.43	3.07	0.11
Telomere	P42167	TMPO	1|2|1|3|0|3	10	1.67	6	1|0|0|4	0.26	0.32	0.26	0.32	0.26	-5.18	1.33	0.51
Telomere	P42224	STAT1	9|1|1|0|0|0	11	1.83	6	0|0|0|3	0.33	0.98	0.33	0.98	0.33	-3.95	2.44	0.43
Telomere	P42285	MTREX	25|12|5|1|2|6	51	8.5	6	3|0|0|8	0.65	0.99	0.65	0.99	0.65	-8.98	3.09	0.19
Telomere	P42330	AKR1C3	0|1|0|0|0|0	1	0.17	6	0|0|0|0	0	0	0	0	0	-1.37	1.67	0.55
Telomere	P42338	PIK3CB	1|1|0|0|0|0	2	0.33	6	0|0|0|0	0	0	0	0	0	-1.37	3.33	0.55
Telomere	P42345	MTOR	19|1|1|0|0|0	21	3.5	6	0|0|0|3	0.33	1	0.33	1	0.33	-3.95	4.67	0.36
Telomere	P42356	PI4KA	5|0|0|0|0|0	5	0.83	6	0|0|0|1	0.33	1	0.33	1	0.33	-1.91	3.33	0.39
Telomere	P42566	EPS15	10|1|1|1|0|0	13	2.17	6	0|0|0|8	0.28	0.85	0.28	0.85	0.28	-7.66	1.08	0.5
Telomere	P42677	RPS27	0|2|1|1|1|3	8	1.33	6	1|1|0|2	0.21	0.44	0.21	0.44	0.21	-4.4	1.33	0.52
Telomere	P42684	ABL2	1|0|0|0|0|0	1	0.17	6	0|0|0|1	0	0	0	0	0	-1.91	0.67	0.55
Telomere	P42694	HELZ	3|0|0|0|0|0	3	0.5	6	0|0|0|0	0.33	0.99	0.33	0.99	0.33	-1.37	5	0.4
Telomere	P42695	NCAPD3	6|0|0|0|0|0	6	1	6	0|0|0|0	0.33	1	0.33	1	0.33	-1.37	10	0.34
Telomere	P42696	RBM34	0|1|0|0|0|0	1	0.17	6	0|0|0|1	0	0	0	0	0	-1.91	0.67	0.55
Telomere	P42704	LRPPRC	49|29|46|43|34|44	245	40.83	6	52|6|7|25	0	0	0	0	0	-37.36	1.81	0.55
Telomere	P42766	RPL35	2|4|3|3|1|4	17	2.83	6	2|2|1|0	0.46	0.56	0.46	0.56	0.46	-3.9	2.27	0.27
Telomere	P43034	PAFAH1B1	5|2|1|1|0|2	11	1.83	6	1|0|0|1	0.68	0.99	0.68	0.99	0.68	-2.81	3.67	0.11
Telomere	P43243	MATR3	18|14|4|7|9|13	65	10.83	6	3|0|0|4	0.99	1	0.99	1	0.99	-1.26	6.19	0
Telomere	P43246	MSH2	12|6|1|1|0|0	20	3.33	6	0|0|0|3	0.63	0.99	0.63	0.99	0.63	-3.95	4.44	0.21
Telomere	P43304	GPD2	13|3|7|5|4|11	43	7.17	6	5|0|0|7	0.57	0.85	0.57	0.85	0.57	-6.53	2.39	0.23
Telomere	P43307	SSR1	0|0|0|0|0|2	2	0.33	6	0|0|0|0	0.32	0.96	0.32	0.96	0.32	-1.37	3.33	0.44
Telomere	P43357	MAGEA3	1|0|0|0|1|0	2	0.33	6	0|0|0|0	0	0	0	0	0	-1.37	3.33	0.55
Telomere	P43487	RANBP1	3|4|2|3|1|5	18	3	6	2|0|0|4	0.37	0.58	0.37	0.58	0.37	-4.59	2	0.3
Telomere	P43490	NAMPT	3|5|2|2|1|2	15	2.5	6	0|0|0|4	0.53	0.77	0.53	0.77	0.53	-2.41	2.5	0.25
Telomere	P43686	PSMC4	7|10|2|2|0|1	22	3.67	6	2|0|0|2	0.72	1	0.72	1	0.72	-4.37	3.67	0.1
Telomere	P43897	TSFM	1|3|2|3|4|5	18	3	6	3|0|1|1	0.54	0.8	0.54	0.8	0.54	-3.89	2.4	0.25
Telomere	P45880	VDAC2	2|5|6|7|3|6	29	4.83	6	5|0|0|6	0.16	0.25	0.16	0.25	0.16	-7.37	1.76	0.53
Telomere	P45973	CBX5	0|4|0|0|0|3	7	1.17	6	0|0|0|0	0.66	1	0.66	1	0.66	-1.37	11.67	0.15
Telomere	P45974	USP5	22|15|4|5|2|7	55	9.17	6	2|0|0|9	0.72	0.97	0.72	0.97	0.72	-7.14	3.33	0.1
Telomere	P45983	MAPK8	3|1|0|0|0|0	4	0.67	6	0|0|0|0	0.33	0.99	0.33	0.99	0.33	-1.37	6.67	0.4
Telomere	P45984	MAPK9	1|1|0|0|0|0	2	0.33	6	0|0|0|0	0	0	0	0	0	-1.37	3.33	0.55
Telomere	P45985	MAP2K4	1|0|0|0|0|1	2	0.33	6	0|0|0|0	0	0	0	0	0	-1.37	3.33	0.55
Telomere	P46013	MKI67	68|18|11|11|7|22	137	22.83	6	12|0|0|32	0.32	0.97	0.32	0.97	0.32	-28.7	2.08	0.44
Telomere	P46020	PHKA1	1|0|0|0|0|0	1	0.17	6	0|0|0|0	0	0	0	0	0	-1.37	1.67	0.55
Telomere	P46060	RANGAP1	23|3|2|2|1|8	39	6.5	6	3|0|0|25	0.15	0.45	0.15	0.45	0.15	-25.74	0.93	0.53
Telomere	P46063	RECQL	5|8|0|0|0|0	13	2.17	6	0|0|0|2	0.65	0.99	0.65	0.99	0.65	-2.91	4.33	0.19
Telomere	P46087	NOP2	11|7|6|6|3|6	39	6.5	6	6|1|0|6	0.25	0.65	0.25	0.65	0.25	-7.6	2	0.52
Telomere	P46100	ATRX	6|1|0|1|1|0	9	1.5	6	0|0|0|0	0.33	1	0.33	1	0.33	-1.37	15	0.34
Telomere	P46109	CRKL	3|4|1|0|0|1	9	1.5	6	0|0|0|2	0.55	0.88	0.55	0.88	0.55	-2.91	3	0.24
Telomere	P46199	MTIF2	1|0|3|2|0|1	7	1.17	6	2|0|0|0	0.45	0.77	0.45	0.77	0.45	-2.91	2.33	0.28
Telomere	P46379	BAG6	9|7|1|4|2|5	28	4.67	6	0|0|0|4	0.87	0.94	0.87	0.94	0.87	-2.41	4.67	0.05
Telomere	P46459	NSF	12|2|0|1|2|4	21	3.5	6	2|0|0|3	0.54	1	0.54	1	0.54	-5.38	2.8	0.24
Telomere	P46734	MAP2K3	3|4|0|0|1|1	9	1.5	6	0|0|0|0	0.66	1	0.66	1	0.66	-1.37	15	0.15
Telomere	P46736	BRCC3	1|0|0|0|0|0	1	0.17	6	0|0|0|0	0	0	0	0	0	-1.37	1.67	0.55
Telomere	P46776	RPL27A	1|6|6|8|1|3	25	4.17	6	6|8|5|3	0	0	0	0	0	-20.8	0.76	0.55
Telomere	P46777	RPL5	11|9|4|7|3|8	42	7	6	1|0|0|1	1	1	1	1	1	1.47	14	0
Telomere	P46778	RPL21	3|3|6|6|3|6	27	4.5	6	2|1|0|1	0.96	0.96	0.96	0.96	0.96	-0.23	4.5	0.01
Telomere	P46779	RPL28	1|2|4|5|0|2	14	2.33	6	4|3|0|0	0.22	0.43	0.22	0.43	0.22	-7.52	1.33	0.52
Telomere	P46781	RPS9	6|10|14|15|6|11	62	10.33	6	16|10|7|11	0	0	0	0	0	-31.97	0.94	0.55
Telomere	P46782	RPS5	0|4|2|2|2|5	15	2.5	6	0|0|0|2	0.8	0.94	0.8	0.94	0.8	-2.91	5	0.07
Telomere	P46783	RPS10	1|3|1|2|2|5	14	2.33	6	2|1|0|1	0.5	0.89	0.5	0.89	0.5	-3	2.33	0.26
Telomere	P46821	MAP1B	1|0|0|0|0|0	1	0.17	6	0|0|0|0	0	0	0	0	0	-1.37	1.67	0.55
Telomere	P46926	GNPDA1	2|3|0|0|0|0	5	0.83	6	0|0|0|1	0.58	0.95	0.58	0.95	0.58	-1.91	3.33	0.23
Telomere	P46934	NEDD4	2|0|0|0|0|0	2	0.33	6	0|0|0|0	0.32	0.96	0.32	0.96	0.32	-1.37	3.33	0.44
Telomere	P46937	YAP1	1|2|0|0|0|1	4	0.67	6	0|0|0|0	0.32	0.96	0.32	0.96	0.32	-1.37	6.67	0.44
Telomere	P46939	UTRN	11|0|0|0|0|0	11	1.83	6	0|0|0|1	0.33	1	0.33	1	0.33	-1.91	7.33	0.32
Telomere	P46940	IQGAP1	48|8|13|14|11|20	114	19	6	8|0|0|33	0.31	0.92	0.31	0.92	0.31	-24.12	1.85	0.49
Telomere	P46977	STT3A	2|3|2|1|2|1	11	1.83	6	2|0|0|2	0.27	0.44	0.27	0.44	0.27	-2.96	1.83	0.5
Telomere	P47712	PLA2G4A	4|0|0|0|0|0	4	0.67	6	0|0|0|0	0.33	1	0.33	1	0.33	-1.37	6.67	0.37
Telomere	P47755	CAPZA2	4|2|3|2|1|3	15	2.5	6	0|0|0|1	0.96	0.99	0.96	0.99	0.96	-0.3	10	0.01
Telomere	P47756	CAPZB	9|2|1|0|0|5	17	2.83	6	1|0|0|4	0.59	0.94	0.59	0.94	0.59	-5.18	2.27	0.23
Telomere	P47895	ALDH1A3	11|4|4|2|2|3	26	4.33	6	2|0|0|7	0.34	0.85	0.34	0.85	0.34	-5.34	1.93	0.31
Telomere	P47897	QARS1	16|5|2|3|2|8	36	6	6	2|0|0|8	0.54	0.93	0.54	0.93	0.54	-6.23	2.4	0.25
Telomere	P47914	RPL29	0|3|5|5|1|2	16	2.67	6	0|0|0|0	1	1	1	1	1	-1.37	26.67	0
Telomere	P48047	ATP5PO	0|4|3|4|2|5	18	3	6	4|2|1|0	0.28	0.43	0.28	0.43	0.28	-7.61	1.71	0.5
Telomere	P48059	LIMS1	1|1|0|1|0|0	3	0.5	6	1|0|0|1	0	0	0	0	0	-2.81	1	0.55
Telomere	P48147	PREP	3|4|4|3|2|1	17	2.83	6	2|0|0|1	0.78	0.86	0.78	0.86	0.78	-2.11	3.78	0.08
Telomere	P48163	ME1	7|2|1|1|0|0	11	1.83	6	1|0|0|1	0.51	1	0.51	1	0.51	-2.81	3.67	0.26
Telomere	P48444	ARCN1	14|2|3|0|0|0	19	3.17	6	4|0|0|7	0.3	0.9	0.3	0.9	0.3	-11.48	1.15	0.49
Telomere	P48449	LSS	1|0|0|0|0|0	1	0.17	6	0|0|0|0	0	0	0	0	0	-1.37	1.67	0.55
Telomere	P48506	GCLC	4|1|1|1|0|0	7	1.17	6	1|0|0|1	0.32	0.95	0.32	0.95	0.32	-2.81	2.33	0.49
Telomere	P48507	GCLM	3|2|0|1|1|1	8	1.33	6	0|0|0|1	0.58	0.95	0.58	0.95	0.58	-1.91	5.33	0.23
Telomere	P48509	CD151	0|0|1|0|1|0	2	0.33	6	0|0|0|0	0	0	0	0	0	-1.37	3.33	0.55
Telomere	P48556	PSMD8	3|4|1|0|1|0	9	1.5	6	0|0|0|0	0.66	1	0.66	1	0.66	-1.37	15	0.15
Telomere	P48634	PRRC2A	3|0|0|0|0|1	4	0.67	6	0|0|0|0	0.33	0.99	0.33	0.99	0.33	-1.37	6.67	0.4
Telomere	P48637	GSS	0|3|1|0|0|0	4	0.67	6	0|0|0|1	0.32	0.95	0.32	0.95	0.32	-1.91	2.67	0.48
Telomere	P48643	CCT5	30|9|4|6|5|20	74	12.33	6	6|0|0|18	0.48	0.92	0.48	0.92	0.48	-15.29	2.06	0.27
Telomere	P48723	HSPA13	0|0|1|0|0|0	1	0.17	6	0|0|0|0	0	0	0	0	0	-1.37	1.67	0.55
Telomere	P48729	CSNK1A1	5|3|2|1|1|0	12	2	6	2|0|0|1	0.64	0.96	0.64	0.96	0.64	-3.71	2.67	0.2
Telomere	P48730	CSNK1D	3|1|1|0|0|0	5	0.83	6	0|0|0|0	0.33	0.99	0.33	0.99	0.33	-1.37	8.33	0.4
Telomere	P48735	IDH2	4|4|3|5|2|2	20	3.33	6	5|1|1|0	0.3	0.43	0.3	0.43	0.3	-3.74	1.9	0.5
Telomere	P48739	PITPNB	4|1|1|0|0|2	8	1.33	6	0|0|0|1	0.59	0.99	0.59	0.99	0.59	-1.91	5.33	0.22
Telomere	P49005	POLD2	2|3|0|0|1|1	7	1.17	6	0|0|0|0	0.65	0.99	0.65	0.99	0.65	-1.37	11.67	0.18
Telomere	P49006	MARCKSL1	0|0|0|0|0|2	2	0.33	6	0|0|0|0	0.32	0.96	0.32	0.96	0.32	-1.37	3.33	0.44
Telomere	P49023	PXN	9|2|1|1|1|4	18	3	6	0|0|0|3	0.73	0.98	0.73	0.98	0.73	-1.58	4	0.1
Telomere	P49116	NR2C2	0|1|0|0|0|0	1	0.17	6	0|0|0|0	0	0	0	0	0	-1.37	1.67	0.55
Telomere	P49189	ALDH9A1	3|0|1|0|1|0	5	0.83	6	0|0|0|0	0.33	0.99	0.33	0.99	0.33	-1.37	8.33	0.4
Telomere	P49207	RPL34	2|2|10|6|2|3	25	4.17	6	7|3|1|1	0.23	0.64	0.23	0.64	0.23	-8.2	1.39	0.52
Telomere	P49247	RPIA	0|1|0|1|0|0	2	0.33	6	0|0|0|0	0	0	0	0	0	-1.37	3.33	0.55
Telomere	P49257	LMAN1	1|2|1|0|0|2	6	1	6	0|0|0|1	0.53	0.79	0.53	0.79	0.53	-1.91	4	0.25
Telomere	P49321	NASP	11|11|2|3|3|9	39	6.5	6	1|0|0|1	1	1	1	1	1	0.13	13	0
Telomere	P49327	FASN	109|43|37|42|37|57	325	54.17	6	37|5|7|74	0.01	0.04	0.01	0.04	0.01	-54.4	1.76	0.54
Telomere	P49336	CDK8	1|1|0|0|0|0	2	0.33	6	0|0|0|0	0	0	0	0	0	-1.37	3.33	0.55
Telomere	P49354	FNTA	1|0|0|0|0|0	1	0.17	6	0|0|0|0	0	0	0	0	0	-1.37	1.67	0.55
Telomere	P49366	DHPS	0|1|0|0|0|0	1	0.17	6	0|0|0|0	0	0	0	0	0	-1.37	1.67	0.55
Telomere	P49368	CCT3	33|18|7|9|13|19	99	16.5	6	14|3|3|23	0.04	0.12	0.04	0.12	0.04	-28.25	1.53	0.54
Telomere	P49406	MRPL19	1|2|2|1|1|1	8	1.33	6	1|0|0|1	0.35	0.53	0.35	0.53	0.35	-1.2	2.67	0.31
Telomere	P49407	ARRB1	1|0|0|0|0|0	1	0.17	6	0|0|0|0	0	0	0	0	0	-1.37	1.67	0.55
Telomere	P49411	TUFM	13|17|15|19|15|24	103	17.17	6	19|7|6|6	0	0.01	0	0.01	0	-15.21	1.81	0.54
Telomere	P49419	ALDH7A1	7|3|2|2|3|5	22	3.67	6	2|0|0|1	0.86	1	0.86	1	0.86	-0.7	4.89	0.05
Telomere	P49441	INPP1	3|0|0|0|0|0	3	0.5	6	0|0|0|0	0.33	0.99	0.33	0.99	0.33	-1.37	5	0.4
Telomere	P49454	CENPF	23|0|0|0|0|0	23	3.83	6	0|0|0|0	0.33	1	0.33	1	0.33	-1.37	38.33	0.31
Telomere	P49585	PCYT1A	1|3|0|0|0|0	4	0.67	6	0|0|0|0	0.33	0.99	0.33	0.99	0.33	-1.37	6.67	0.4
Telomere	P49588	AARS1	20|2|4|3|4|3	36	6	6	2|0|0|6	0.43	0.99	0.43	0.99	0.43	-4.49	3	0.29
Telomere	P49589	CARS1	11|1|2|2|3|1	20	3.33	6	1|0|0|3	0.56	0.99	0.56	0.99	0.56	-2.76	3.33	0.24
Telomere	P49590	HARS2	2|0|1|2|1|1	7	1.17	6	2|0|0|0	0.38	0.57	0.38	0.57	0.38	-2.91	2.33	0.3
Telomere	P49591	SARS1	8|3|3|4|2|2	22	3.67	6	4|0|0|8	0.1	0.29	0.1	0.29	0.1	-7.89	1.22	0.53
Telomere	P49642	PRIM1	1|1|0|1|0|0	3	0.5	6	0|0|0|0	0	0	0	0	0	-1.37	5	0.55
Telomere	P49643	PRIM2	8|1|2|1|1|1	14	2.33	6	0|0|0|2	0.52	0.99	0.52	0.99	0.52	-0.86	4.67	0.25
Telomere	P49711	CTCF	4|0|0|0|0|0	4	0.67	6	0|0|0|0	0.33	1	0.33	1	0.33	-1.37	6.67	0.37
Telomere	P49720	PSMB3	3|6|0|4|2|2	17	2.83	6	0|0|0|3	0.78	0.91	0.78	0.91	0.78	-3.95	3.78	0.08
Telomere	P49721	PSMB2	5|3|0|0|0|2	10	1.67	6	0|0|0|0	0.98	1	0.98	1	0.98	-1.37	16.67	0.01
Telomere	P49736	MCM2	38|22|9|10|6|8	93	15.5	6	3|0|0|4	0.98	1	0.98	1	0.98	0.49	8.86	0.01
Telomere	P49748	ACADVL	1|9|4|3|4|5	26	4.33	6	4|0|1|2	0.53	0.95	0.53	0.95	0.53	-5.64	2.48	0.25
Telomere	P49750	YLPM1	17|6|1|2|1|1	28	4.67	6	0|0|0|0	0.99	1	0.99	1	0.99	1.14	46.67	0
Telomere	P49754	VPS41	4|0|0|0|0|0	4	0.67	6	0|0|0|0	0.33	1	0.33	1	0.33	-1.37	6.67	0.37
Telomere	P49755	TMED10	3|1|1|1|1|2	9	1.5	6	0|0|0|1	0.58	0.95	0.58	0.95	0.58	-0.3	6	0.23
Telomere	P49756	RBM25	9|16|3|4|1|3	36	6	6	2|0|0|0	0.96	1	0.96	1	0.96	-0.86	12	0.02
Telomere	P49759	CLK1	0|1|0|0|0|0	1	0.17	6	0|0|0|0	0	0	0	0	0	-1.37	1.67	0.55
Telomere	P49761	CLK3	1|0|0|0|1|0	2	0.33	6	0|0|0|0	0	0	0	0	0	-1.37	3.33	0.55
Telomere	P49770	EIF2B2	1|1|0|0|0|0	2	0.33	6	0|0|0|2	0	0	0	0	0	-2.91	0.67	0.55
Telomere	P49773	HINT1	0|4|1|1|0|2	8	1.33	6	0|0|0|2	0.49	0.88	0.49	0.88	0.49	-2.91	2.67	0.26
Telomere	P49790	NUP153	21|1|0|0|0|0	22	3.67	6	0|0|0|12	0.31	0.94	0.31	0.94	0.31	-11.77	1.22	0.49
Telomere	P49792	RANBP2	58|3|2|0|0|5	68	11.33	6	2|0|0|44	0.31	0.94	0.31	0.94	0.31	-48.82	0.99	0.49
Telomere	P49815	TSC2	5|0|0|0|0|0	5	0.83	6	0|0|0|1	0.33	1	0.33	1	0.33	-1.91	3.33	0.39
Telomere	P49821	NDUFV1	3|1|1|1|1|1	8	1.33	6	1|0|0|0	0.32	0.95	0.32	0.95	0.32	-0.3	5.33	0.48
Telomere	P49840	GSK3A	2|0|0|0|0|0	2	0.33	6	0|0|0|0	0.32	0.96	0.32	0.96	0.32	-1.37	3.33	0.44
Telomere	P49841	GSK3B	1|0|0|0|0|0	1	0.17	6	0|0|0|0	0	0	0	0	0	-1.37	1.67	0.55
Telomere	P49848	TAF6	5|3|1|0|0|0	9	1.5	6	0|0|0|0	0.66	1	0.66	1	0.66	-1.37	15	0.15
Telomere	P49902	NT5C2	8|0|0|0|0|0	8	1.33	6	1|1|0|1	0.33	1	0.33	1	0.33	-3.71	1.78	0.37
Telomere	P49903	SEPHS1	0|1|0|0|0|0	1	0.17	6	0|0|0|0	0	0	0	0	0	-1.37	1.67	0.55
Telomere	P49914	MTHFS	0|1|0|0|0|1	2	0.33	6	0|0|0|0	0	0	0	0	0	-1.37	3.33	0.55
Telomere	P49915	GMPS	16|14|7|3|4|11	55	9.17	6	4|0|0|3	0.98	1	0.98	1	0.98	-2.41	5.24	0.01
Telomere	P49916	LIG3	7|9|0|1|0|0	17	2.83	6	0|0|0|1	0.67	1	0.67	1	0.67	-1.91	11.33	0.13
Telomere	P49917	LIG4	1|0|0|0|0|0	1	0.17	6	0|0|0|0	0	0	0	0	0	-1.37	1.67	0.55
Telomere	P49959	MRE11	3|1|0|0|0|0	4	0.67	6	0|0|0|0	0.33	0.99	0.33	0.99	0.33	-1.37	6.67	0.4
Telomere	P50148	GNAQ	0|0|0|0|0|1	1	0.17	6	0|0|0|0	0	0	0	0	0	-1.37	1.67	0.55
Telomere	P50213	IDH3A	1|7|4|3|6|5	26	4.33	6	5|2|2|2	0.15	0.31	0.15	0.31	0.15	-9.49	1.58	0.53
Telomere	P50225	SULT1A1	0|1|0|0|0|0	1	0.17	6	0|0|0|0	0	0	0	0	0	-1.37	1.67	0.55
Telomere	P50238	CRIP1	0|2|0|0|0|0	2	0.33	6	0|0|0|0	0.32	0.96	0.32	0.96	0.32	-1.37	3.33	0.44
Telomere	P50395	GDI2	18|12|10|3|4|7	54	9	6	7|0|0|8	0.55	0.91	0.55	0.91	0.55	-9.26	2.4	0.24
Telomere	P50402	EMD	3|3|2|2|1|1	12	2	6	1|0|0|0	0.9	0.95	0.9	0.95	0.9	-0.3	8	0.03
Telomere	P50416	CPT1A	5|0|0|0|0|2	7	1.17	6	0|0|0|0	0.65	1	0.65	1	0.65	-1.37	11.67	0.17
Telomere	P50453	SERPINB9	1|3|0|0|0|0	4	0.67	6	0|0|0|0	0.33	0.99	0.33	0.99	0.33	-1.37	6.67	0.4
Telomere	P50454	SERPINH1	0|3|1|3|3|2	12	2	6	1|0|0|1	0.81	0.81	0.81	0.81	0.81	-2.81	4	0.06
Telomere	P50502	ST13	10|5|2|3|2|6	28	4.67	6	3|0|1|4	0.58	0.96	0.58	0.96	0.58	-4.92	2.33	0.23
Telomere	P50542	PEX5	2|0|0|0|0|0	2	0.33	6	0|0|0|0	0.32	0.96	0.32	0.96	0.32	-1.37	3.33	0.44
Telomere	P50552	VASP	1|0|0|0|0|1	2	0.33	6	0|0|0|0	0	0	0	0	0	-1.37	3.33	0.55
Telomere	P50570	DNM2	12|2|0|1|2|3	20	3.33	6	4|0|0|16	0.03	0.08	0.03	0.08	0.03	-20.55	0.67	0.54
Telomere	P50579	METAP2	2|0|0|0|1|3	6	1	6	0|0|0|1	0.58	0.95	0.58	0.95	0.58	-1.91	4	0.23
Telomere	P50613	CDK7	4|2|1|0|1|0	8	1.33	6	0|0|0|1	0.59	0.99	0.59	0.99	0.59	-1.91	5.33	0.22
Telomere	P50616	TOB1	0|1|0|0|0|0	1	0.17	6	0|0|0|0	0	0	0	0	0	-1.37	1.67	0.55
Telomere	P50747	HLCS	0|0|2|0|0|0	2	0.33	6	4|0|1|0	0.04	0.13	0.04	0.13	0.04	-5.18	0.27	0.54
Telomere	P50748	KNTC1	9|0|1|0|0|0	10	1.67	6	0|0|0|0	0.33	1	0.33	1	0.33	-1.37	16.67	0.32
Telomere	P50750	CDK9	2|6|1|2|0|0	11	1.83	6	1|0|0|0	0.86	1	0.86	1	0.86	-1.91	7.33	0.05
Telomere	P50851	LRBA	39|1|3|2|2|5	52	8.67	6	2|0|0|12	0.33	0.99	0.33	0.99	0.33	-11.58	2.48	0.39
Telomere	P50914	RPL14	1|5|2|3|4|3	18	3	6	2|2|2|2	0.14	0.28	0.14	0.28	0.14	-6.5	1.5	0.53
Telomere	P50990	CCT8	29|18|16|17|12|22	114	19	6	11|2|3|28	0	0.01	0	0.01	0	-21.09	1.73	0.54
Telomere	P50991	CCT4	28|10|8|5|4|17	72	12	6	8|0|2|18	0.28	0.82	0.28	0.82	0.28	-19.23	1.71	0.5
Telomere	P50995	ANXA11	7|12|6|8|4|5	42	7	6	3|0|0|2	0.96	1	0.96	1	0.96	0.1	5.6	0.02
Telomere	P51003	PAPOLA	6|5|0|0|0|0	11	1.83	6	0|0|0|0	0.67	1	0.67	1	0.67	-1.37	18.33	0.14
Telomere	P51114	FXR1	3|5|3|1|1|3	16	2.67	6	1|0|1|4	0.3	0.58	0.3	0.58	0.3	-4.66	1.78	0.5
Telomere	P51116	FXR2	1|0|0|0|0|0	1	0.17	6	0|0|0|0	0	0	0	0	0	-1.37	1.67	0.55
Telomere	P51148	RAB5C	2|1|1|2|1|2	9	1.5	6	0|0|0|2	0.57	0.57	0.57	0.57	0.57	-0.86	3	0.23
Telomere	P51149	RAB7A	7|5|4|5|4|7	32	5.33	6	2|0|0|9	0.21	0.28	0.21	0.28	0.21	-3.95	1.94	0.52
Telomere	P51153	RAB13	3|1|1|1|0|1	7	1.17	6	1|0|0|0	0.32	0.95	0.32	0.95	0.32	-1.91	4.67	0.48
Telomere	P51398	DAP3	4|3|1|4|3|1	16	2.67	6	5|0|1|0	0.34	0.41	0.34	0.41	0.34	-4.43	1.78	0.31
Telomere	P51452	DUSP3	2|0|0|0|0|0	2	0.33	6	0|0|0|1	0.26	0.79	0.26	0.79	0.26	-1.91	1.33	0.5
Telomere	P51531	SMARCA2	1|0|0|0|0|0	1	0.17	6	0|0|0|0	0	0	0	0	0	-1.37	1.67	0.55
Telomere	P51532	SMARCA4	18|11|2|2|2|4	39	6.5	6	1|0|0|3	0.89	1	0.89	1	0.89	-1.28	6.5	0.04
Telomere	P51553	IDH3G	0|2|2|1|0|1	6	1	6	1|0|1|0	0.35	0.53	0.35	0.53	0.35	-2.81	2	0.31
Telomere	P51570	GALK1	3|3|2|3|1|1	13	2.17	6	2|0|0|4	0.17	0.17	0.17	0.17	0.17	-4.59	1.44	0.53
Telomere	P51571	SSR4	0|2|1|0|1|1	5	0.83	6	0|0|0|0	0.32	0.96	0.32	0.96	0.32	-1.37	8.33	0.44
Telomere	P51572	BCAP31	3|0|0|0|0|3	6	1	6	0|0|0|0	0.66	0.99	0.66	0.99	0.66	-1.37	10	0.16
Telomere	P51580	TPMT	2|0|0|0|0|0	2	0.33	6	0|0|0|0	0.32	0.96	0.32	0.96	0.32	-1.37	3.33	0.44
Telomere	P51610	HCFC1	13|11|2|2|1|7	36	6	6	0|0|0|2	0.99	1	0.99	1	0.99	-0.86	12	0
Telomere	P51648	ALDH3A2	4|1|2|1|0|0	8	1.33	6	0|0|0|3	0.41	0.77	0.41	0.77	0.41	-3.95	1.78	0.29
Telomere	P51649	ALDH5A1	0|1|1|1|0|0	3	0.5	6	1|0|0|0	0	0	0	0	0	-1.91	2	0.55
Telomere	P51659	HSD17B4	27|3|0|2|0|3	35	5.83	6	4|0|0|14	0.31	0.94	0.31	0.94	0.31	-18.57	1.3	0.49
Telomere	P51665	PSMD7	6|1|1|1|2|3	14	2.33	6	0|0|0|0	0.98	1	0.98	1	0.98	1.14	23.33	0.01
Telomere	P51784	USP11	12|3|2|2|1|1	21	3.5	6	1|0|0|2	0.66	1	0.66	1	0.66	-2.11	4.67	0.17
Telomere	P51809	VAMP7	3|0|0|0|0|0	3	0.5	6	0|0|0|0	0.33	0.99	0.33	0.99	0.33	-1.37	5	0.4
Telomere	P51812	RPS6KA3	5|3|0|0|0|0	8	1.33	6	0|0|0|1	0.65	1	0.65	1	0.65	-1.91	5.33	0.19
Telomere	P51858	HDGF	2|2|0|0|1|2	7	1.17	6	0|0|0|0	0.96	0.96	0.96	0.96	0.96	-1.37	11.67	0.02
Telomere	P51946	CCNH	1|1|0|0|0|1	3	0.5	6	0|0|0|0	0	0	0	0	0	-1.37	5	0.55
Telomere	P51948	MNAT1	4|2|0|0|0|0	6	1	6	0|0|0|0	0.65	1	0.65	1	0.65	-1.37	10	0.17
Telomere	P51965	UBE2E1	0|1|0|0|0|0	1	0.17	6	0|0|0|0	0	0	0	0	0	-1.37	1.67	0.55
Telomere	P51991	HNRNPA3	3|7|6|4|5|11	36	6	6	2|0|0|0	0.99	1	0.99	1	0.99	1.2	12	0
Telomere	P52209	PGD	7|5|6|4|6|8	36	6	6	5|0|0|9	0.06	0.11	0.06	0.11	0.06	-6.67	1.71	0.54
Telomere	P52272	HNRNPM	36|14|9|9|4|27	99	16.5	6	7|0|0|6	0.95	1	0.95	1	0.95	-5.9	5.08	0.02
Telomere	P52292	KPNA2	15|8|4|3|5|15	50	8.33	6	3|1|0|9	0.65	0.88	0.65	0.88	0.65	-7.38	2.56	0.19
Telomere	P52294	KPNA1	5|1|0|0|1|0	7	1.17	6	0|0|0|1	0.33	1	0.33	1	0.33	-1.91	4.67	0.39
Telomere	P52298	NCBP2	1|2|0|1|1|0	5	0.83	6	0|0|0|0	0.32	0.96	0.32	0.96	0.32	-1.37	8.33	0.44
Telomere	P52306	RAP1GDS1	7|1|1|2|0|1	12	2	6	0|0|0|5	0.34	0.84	0.34	0.84	0.34	-4.94	1.6	0.31
Telomere	P52434	POLR2H	0|2|0|0|0|0	2	0.33	6	0|0|0|0	0.32	0.96	0.32	0.96	0.32	-1.37	3.33	0.44
Telomere	P52435	POLR2J	0|1|0|0|0|0	1	0.17	6	0|0|0|0	0	0	0	0	0	-1.37	1.67	0.55
Telomere	P52565	ARHGDIA	2|4|2|2|1|2	13	2.17	6	3|0|0|3	0.15	0.36	0.15	0.36	0.15	-4.66	1.44	0.53
Telomere	P52594	AGFG1	5|0|0|0|0|0	5	0.83	6	0|0|0|3	0.29	0.86	0.29	0.86	0.29	-3.95	1.11	0.5
Telomere	P52597	HNRNPF	11|18|9|11|12|12	73	12.17	6	4|1|1|6	0.94	1	0.94	1	0.94	0.06	4.06	0.02
Telomere	P52630	STAT2	2|0|0|0|0|0	2	0.33	6	0|0|0|0	0.32	0.96	0.32	0.96	0.32	-1.37	3.33	0.44
Telomere	P52701	MSH6	22|11|3|3|2|3	44	7.33	6	1|0|0|4	0.77	1	0.77	1	0.77	-1.93	5.87	0.08
Telomere	P52732	KIF11	13|0|0|0|0|0	13	2.17	6	0|0|0|1	0.33	1	0.33	1	0.33	-1.91	8.67	0.32
Telomere	P52735	VAV2	4|1|1|0|0|0	6	1	6	0|0|0|1	0.33	0.99	0.33	0.99	0.33	-1.91	4	0.43
Telomere	P52756	RBM5	3|4|2|3|0|0	12	2	6	0|0|0|0	1	1	1	1	1	-1.37	20	0
Telomere	P52788	SMS	3|3|0|0|0|2	8	1.33	6	0|0|0|1	0.9	0.95	0.9	0.95	0.9	-1.91	5.33	0.03
Telomere	P52789	HK2	4|0|0|0|0|0	4	0.67	6	0|0|0|0	0.33	1	0.33	1	0.33	-1.37	6.67	0.37
Telomere	P52815	MRPL12	0|4|1|1|1|0	7	1.17	6	2|0|0|1	0.29	0.86	0.29	0.86	0.29	-3.71	1.56	0.5
Telomere	P52888	THOP1	1|5|0|0|0|0	6	1	6	0|0|0|1	0.33	1	0.33	1	0.33	-1.91	4	0.39
Telomere	P52907	CAPZA1	8|6|2|2|3|4	25	4.17	6	3|1|0|5	0.36	0.71	0.36	0.71	0.36	-5.71	1.85	0.3
Telomere	P52943	CRIP2	2|2|1|1|0|0	6	1	6	1|0|0|2	0.22	0.33	0.22	0.33	0.22	-3.71	1.33	0.52
Telomere	P52948	NUP98	26|2|1|1|0|1	31	5.17	6	2|0|0|31	0.1	0.3	0.1	0.3	0.1	-34.53	0.63	0.53
Telomere	P53004	BLVRA	2|0|0|0|0|0	2	0.33	6	0|0|0|0	0.32	0.96	0.32	0.96	0.32	-1.37	3.33	0.44
Telomere	P53007	SLC25A1	1|0|0|1|1|1	4	0.67	6	1|0|0|0	0	0	0	0	0	-1.91	2.67	0.55
Telomere	P53041	PPP5C	1|1|1|1|1|2	7	1.17	6	0|0|0|4	0.1	0.3	0.1	0.3	0.1	-2.41	1.17	0.53
Telomere	P53350	PLK1	5|0|0|0|0|1	6	1	6	0|0|0|0	0.33	1	0.33	1	0.33	-1.37	10	0.35
Telomere	P53365	ARFIP2	1|1|0|0|0|0	2	0.33	6	0|0|0|0	0	0	0	0	0	-1.37	3.33	0.55
Telomere	P53367	ARFIP1	1|1|0|1|0|0	3	0.5	6	0|0|0|1	0	0	0	0	0	-1.91	2	0.55
Telomere	P53396	ACLY	41|19|10|8|10|20	108	18	6	10|0|0|21	0.33	0.94	0.33	0.94	0.33	-15.44	2.32	0.39
Telomere	P53582	METAP1	3|1|0|0|0|1	5	0.83	6	1|0|0|2	0.21	0.64	0.21	0.64	0.21	-3.71	1.11	0.52
Telomere	P53597	SUCLG1	0|2|1|1|2|2	8	1.33	6	3|0|0|0	0.44	0.44	0.44	0.44	0.44	-3.95	1.78	0.28
Telomere	P53611	RABGGTB	1|1|2|0|0|0	4	0.67	6	0|0|0|1	0.26	0.79	0.26	0.79	0.26	-1.91	2.67	0.5
Telomere	P53618	COPB1	28|8|5|5|3|6	55	9.17	6	7|0|0|17	0.3	0.9	0.3	0.9	0.3	-17.17	1.53	0.49
Telomere	P53621	COPA	33|13|7|11|8|14	86	14.33	6	12|0|0|28	0.1	0.3	0.1	0.3	0.1	-24.98	1.43	0.53
Telomere	P53677	AP3M2	1|0|0|0|0|0	1	0.17	6	0|0|0|0	0	0	0	0	0	-1.37	1.67	0.55
Telomere	P53680	AP2S1	4|0|0|1|0|0	5	0.83	6	0|0|0|0	0.33	1	0.33	1	0.33	-1.37	8.33	0.37
Telomere	P53803	POLR2K	0|1|0|0|0|0	1	0.17	6	0|0|0|0	0	0	0	0	0	-1.37	1.67	0.55
Telomere	P53814	SMTN	4|1|0|0|0|0	5	0.83	6	0|0|0|0	0.33	1	0.33	1	0.33	-1.37	8.33	0.37
Telomere	P53985	SLC16A1	0|0|0|0|0|1	1	0.17	6	0|0|0|0	0	0	0	0	0	-1.37	1.67	0.55
Telomere	P53990	IST1	3|1|0|0|0|0	4	0.67	6	0|0|0|0	0.33	0.99	0.33	0.99	0.33	-1.37	6.67	0.4
Telomere	P53992	SEC24C	7|0|0|0|0|1	8	1.33	6	0|0|0|6	0.27	0.8	0.27	0.8	0.27	-6.07	0.89	0.5
Telomere	P53999	SUB1	1|4|1|2|1|4	13	2.17	6	0|0|0|0	0.99	1	0.99	1	0.99	1.14	21.67	0
Telomere	P54105	CLNS1A	0|2|0|0|0|0	2	0.33	6	0|0|0|0	0.32	0.96	0.32	0.96	0.32	-1.37	3.33	0.44
Telomere	P54132	BLM	4|0|0|0|0|0	4	0.67	6	0|0|0|0	0.33	1	0.33	1	0.33	-1.37	6.67	0.37
Telomere	P54136	RARS1	16|2|6|6|2|12	44	7.33	6	4|0|0|14	0.29	0.67	0.29	0.67	0.29	-13.43	1.63	0.5
Telomere	P54274	TERF1	3|3|2|0|1|1	10	1.67	6	0|0|0|0	0.98	0.99	0.98	0.99	0.98	-1.37	16.67	0.01
Telomere	P54577	YARS1	10|12|5|5|3|4	39	6.5	6	6|0|1|12	0.05	0.11	0.05	0.11	0.05	-12.79	1.37	0.54
Telomere	P54578	USP14	6|3|2|2|0|1	14	2.33	6	0|0|0|5	0.45	0.79	0.45	0.79	0.45	-4.94	1.87	0.27
Telomere	P54619	PRKAG1	3|0|0|0|0|0	3	0.5	6	0|0|0|1	0.32	0.95	0.32	0.95	0.32	-1.91	2	0.48
Telomere	P54709	ATP1B3	2|2|0|0|1|2	7	1.17	6	0|0|0|0	0.96	0.96	0.96	0.96	0.96	-1.37	11.67	0.02
Telomere	P54727	RAD23B	1|6|3|2|1|2	15	2.5	6	0|0|0|0	0.98	1	0.98	1	0.98	1.14	25	0.01
Telomere	P54819	AK2	2|0|1|3|0|2	8	1.33	6	2|0|0|0	0.64	0.77	0.64	0.77	0.64	-2.91	2.67	0.21
Telomere	P54868	HMGCS2	1|0|0|0|0|0	1	0.17	6	0|0|0|0	0	0	0	0	0	-1.37	1.67	0.55
Telomere	P54886	ALDH18A1	15|6|6|6|5|10	48	8	6	6|0|0|15	0.08	0.24	0.08	0.24	0.08	-11.19	1.52	0.53
Telomere	P54920	NAPA	1|1|0|1|0|0	3	0.5	6	0|0|0|0	0	0	0	0	0	-1.37	5	0.55
Telomere	P55010	EIF5	2|2|3|2|1|5	15	2.5	6	1|0|1|3	0.38	0.8	0.38	0.8	0.38	-3.89	2	0.3
Telomere	P55011	SLC12A2	1|0|0|0|0|1	2	0.33	6	0|0|0|2	0	0	0	0	0	-2.91	0.67	0.55
Telomere	P55036	PSMD4	7|6|3|3|1|5	25	4.17	6	0|0|0|1	1	1	1	1	1	-0.3	16.67	0
Telomere	P55039	DRG2	1|0|0|0|0|0	1	0.17	6	0|0|0|0	0	0	0	0	0	-1.37	1.67	0.55
Telomere	P55060	CSE1L	24|17|7|7|5|12	72	12	6	7|0|0|16	0.38	0.84	0.38	0.84	0.38	-13.03	2.09	0.3
Telomere	P55072	VCP	38|45|21|25|16|22	167	27.83	6	11|0|1|29	0.51	0.9	0.51	0.9	0.51	-13.43	2.72	0.26
Telomere	P55081	MFAP1	1|1|0|0|0|0	2	0.33	6	0|0|0|0	0	0	0	0	0	-1.37	3.33	0.55
Telomere	P55084	HADHB	4|6|3|5|3|7	28	4.67	6	3|0|0|1	0.87	0.94	0.87	0.94	0.87	-0.16	4.67	0.04
Telomere	P55196	AFDN	4|0|1|0|0|0	5	0.83	6	0|0|0|0	0.33	1	0.33	1	0.33	-1.37	8.33	0.37
Telomere	P55199	ELL	0|1|0|0|0|0	1	0.17	6	0|0|0|0	0	0	0	0	0	-1.37	1.67	0.55
Telomere	P55209	NAP1L1	5|5|3|3|3|4	23	3.83	6	3|0|1|2	0.59	0.7	0.59	0.7	0.59	-1.93	2.56	0.23
Telomere	P55210	CASP7	1|1|0|0|0|0	2	0.33	6	0|0|0|0	0	0	0	0	0	-1.37	3.33	0.55
Telomere	P55211	CASP9	2|0|0|0|0|0	2	0.33	6	0|0|0|0	0.32	0.96	0.32	0.96	0.32	-1.37	3.33	0.44
Telomere	P55212	CASP6	1|0|0|0|0|0	1	0.17	6	0|0|0|0	0	0	0	0	0	-1.37	1.67	0.55
Telomere	P55263	ADK	2|2|0|0|0|1	5	0.83	6	0|0|0|0	0.64	0.96	0.64	0.96	0.64	-1.37	8.33	0.2
Telomere	P55265	ADAR	16|15|5|6|2|6	50	8.33	6	3|0|0|9	0.62	0.9	0.62	0.9	0.62	-7.79	2.78	0.21
Telomere	P55327	TPD52	0|2|0|0|0|1	3	0.5	6	0|0|0|0	0.32	0.96	0.32	0.96	0.32	-1.37	5	0.44
Telomere	P55735	SEC13	3|0|0|0|0|0	3	0.5	6	0|0|0|1	0.32	0.95	0.32	0.95	0.32	-1.91	2	0.48
Telomere	P55769	SNU13	1|3|0|0|0|0	4	0.67	6	0|0|0|2	0.26	0.77	0.26	0.77	0.26	-2.91	1.33	0.51
Telomere	P55786	NPEPPS	20|15|3|3|0|1	42	7	6	2|0|0|8	0.63	0.97	0.63	0.97	0.63	-10.19	2.8	0.21
Telomere	P55795	HNRNPH2	0|4|1|2|1|1	9	1.5	6	0|0|0|1	0.59	0.99	0.59	0.99	0.59	-1.91	6	0.22
Telomere	P55809	OXCT1	0|3|3|2|3|2	13	2.17	6	2|0|0|1	0.64	0.64	0.64	0.64	0.64	-3.71	2.89	0.21
Telomere	P55884	EIF3B	23|7|2|6|6|12	56	9.33	6	4|0|0|6	0.75	0.99	0.75	0.99	0.75	-6.43	3.73	0.09
Telomere	P56134	ATP5MF	3|1|1|1|1|3	10	1.67	6	0|0|0|0	0.66	0.99	0.66	0.99	0.66	1.14	16.67	0.16
Telomere	P56182	RRP1	4|1|0|0|0|2	7	1.17	6	1|0|0|2	0.4	0.86	0.4	0.86	0.4	-3.71	1.56	0.29
Telomere	P56192	MARS1	18|3|3|3|5|7	39	6.5	6	5|0|0|14	0.25	0.75	0.25	0.75	0.25	-12.63	1.37	0.52
Telomere	P56282	POLE2	2|0|0|0|0|0	2	0.33	6	0|0|0|0	0.32	0.96	0.32	0.96	0.32	-1.37	3.33	0.44
Telomere	P56537	EIF6	3|3|0|0|1|3	10	1.67	6	1|0|0|1	0.81	0.81	0.81	0.81	0.81	-2.81	3.33	0.06
Telomere	P56545	CTBP2	4|8|2|3|4|5	26	4.33	6	1|0|0|1	0.98	1	0.98	1	0.98	0.13	8.67	0.01
Telomere	P56556	NDUFA6	0|1|1|0|0|0	2	0.33	6	1|0|0|0	0	0	0	0	0	-1.91	1.33	0.55
Telomere	P56945	BCAR1	2|0|0|0|0|0	2	0.33	6	0|0|0|0	0.32	0.96	0.32	0.96	0.32	-1.37	3.33	0.44
Telomere	P57075	UBASH3A	1|0|0|0|0|0	1	0.17	6	0|0|0|0	0	0	0	0	0	-1.37	1.67	0.55
Telomere	P57076	CFAP298	2|0|0|0|0|0	2	0.33	6	0|0|0|0	0.32	0.96	0.32	0.96	0.32	-1.37	3.33	0.44
Telomere	P57088	TMEM33	1|1|1|1|0|1	5	0.83	6	1|0|0|1	0	0	0	0	0	-2.81	1.67	0.55
Telomere	P57678	GEMIN4	14|2|2|1|0|4	23	3.83	6	1|0|0|8	0.33	0.91	0.33	0.91	0.33	-8.95	1.7	0.31
Telomere	P57737	CORO7	2|0|0|0|0|0	2	0.33	6	0|0|0|0	0.32	0.96	0.32	0.96	0.32	-1.37	3.33	0.44
Telomere	P57740	NUP107	17|3|0|1|1|2	24	4	6	0|0|0|22	0.14	0.43	0.14	0.43	0.14	-22.55	0.73	0.53
Telomere	P57772	EEFSEC	2|0|0|0|0|0	2	0.33	6	0|0|0|0	0.32	0.96	0.32	0.96	0.32	-1.37	3.33	0.44
Telomere	P58107	EPPK1	30|0|0|0|0|0	30	5	6	1|0|0|6	0.33	1	0.33	1	0.33	-7.32	2.86	0.39
Telomere	P58546	MTPN	1|1|1|1|2|1	7	1.17	6	1|0|0|1	0.18	0.53	0.18	0.53	0.18	-1.2	2.33	0.52
Telomere	P58876	H2BC5	5|16|11|11|14|20	77	12.83	6	7|4|3|8	0.81	1	0.81	1	0.81	-13.15	2.33	0.07
Telomere	P59998	ARPC4	2|3|3|3|1|3	15	2.5	6	3|0|0|2	0.28	0.28	0.28	0.28	0.28	-3.75	2	0.5
Telomere	P60002	ELOF1	0|1|0|0|0|0	1	0.17	6	0|0|0|0	0	0	0	0	0	-1.37	1.67	0.55
Telomere	P60174	TPI1	10|10|2|2|2|5	31	5.17	6	3|0|1|6	0.57	0.81	0.57	0.81	0.57	-6.54	2.07	0.24
Telomere	P60228	EIF3E	12|11|7|9|4|11	54	9	6	3|0|0|10	0.65	0.72	0.65	0.72	0.65	-5.66	2.77	0.19
Telomere	P60468	SEC61B	1|0|0|1|0|0	2	0.33	6	0|0|0|0	0	0	0	0	0	-1.37	3.33	0.55
Telomere	P60484	PTEN	1|0|0|0|0|0	1	0.17	6	0|0|0|0	0	0	0	0	0	-1.37	1.67	0.55
Telomere	P60510	PPP4C	0|2|0|1|1|0	4	0.67	6	0|0|0|1	0.26	0.79	0.26	0.79	0.26	-1.91	2.67	0.5
Telomere	P60660	MYL6	2|5|2|1|4|8	22	3.67	6	2|0|0|4	0.61	0.88	0.61	0.88	0.61	-4.59	2.44	0.22
Telomere	P60842	EIF4A1	34|16|12|9|8|19	98	16.33	6	10|2|5|16	0.32	0.95	0.32	0.95	0.32	-17.76	1.98	0.48
Telomere	P60866	RPS20	1|2|0|2|1|3	9	1.5	6	1|0|0|2	0.43	0.64	0.43	0.64	0.43	-3.71	2	0.28
Telomere	P60891	PRPS1	1|0|0|0|0|0	1	0.17	6	0|0|0|0	0	0	0	0	0	-1.37	1.67	0.55
Telomere	P60900	PSMA6	5|5|1|1|1|2	15	2.5	6	1|0|0|1	0.83	0.99	0.83	0.99	0.83	-1.2	5	0.06
Telomere	P60903	S100A10	1|1|0|2|0|1	5	0.83	6	0|0|0|1	0.26	0.79	0.26	0.79	0.26	-1.91	3.33	0.5
Telomere	P60953	CDC42	1|0|0|1|1|1	4	0.67	6	0|0|0|1	0	0	0	0	0	-1.91	2.67	0.55
Telomere	P60981	DSTN	1|3|1|1|1|3	10	1.67	6	1|0|0|0	0.63	0.95	0.63	0.95	0.63	-0.3	6.67	0.21
Telomere	P60983	GMFB	1|0|0|0|0|1	2	0.33	6	0|0|0|0	0	0	0	0	0	-1.37	3.33	0.55
Telomere	P61006	RAB8A	2|0|1|0|0|1	4	0.67	6	0|0|0|1	0.26	0.79	0.26	0.79	0.26	-1.91	2.67	0.5
Telomere	P61009	SPCS3	0|1|0|0|0|1	2	0.33	6	0|0|0|0	0	0	0	0	0	-1.37	3.33	0.55
Telomere	P61011	SRP54	6|1|2|0|1|1	11	1.83	6	0|0|0|2	0.51	0.97	0.51	0.97	0.51	-2.91	3.67	0.26
Telomere	P61019	RAB2A	1|1|0|1|0|2	5	0.83	6	0|0|0|1	0.26	0.79	0.26	0.79	0.26	-1.91	3.33	0.5
Telomere	P61024	CKS1B	0|1|0|0|0|0	1	0.17	6	0|0|0|0	0	0	0	0	0	-1.37	1.67	0.55
Telomere	P61026	RAB10	1|1|0|0|1|1	4	0.67	6	0|0|0|1	0	0	0	0	0	-1.91	2.67	0.55
Telomere	P61077	UBE2D3	0|1|0|1|0|0	2	0.33	6	0|0|0|1	0	0	0	0	0	-1.91	1.33	0.55
Telomere	P61081	UBE2M	2|3|0|0|0|0	5	0.83	6	0|0|0|0	0.65	0.99	0.65	0.99	0.65	-1.37	8.33	0.18
Telomere	P61086	UBE2K	1|2|1|0|1|1	6	1	6	1|0|0|1	0.18	0.53	0.18	0.53	0.18	-2.81	2	0.52
Telomere	P61088	UBE2N	0|3|2|1|0|2	8	1.33	6	3|0|0|1	0.3	0.46	0.3	0.46	0.3	-4.16	1.33	0.49
Telomere	P61106	RAB14	3|1|1|2|1|3	11	1.83	6	0|0|0|2	0.7	0.77	0.7	0.77	0.7	-0.86	3.67	0.11
Telomere	P61158	ACTR3	9|5|2|3|2|3	24	4	6	2|0|0|7	0.33	0.76	0.33	0.76	0.33	-5.34	1.78	0.43
Telomere	P61160	ACTR2	7|2|1|0|0|2	12	2	6	0|0|0|6	0.32	0.8	0.32	0.8	0.32	-6.07	1.33	0.44
Telomere	P61163	ACTR1A	6|0|2|1|4|6	19	3.17	6	1|0|0|2	0.94	0.99	0.94	0.99	0.94	-3.71	4.22	0.02
Telomere	P61201	COPS2	3|5|0|2|0|0	10	1.67	6	0|0|0|1	0.91	1	0.91	1	0.91	-1.91	6.67	0.03
Telomere	P61204	ARF3	4|2|1|2|2|4	15	2.5	6	1|0|0|0	0.92	0.99	0.92	0.99	0.92	-0.3	10	0.02
Telomere	P61221	ABCE1	15|8|2|5|5|10	45	7.5	6	3|0|0|8	0.68	0.91	0.68	0.91	0.68	-7.24	2.73	0.12
Telomere	P61224	RAP1B	1|0|1|1|0|2	5	0.83	6	0|0|0|1	0.26	0.79	0.26	0.79	0.26	-1.91	3.33	0.5
Telomere	P61225	RAP2B	0|0|1|0|0|1	2	0.33	6	0|0|0|0	0	0	0	0	0	-1.37	3.33	0.55
Telomere	P61247	RPS3A	5|16|12|9|2|11	55	9.17	6	6|0|1|4	0.9	0.97	0.9	0.97	0.9	-7.49	3.33	0.04
Telomere	P61254	RPL26	0|2|5|5|0|2	14	2.33	6	3|2|0|0	0.51	0.72	0.51	0.72	0.51	-5.38	1.87	0.26
Telomere	P61289	PSME3	7|21|8|9|7|10	62	10.33	6	7|0|0|6	0.59	0.97	0.59	0.97	0.59	-2.41	3.18	0.23
Telomere	P61313	RPL15	3|5|21|17|5|6	57	9.5	6	24|13|9|4	0	0	0	0	0	-44.23	0.76	0.55
Telomere	P61326	MAGOH	2|3|1|1|1|4	12	2	6	0|0|0|0	0.98	1	0.98	1	0.98	1.14	20	0.01
Telomere	P61353	RPL27	0|4|5|7|0|3	19	3.17	6	3|1|2|0	0.68	0.97	0.68	0.97	0.68	-6.64	2.11	0.11
Telomere	P61421	ATP6V0D1	4|0|0|0|0|0	4	0.67	6	0|0|0|0	0.33	1	0.33	1	0.33	-1.37	6.67	0.37
Telomere	P61457	PCBD1	0|3|0|0|0|0	3	0.5	6	0|0|0|0	0.33	0.99	0.33	0.99	0.33	-1.37	5	0.4
Telomere	P61513	RPL37A	0|0|1|0|0|0	1	0.17	6	0|0|0|1	0	0	0	0	0	-1.91	0.67	0.55
Telomere	P61586	RHOA	2|1|0|0|0|0	3	0.5	6	0|0|0|0	0.32	0.96	0.32	0.96	0.32	-1.37	5	0.44
Telomere	P61604	HSPE1	0|3|3|2|4|9	21	3.5	6	3|0|0|0	0.8	0.98	0.8	0.98	0.8	-3.95	4.67	0.07
Telomere	P61619	SEC61A1	4|0|0|0|2|2	8	1.33	6	0|0|0|0	0.97	1	0.97	1	0.97	-1.37	13.33	0.01
Telomere	P61758	VBP1	3|1|1|2|1|3	11	1.83	6	0|0|0|0	0.98	0.99	0.98	0.99	0.98	1.14	18.33	0.01
Telomere	P61764	STXBP1	5|0|0|0|0|0	5	0.83	6	0|0|0|0	0.33	1	0.33	1	0.33	-1.37	8.33	0.35
Telomere	P61803	DAD1	1|0|0|1|0|0	2	0.33	6	0|0|0|0	0	0	0	0	0	-1.37	3.33	0.55
Telomere	P61923	COPZ1	4|1|0|0|0|1	6	1	6	0|0|0|0	0.33	1	0.33	1	0.33	-1.37	10	0.37
Telomere	P61927	RPL37	0|1|2|3|0|0	6	1	6	1|2|0|0	0.32	0.64	0.32	0.64	0.32	-3.71	1.33	0.44
Telomere	P61956	SUMO2	2|3|0|0|0|2	7	1.17	6	0|0|0|1	0.85	0.95	0.85	0.95	0.85	-1.91	4.67	0.05
Telomere	P61960	UFM1	0|2|0|0|0|0	2	0.33	6	0|0|0|0	0.32	0.96	0.32	0.96	0.32	-1.37	3.33	0.44
Telomere	P61962	DCAF7	4|2|0|2|0|0	8	1.33	6	0|0|0|4	0.43	0.69	0.43	0.69	0.43	-3.82	1.33	0.29
Telomere	P61964	WDR5	4|5|1|1|1|2	14	2.33	6	0|0|0|0	0.99	1	0.99	1	0.99	1.14	23.33	0
Telomere	P61966	AP1S1	1|0|1|1|0|0	3	0.5	6	0|0|0|3	0	0	0	0	0	-3.95	0.67	0.55
Telomere	P61970	NUTF2	1|0|0|0|0|0	1	0.17	6	0|0|0|0	0	0	0	0	0	-1.37	1.67	0.55
Telomere	P61978	HNRNPK	21|28|17|16|21|25	128	21.33	6	10|2|5|7	0.98	1	0.98	1	0.98	-1.25	3.56	0.01
Telomere	P61981	YWHAG	1|3|0|0|1|5	10	1.67	6	0|0|0|2	0.57	0.94	0.57	0.94	0.57	-2.91	3.33	0.24
Telomere	P62081	RPS7	3|4|2|2|5|7	23	3.83	6	2|1|2|1	0.66	0.95	0.66	0.95	0.66	-3.3	2.56	0.17
Telomere	P62136	PPP1CA	10|9|3|3|3|4	32	5.33	6	2|0|0|5	0.67	0.91	0.67	0.91	0.67	-2.26	3.05	0.12
Telomere	P62140	PPP1CB	2|1|0|0|0|0	3	0.5	6	0|0|0|0	0.32	0.96	0.32	0.96	0.32	-1.37	5	0.44
Telomere	P62191	PSMC1	12|14|7|5|5|6	49	8.17	6	2|0|0|9	0.66	0.88	0.66	0.88	0.66	-2.76	2.97	0.16
Telomere	P62195	PSMC5	12|13|5|5|1|9	45	7.5	6	3|0|0|5	0.91	0.96	0.91	0.96	0.91	-6.06	3.75	0.03
Telomere	P62241	RPS8	3|7|12|11|5|10	48	8	6	12|3|2|4	0.02	0.03	0.02	0.03	0.02	-14.81	1.52	0.54
Telomere	P62244	RPS15A	1|4|1|2|2|3	13	2.17	6	2|0|0|3	0.3	0.52	0.3	0.52	0.3	-3.75	1.73	0.49
Telomere	P62249	RPS16	2|6|8|7|4|9	36	6	6	5|2|2|8	0.02	0.03	0.02	0.03	0.02	-13.16	1.41	0.54
Telomere	P62258	YWHAE	6|15|5|6|4|8	44	7.33	6	3|0|2|6	0.51	0.98	0.51	0.98	0.51	-4.52	2.67	0.26
Telomere	P62263	RPS14	2|5|4|4|0|5	20	3.33	6	4|0|0|3	0.36	0.43	0.36	0.43	0.36	-7.52	1.9	0.3
Telomere	P62266	RPS23	1|2|5|5|2|5	20	3.33	6	4|1|1|2	0.28	0.28	0.28	0.28	0.28	-6.5	1.67	0.5
Telomere	P62269	RPS18	0|5|2|5|1|10	23	3.83	6	2|2|2|1	0.65	1	0.65	1	0.65	-7.66	2.19	0.19
Telomere	P62273	RPS29	0|0|0|0|0|1	1	0.17	6	0|0|0|0	0	0	0	0	0	-1.37	1.67	0.55
Telomere	P62277	RPS13	2|6|7|3|3|4	25	4.17	6	3|2|0|3	0.5	0.82	0.5	0.82	0.5	-5.07	2.08	0.26
Telomere	P62280	RPS11	1|5|6|9|2|5	28	4.67	6	4|0|0|3	0.65	0.9	0.65	0.9	0.65	-5.56	2.67	0.19
Telomere	P62304	SNRPE	1|5|2|3|5|4	20	3.33	6	2|1|0|2	0.72	0.8	0.72	0.8	0.72	-3.9	2.67	0.1
Telomere	P62306	SNRPF	2|2|0|0|0|0	4	0.67	6	0|0|0|0	0.64	0.96	0.64	0.96	0.64	-1.37	6.67	0.2
Telomere	P62310	LSM3	0|1|0|0|0|0	1	0.17	6	0|0|0|0	0	0	0	0	0	-1.37	1.67	0.55
Telomere	P62312	LSM6	0|2|0|0|0|0	2	0.33	6	0|0|0|0	0.32	0.96	0.32	0.96	0.32	-1.37	3.33	0.44
Telomere	P62314	SNRPD1	0|4|1|2|0|3	10	1.67	6	2|1|0|0	0.61	0.86	0.61	0.86	0.61	-3.71	2.22	0.22
Telomere	P62316	SNRPD2	2|3|2|1|1|2	11	1.83	6	0|1|0|0	0.85	0.95	0.85	0.95	0.85	-0.3	7.33	0.05
Telomere	P62318	SNRPD3	3|5|3|2|1|1	15	2.5	6	3|0|0|3	0.3	0.58	0.3	0.58	0.3	-4.66	1.67	0.5
Telomere	P62330	ARF6	3|1|0|1|0|0	5	0.83	6	0|0|0|1	0.32	0.95	0.32	0.95	0.32	-1.91	3.33	0.48
Telomere	P62333	PSMC6	4|7|5|4|3|5	28	4.67	6	3|0|0|3	0.67	0.85	0.67	0.85	0.67	-1.69	3.11	0.12
Telomere	P62424	RPL7A	3|11|9|13|2|6	44	7.33	6	11|5|4|7	0	0	0	0	0	-23.43	1.09	0.55
Telomere	P62487	POLR2G	2|2|0|0|0|0	4	0.67	6	0|0|0|0	0.64	0.96	0.64	0.96	0.64	-1.37	6.67	0.2
Telomere	P62491	RAB11A	1|1|0|0|0|2	4	0.67	6	0|0|0|0	0.32	0.96	0.32	0.96	0.32	-1.37	6.67	0.44
Telomere	P62495	ETF1	11|12|6|10|3|4	46	7.67	6	3|0|0|6	0.87	0.9	0.87	0.9	0.87	-3.9	3.41	0.05
Telomere	P62633	CNBP	0|1|0|1|0|0	2	0.33	6	1|0|0|1	0	0	0	0	0	-2.81	0.67	0.55
Telomere	P62701	RPS4X	6|10|11|7|7|16	57	9.5	6	7|1|1|6	0.53	0.93	0.53	0.93	0.53	-5.21	2.53	0.25
Telomere	P62714	PPP2CB	4|3|1|1|3|7	19	3.17	6	1|0|0|4	0.57	0.86	0.57	0.86	0.57	-3.56	2.53	0.23
Telomere	P62750	RPL23A	1|3|3|2|0|5	14	2.33	6	1|1|1|2	0.44	0.8	0.44	0.8	0.44	-5.53	1.87	0.28
Telomere	P62753	RPS6	3|2|8|9|2|8	32	5.33	6	5|2|2|6	0.11	0.21	0.11	0.21	0.11	-11.5	1.42	0.53
Telomere	P62805	H4C1	8|11|11|9|12|18	69	11.5	6	6|7|3|16	0	0	0	0	0	-16.94	1.44	0.55
Telomere	P62820	RAB1A	2|2|3|3|1|3	14	2.33	6	3|0|1|4	0.03	0.03	0.03	0.03	0.03	-6.35	1.17	0.54
Telomere	P62826	RAN	4|18|8|8|5|10	53	8.83	6	5|1|0|7	0.54	0.96	0.54	0.96	0.54	-6.04	2.72	0.24
Telomere	P62829	RPL23	3|6|5|7|1|11	33	5.5	6	3|2|1|5	0.49	0.99	0.49	0.99	0.49	-9.53	2	0.26
Telomere	P62841	RPS15	0|0|0|0|0|2	2	0.33	6	0|0|0|1	0.26	0.79	0.26	0.79	0.26	-1.91	1.33	0.5
Telomere	P62847	RPS24	3|2|5|4|3|3	20	3.33	6	1|0|1|1	0.81	0.95	0.81	0.95	0.81	-0.69	4.44	0.06
Telomere	P62851	RPS25	1|5|7|8|2|4	27	4.5	6	2|2|2|2	0.68	0.94	0.68	0.94	0.68	-6.5	2.25	0.11
Telomere	P62854	RPS26	0|1|0|2|1|5	9	1.5	6	2|0|0|1	0.43	0.96	0.43	0.96	0.43	-3.71	2	0.28
Telomere	P62857	RPS28	0|1|1|1|1|4	8	1.33	6	0|0|1|1	0.32	0.95	0.32	0.95	0.32	-2.81	2.67	0.49
Telomere	P62861	FAU	0|2|2|2|1|3	10	1.67	6	1|1|0|1	0.43	0.63	0.43	0.63	0.43	-3.71	2.22	0.28
Telomere	P62875	POLR2L	0|1|0|0|0|0	1	0.17	6	0|0|0|0	0	0	0	0	0	-1.37	1.67	0.55
Telomere	P62879	GNB2	3|2|1|1|1|4	12	2	6	1|0|0|2	0.61	0.86	0.61	0.86	0.61	-2.11	2.67	0.22
Telomere	P62888	RPL30	0|2|4|3|4|4	17	2.83	6	2|0|0|2	0.71	0.71	0.71	0.71	0.71	-4.37	2.83	0.1
Telomere	P62891	RPL39	0|1|0|1|0|0	2	0.33	6	1|1|0|0	0	0	0	0	0	-2.81	0.67	0.55
Telomere	P62899	RPL31	0|2|1|1|1|6	11	1.83	6	1|0|1|1	0.44	0.99	0.44	0.99	0.44	-3.71	2.44	0.28
Telomere	P62906	RPL10A	3|2|2|2|1|3	13	2.17	6	2|0|0|4	0.13	0.17	0.13	0.17	0.13	-4.59	1.44	0.53
Telomere	P62910	RPL32	0|4|6|9|0|2	21	3.5	6	5|4|2|2	0.18	0.53	0.18	0.53	0.18	-14.03	1.08	0.52
Telomere	P62913	RPL11	2|6|7|5|1|9	30	5	6	2|2|2|8	0.08	0.21	0.08	0.21	0.08	-12.18	1.43	0.53
Telomere	P62917	RPL8	0|5|8|7|2|8	30	5	6	6|2|1|3	0.28	0.34	0.28	0.34	0.28	-12.79	1.67	0.5
Telomere	P62937	PPIA	11|13|10|9|7|15	65	10.83	6	9|3|3|13	0	0	0	0	0	-14.93	1.55	0.55
Telomere	P62942	FKBP1A	2|1|1|0|0|0	4	0.67	6	1|0|0|0	0.26	0.79	0.26	0.79	0.26	-1.91	2.67	0.5
Telomere	P62979	RPS27A	8|9|4|5|8|12	46	7.67	6	5|3|4|11	0	0.01	0	0.01	0	-15.28	1.33	0.54
Telomere	P62993	GRB2	4|5|0|0|0|5	14	2.33	6	0|0|0|0	1	1	1	1	1	-1.37	23.33	0
Telomere	P62995	TRA2B	2|8|2|3|1|2	18	3	6	0|0|1|0	0.92	1	0.92	1	0.92	-0.3	12	0.03
Telomere	P63000	RAC1	2|2|2|2|0|0	8	1.33	6	1|0|0|2	0.33	0.33	0.33	0.33	0.33	-3.71	1.78	0.39
Telomere	P63010	AP2B1	33|3|1|4|2|7	50	8.33	6	2|0|0|28	0.29	0.88	0.29	0.88	0.29	-27.88	1.11	0.5
Telomere	P63027	VAMP2	0|1|0|0|0|1	2	0.33	6	0|0|0|0	0	0	0	0	0	-1.37	3.33	0.55
Telomere	P63092	GNAS	3|0|0|0|0|0	3	0.5	6	0|0|0|0	0.33	0.99	0.33	0.99	0.33	-1.37	5	0.4
Telomere	P63096	GNAI1	1|1|0|1|0|0	3	0.5	6	0|0|0|0	0	0	0	0	0	-1.37	5	0.55
Telomere	P63098	PPP3R1	3|0|0|0|0|0	3	0.5	6	1|0|0|0	0.32	0.95	0.32	0.95	0.32	-1.91	2	0.48
Telomere	P63104	YWHAZ	11|14|11|9|8|17	70	11.67	6	7|3|3|18	0	0	0	0	0	-15.79	1.51	0.55
Telomere	P63151	PPP2R2A	6|3|0|0|1|2	12	2	6	0|0|0|1	0.92	1	0.92	1	0.92	-1.91	8	0.03
Telomere	P63167	DYNLL1	0|1|0|0|0|1	2	0.33	6	0|0|0|0	0	0	0	0	0	-1.37	3.33	0.55
Telomere	P63173	RPL38	0|1|2|2|0|1	6	1	6	0|0|0|2	0.38	0.57	0.38	0.57	0.38	-2.91	2	0.3
Telomere	P63208	SKP1	6|4|1|4|1|2	18	3	6	1|0|0|2	0.9	0.99	0.9	0.99	0.9	-2.11	4	0.03
Telomere	P63220	RPS21	0|3|1|0|0|3	7	1.17	6	0|0|0|0	0.66	0.99	0.66	0.99	0.66	-1.37	11.67	0.16
Telomere	P63241	EIF5A	8|9|3|6|9|13	48	8	6	2|1|0|3	1	1	1	1	1	-1.93	5.33	0
Telomere	P63244	RACK1	8|8|7|6|9|11	49	8.17	6	3|2|1|12	0.04	0.1	0.04	0.1	0.04	-7.33	1.81	0.54
Telomere	P63261	ACTG1	43|23|22|22|19|49	178	29.67	6	19|9|8|49	0	0	0	0	0	-47.01	1.4	0.55
Telomere	P63267	ACTG2	6|4|2|1|3|6	22	3.67	6	3|1|0|4	0.37	0.51	0.37	0.51	0.37	-6.35	1.83	0.3
Telomere	P63272	SUPT4H1	0|1|0|0|0|2	3	0.5	6	0|0|0|0	0.32	0.96	0.32	0.96	0.32	-1.37	5	0.44
Telomere	P63279	UBE2I	2|2|0|1|1|1	7	1.17	6	0|0|0|2	0.38	0.57	0.38	0.57	0.38	-2.91	2.33	0.3
Telomere	P67809	YBX1	2|7|7|6|1|13	36	6	6	3|2|1|1	0.94	1	0.94	1	0.94	-5.7	3.43	0.02
Telomere	P67812	SEC11A	0|0|2|0|0|0	2	0.33	6	1|0|0|0	0.26	0.79	0.26	0.79	0.26	-1.91	1.33	0.5
Telomere	P67870	CSNK2B	0|7|0|1|1|2	11	1.83	6	1|0|0|0	0.6	1	0.6	1	0.6	-1.91	7.33	0.22
Telomere	P67936	TPM4	1|5|3|4|2|6	21	3.5	6	2|0|0|1	0.93	0.99	0.93	0.99	0.93	-2.11	4.67	0.02
Telomere	P68036	UBE2L3	3|0|0|0|3|3	9	1.5	6	0|0|0|0	0.99	0.99	0.99	0.99	0.99	-1.37	15	0
Telomere	P68104	EEF1A1	83|20|23|25|31|48	230	38.33	6	27|9|8|49	0.06	0.19	0.06	0.19	0.06	-52.74	1.65	0.54
Telomere	P68133	ACTA1	0|1|1|0|0|1	3	0.5	6	0|0|0|0	0	0	0	0	0	-1.37	5	0.55
Telomere	P68366	TUBA4A	18|21|18|23|26|41	147	24.5	6	14|4|3|24	0.22	0.65	0.22	0.65	0.22	-14.66	2.18	0.52
Telomere	P68371	TUBB4B	6|4|6|4|4|6	30	5	6	3|1|1|8	0.03	0.03	0.03	0.03	0.03	-6.04	1.54	0.54
Telomere	P68400	CSNK2A1	4|8|1|5|2|3	23	3.83	6	1|0|0|2	0.94	1	0.94	1	0.94	-2.11	5.11	0.02
Telomere	P68402	PAFAH1B2	1|1|1|1|2|3	9	1.5	6	2|0|0|1	0.32	0.64	0.32	0.64	0.32	-2.11	2	0.44
Telomere	P68431	H3C1	0|0|0|0|0|1	1	0.17	6	0|0|0|0	0	0	0	0	0	-1.37	1.67	0.55
Telomere	P68871	HBB	1|0|0|1|0|0	2	0.33	6	2|1|1|0	0	0	0	0	0	-4.4	0.33	0.55
Telomere	P69905	HBA1	0|1|0|2|0|0	3	0.5	6	0|3|3|0	0.02	0.05	0.02	0.05	0.02	-6.47	0.33	0.54
Telomere	P78316	NOP14	8|1|0|1|0|1	11	1.83	6	1|0|0|4	0.3	0.9	0.3	0.9	0.3	-5.18	1.47	0.49
Telomere	P78318	IGBP1	0|3|0|1|0|0	4	0.67	6	0|0|0|1	0.32	0.95	0.32	0.95	0.32	-1.91	2.67	0.48
Telomere	P78332	RBM6	1|5|0|0|0|0	6	1	6	0|0|0|0	0.33	1	0.33	1	0.33	-1.37	10	0.35
Telomere	P78344	EIF4G2	31|2|3|4|2|5	47	7.83	6	5|0|0|9	0.33	0.99	0.33	0.99	0.33	-9.86	2.24	0.39
Telomere	P78345	RPP38	2|0|0|0|0|0	2	0.33	6	0|0|0|1	0.26	0.79	0.26	0.79	0.26	-1.91	1.33	0.5
Telomere	P78346	RPP30	8|1|0|0|0|0	9	1.5	6	0|0|0|1	0.33	1	0.33	1	0.33	-1.91	6	0.33
Telomere	P78347	GTF2I	26|25|9|11|7|9	87	14.5	6	4|0|0|4	0.98	1	0.98	1	0.98	0.63	7.25	0.01
Telomere	P78362	SRPK2	3|1|0|0|0|0	4	0.67	6	0|0|0|1	0.32	0.95	0.32	0.95	0.32	-1.91	2.67	0.48
Telomere	P78368	CSNK1G2	1|0|0|0|0|0	1	0.17	6	0|0|0|0	0	0	0	0	0	-1.37	1.67	0.55
Telomere	P78371	CCT2	33|14|8|6|5|28	94	15.67	6	8|1|3|21	0.43	0.83	0.43	0.83	0.43	-22.21	1.9	0.28
Telomere	P78381	SLC35A2	1|0|0|0|0|0	1	0.17	6	0|0|0|0	0	0	0	0	0	-1.37	1.67	0.55
Telomere	P78395	PRAME	1|0|0|0|0|0	1	0.17	6	0|0|0|0	0	0	0	0	0	-1.37	1.67	0.55
Telomere	P78406	RAE1	1|0|1|1|0|0	3	0.5	6	0|0|0|4	0	0	0	0	0	-3.82	0.5	0.55
Telomere	P78417	GSTO1	3|5|2|3|2|2	17	2.83	6	2|0|0|2	0.58	0.87	0.58	0.87	0.58	-1.51	2.83	0.23
Telomere	P78527	PRKDC	94|109|44|45|33|46	371	61.83	6	23|0|0|51	0.64	0.97	0.64	0.97	0.64	-20.45	3.34	0.19
Telomere	P80303	NUCB2	0|1|0|0|1|0	2	0.33	6	0|0|0|0	0	0	0	0	0	-1.37	3.33	0.55
Telomere	P81605	DCD	0|2|2|3|2|2	11	1.83	6	2|2|1|3	0.01	0.03	0.01	0.03	0.01	-8.6	0.92	0.54
Telomere	P82094	TMF1	4|0|0|0|0|0	4	0.67	6	0|0|0|0	0.33	1	0.33	1	0.33	-1.37	6.67	0.37
Telomere	P82650	MRPS22	0|0|2|1|0|3	6	1	6	1|0|0|0	0.58	0.95	0.58	0.95	0.58	-1.91	4	0.23
Telomere	P82664	MRPS10	0|1|1|0|0|0	2	0.33	6	2|0|0|0	0	0	0	0	0	-2.91	0.67	0.55
Telomere	P82673	MRPS35	0|1|1|1|1|2	6	1	6	1|0|0|0	0.26	0.79	0.26	0.79	0.26	-1.91	4	0.5
Telomere	P82675	MRPS5	2|0|4|1|2|1	10	1.67	6	4|0|0|0	0.43	0.69	0.43	0.69	0.43	-3.82	1.67	0.29
Telomere	P82909	MRPS36	0|1|0|0|0|0	1	0.17	6	1|0|0|0	0	0	0	0	0	-1.91	0.67	0.55
Telomere	P82914	MRPS15	1|0|0|0|0|1	2	0.33	6	0|0|0|1	0	0	0	0	0	-1.91	1.33	0.55
Telomere	P82921	MRPS21	1|1|0|1|0|0	3	0.5	6	0|0|0|0	0	0	0	0	0	-1.37	5	0.55
Telomere	P82930	MRPS34	0|2|2|1|3|1	9	1.5	6	2|0|1|0	0.43	0.64	0.43	0.64	0.43	-3.71	2	0.28
Telomere	P82932	MRPS6	0|1|0|0|1|1	3	0.5	6	0|0|0|0	0	0	0	0	0	-1.37	5	0.55
Telomere	P82933	MRPS9	3|1|2|2|2|2	12	2	6	2|0|0|1	0.43	0.64	0.43	0.64	0.43	-2.11	2.67	0.28
Telomere	P82979	SARNP	2|9|1|2|0|4	18	3	6	1|0|0|1	0.83	1	0.83	1	0.83	-2.81	6	0.06
Telomere	P83436	COG7	8|0|0|0|0|0	8	1.33	6	0|0|0|1	0.33	1	0.33	1	0.33	-1.91	5.33	0.33
Telomere	P83731	RPL24	1|5|6|6|3|7	28	4.67	6	6|2|3|4	0.01	0.02	0.01	0.02	0.01	-13.51	1.24	0.54
Telomere	P83876	TXNL4A	0|1|0|0|0|0	1	0.17	6	1|0|0|0	0	0	0	0	0	-1.91	0.67	0.55
Telomere	P83881	RPL36A	0|1|3|1|0|0	5	0.83	6	0|0|0|0	0.33	0.99	0.33	0.99	0.33	-1.37	8.33	0.4
Telomere	P83916	CBX1	2|3|0|0|2|3	10	1.67	6	0|0|0|0	0.98	0.99	0.98	0.99	0.98	-1.37	16.67	0.01
Telomere	P84022	SMAD3	1|1|1|1|0|0	4	0.67	6	0|0|0|1	0	0	0	0	0	-1.91	2.67	0.55
Telomere	P84085	ARF5	2|0|0|0|0|0	2	0.33	6	0|0|0|0	0.32	0.96	0.32	0.96	0.32	-1.37	3.33	0.44
Telomere	P84090	ERH	1|3|1|1|0|0	6	1	6	1|0|0|0	0.32	0.95	0.32	0.95	0.32	-1.91	4	0.48
Telomere	P84095	RHOG	2|0|0|0|0|1	3	0.5	6	0|0|0|0	0.32	0.96	0.32	0.96	0.32	-1.37	5	0.44
Telomere	P84098	RPL19	2|5|5|9|4|4	29	4.83	6	6|2|1|2	0.25	0.69	0.25	0.69	0.25	-7.64	1.76	0.51
Telomere	P84103	SRSF3	0|2|1|1|1|2	7	1.17	6	1|0|1|1	0.22	0.33	0.22	0.33	0.22	-3.71	1.56	0.52
Telomere	P85037	FOXK1	1|3|0|0|0|1	5	0.83	6	0|0|0|0	0.33	0.99	0.33	0.99	0.33	-1.37	8.33	0.4
Telomere	P86790	CCZ1B	1|0|0|0|0|0	1	0.17	6	0|0|0|0	0	0	0	0	0	-1.37	1.67	0.55
Telomere	P98170	XIAP	1|0|0|0|0|0	1	0.17	6	0|0|0|0	0	0	0	0	0	-1.37	1.67	0.55
Telomere	P98171	ARHGAP4	2|0|1|0|0|0	3	0.5	6	1|0|0|0	0.26	0.79	0.26	0.79	0.26	-1.91	2	0.5
Telomere	P98175	RBM10	7|10|3|4|1|3	28	4.67	6	0|0|0|0	1	1	1	1	1	1.14	46.67	0
Telomere	P98179	RBM3	1|2|0|0|0|0	3	0.5	6	0|0|0|0	0.32	0.96	0.32	0.96	0.32	-1.37	5	0.44
Telomere	P98194	ATP2C1	8|0|0|0|0|0	8	1.33	6	0|0|0|1	0.33	1	0.33	1	0.33	-1.91	5.33	0.33
Telomere	P99999	CYCS	0|1|1|1|1|1	5	0.83	6	1|0|0|1	0	0	0	0	0	-2.81	1.67	0.55
Telomere	Q00059	TFAM	2|2|2|1|1|1	9	1.5	6	1|0|0|0	0.79	0.79	0.79	0.79	0.79	-0.3	6	0.07
Telomere	Q00169	PITPNA	1|1|0|0|0|1	3	0.5	6	0|0|0|0	0	0	0	0	0	-1.37	5	0.55
Telomere	Q00325	SLC25A3	4|1|3|1|1|4	14	2.33	6	2|0|0|0	0.85	0.88	0.85	0.88	0.85	-0.86	4.67	0.06
Telomere	Q00341	HDLBP	21|2|2|1|1|6	33	5.5	6	4|0|0|10	0.32	0.94	0.32	0.94	0.32	-11.76	1.57	0.44
Telomere	Q00403	GTF2B	1|5|1|2|0|0	9	1.5	6	1|0|0|2	0.43	0.96	0.43	0.96	0.43	-3.71	2	0.28
Telomere	Q00534	CDK6	2|3|0|0|0|0	5	0.83	6	0|0|0|0	0.65	0.99	0.65	0.99	0.65	-1.37	8.33	0.18
Telomere	Q00535	CDK5	3|0|0|0|0|0	3	0.5	6	0|0|0|0	0.33	0.99	0.33	0.99	0.33	-1.37	5	0.4
Telomere	Q00577	PURA	0|0|1|0|0|0	1	0.17	6	0|0|0|0	0	0	0	0	0	-1.37	1.67	0.55
Telomere	Q00610	CLTC	90|26|30|38|31|51	266	44.33	6	34|0|4|90	0	0	0	0	0	-74.56	1.39	0.55
Telomere	Q00613	HSF1	2|4|0|1|0|0	7	1.17	6	0|0|0|0	0.65	1	0.65	1	0.65	-1.37	11.67	0.17
Telomere	Q00653	NFKB2	6|0|0|1|0|0	7	1.17	6	0|0|0|2	0.32	0.97	0.32	0.97	0.32	-2.91	2.33	0.43
Telomere	Q00688	FKBP3	0|1|0|0|0|1	2	0.33	6	0|0|0|0	0	0	0	0	0	-1.37	3.33	0.55
Telomere	Q00765	REEP5	0|1|0|0|0|1	2	0.33	6	0|0|0|0	0	0	0	0	0	-1.37	3.33	0.55
Telomere	Q00796	SORD	6|6|1|2|1|5	21	3.5	6	2|0|0|8	0.2	0.24	0.2	0.24	0.2	-7.87	1.4	0.52
Telomere	Q00839	HNRNPU	30|36|19|18|22|28	153	25.5	6	8|1|2|12	0.98	0.99	0.98	0.99	0.98	-0.34	4.43	0.01
Telomere	Q01081	U2AF1	3|2|1|1|0|1	8	1.33	6	1|0|0|0	0.58	0.95	0.58	0.95	0.58	-1.91	5.33	0.23
Telomere	Q01082	SPTBN1	58|4|5|3|4|13	87	14.5	6	2|0|0|22	0.33	0.98	0.33	0.98	0.33	-16.89	2.42	0.31
Telomere	Q01085	TIAL1	5|4|1|1|1|0	12	2	6	0|0|0|1	0.66	1	0.66	1	0.66	-1.91	8	0.16
Telomere	Q01105	SET	0|9|5|3|2|7	26	4.33	6	3|0|0|0	0.92	0.98	0.92	0.98	0.92	-3.95	5.78	0.03
Telomere	Q01130	SRSF2	1|4|1|2|0|3	11	1.83	6	1|0|1|0	0.76	0.95	0.76	0.95	0.76	-2.81	3.67	0.08
Telomere	Q01167	FOXK2	2|1|0|0|0|2	5	0.83	6	0|0|0|0	0.64	0.96	0.64	0.96	0.64	-1.37	8.33	0.2
Telomere	Q01196	RUNX1	0|1|0|0|0|0	1	0.17	6	0|0|0|0	0	0	0	0	0	-1.37	1.67	0.55
Telomere	Q01415	GALK2	0|0|0|1|0|0	1	0.17	6	1|0|0|1	0	0	0	0	0	-2.81	0.33	0.55
Telomere	Q01433	AMPD2	2|0|1|0|0|0	3	0.5	6	0|0|0|0	0.32	0.96	0.32	0.96	0.32	-1.37	5	0.44
Telomere	Q01469	FABP5	0|3|3|5|1|0	12	2	6	4|1|1|1	0.19	0.46	0.19	0.46	0.19	-7.66	1.14	0.52
Telomere	Q01518	CAP1	6|5|2|0|1|4	18	3	6	2|0|1|6	0.19	0.33	0.19	0.33	0.19	-9.31	1.33	0.52
Telomere	Q01650	SLC7A5	2|0|1|1|0|1	5	0.83	6	0|0|0|0	0.32	0.96	0.32	0.96	0.32	-1.37	8.33	0.44
Telomere	Q01658	DR1	1|1|0|0|1|1	4	0.67	6	0|0|0|0	0	0	0	0	0	-1.37	6.67	0.55
Telomere	Q01780	EXOSC10	10|8|1|1|2|4	26	4.33	6	2|0|0|8	0.46	0.77	0.46	0.77	0.46	-7.87	1.73	0.27
Telomere	Q01804	OTUD4	1|0|1|0|0|0	2	0.33	6	0|0|0|0	0	0	0	0	0	-1.37	3.33	0.55
Telomere	Q01813	PFKP	16|10|7|7|4|7	51	8.5	6	7|0|0|12	0.2	0.57	0.2	0.57	0.2	-11.13	1.79	0.52
Telomere	Q01831	XPC	1|1|0|0|0|0	2	0.33	6	0|0|0|0	0	0	0	0	0	-1.37	3.33	0.55
Telomere	Q01844	EWSR1	8|4|4|3|2|2	23	3.83	6	2|0|0|2	0.8	0.99	0.8	0.99	0.8	-1.51	3.83	0.07
Telomere	Q01968	OCRL	7|0|0|0|0|0	7	1.17	6	0|0|0|0	0.33	1	0.33	1	0.33	-1.37	11.67	0.33
Telomere	Q01970	PLCB3	9|4|1|1|0|2	17	2.83	6	1|0|0|2	0.73	1	0.73	1	0.73	-3.71	3.78	0.1
Telomere	Q02040	AKAP17A	0|2|0|0|0|0	2	0.33	6	0|0|0|0	0.32	0.96	0.32	0.96	0.32	-1.37	3.33	0.44
Telomere	Q02218	OGDH	6|4|6|8|5|8	37	6.17	6	8|0|0|2	0.46	0.56	0.46	0.56	0.46	-3.19	2.47	0.27
Telomere	Q02241	KIF23	8|2|0|0|1|0	11	1.83	6	0|0|0|1	0.6	1	0.6	1	0.6	-1.91	7.33	0.22
Telomere	Q02252	ALDH6A1	0|1|0|1|0|0	2	0.33	6	1|0|0|0	0	0	0	0	0	-1.91	1.33	0.55
Telomere	Q02413	DSG1	1|7|4|3|1|4	20	3.33	6	12|6|4|0	0	0	0	0	0	-20.2	0.61	0.55
Telomere	Q02447	SP3	2|0|0|0|0|0	2	0.33	6	0|0|0|0	0.32	0.96	0.32	0.96	0.32	-1.37	3.33	0.44
Telomere	Q02487	DSC2	1|0|0|0|0|0	1	0.17	6	0|0|0|1	0	0	0	0	0	-1.91	0.67	0.55
Telomere	Q02543	RPL18A	0|5|4|6|3|4	22	3.67	6	5|2|1|1	0.18	0.34	0.18	0.34	0.18	-9.61	1.63	0.52
Telomere	Q02750	MAP2K1	1|0|0|0|0|1	2	0.33	6	0|0|0|0	0	0	0	0	0	-1.37	3.33	0.55
Telomere	Q02790	FKBP4	18|12|7|6|4|7	54	9	6	8|0|1|6	0.49	0.93	0.49	0.93	0.49	-7.73	2.4	0.26
Telomere	Q02809	PLOD1	4|0|0|1|1|0	6	1	6	0|0|0|0	0.33	1	0.33	1	0.33	-1.37	10	0.37
Telomere	Q02818	NUCB1	0|1|0|0|0|1	2	0.33	6	0|0|0|0	0	0	0	0	0	-1.37	3.33	0.55
Telomere	Q02878	RPL6	5|14|10|11|4|12	56	9.33	6	12|4|2|5	0.02	0.05	0.02	0.05	0.02	-15.11	1.62	0.54
Telomere	Q02880	TOP2B	8|4|0|0|0|0	12	2	6	0|0|0|0	0.67	1	0.67	1	0.67	-1.37	20	0.14
Telomere	Q02952	AKAP12	40|27|13|10|12|40	142	23.67	6	7|1|0|7	1	1	1	1	1	-1.21	6.31	0
Telomere	Q02978	SLC25A11	1|0|1|1|0|1	4	0.67	6	0|0|0|0	0	0	0	0	0	-1.37	6.67	0.55
Telomere	Q03001	DST	31|1|0|0|0|0	32	5.33	6	0|1|0|3	0.33	1	0.33	1	0.33	-4.16	5.33	0.32
Telomere	Q03135	CAV1	1|0|0|0|1|2	4	0.67	6	0|0|0|0	0.32	0.96	0.32	0.96	0.32	-1.37	6.67	0.44
Telomere	Q03164	KMT2A	4|1|0|0|0|0	5	0.83	6	0|0|0|0	0.33	1	0.33	1	0.33	-1.37	8.33	0.37
Telomere	Q03169	TNFAIP2	0|0|0|0|0|1	1	0.17	6	0|0|0|0	0	0	0	0	0	-1.37	1.67	0.55
Telomere	Q03188	CENPC	1|0|0|0|0|0	1	0.17	6	0|0|0|0	0	0	0	0	0	-1.37	1.67	0.55
Telomere	Q03252	LMNB2	7|8|2|3|3|10	33	5.5	6	9|0|0|1	0.6	0.77	0.6	0.77	0.6	-6.1	2.2	0.22
Telomere	Q03519	TAP2	0|0|0|0|0|1	1	0.17	6	0|0|0|0	0	0	0	0	0	-1.37	1.67	0.55
Telomere	Q03701	CEBPZ	7|0|0|0|0|0	7	1.17	6	0|0|0|3	0.31	0.94	0.31	0.94	0.31	-3.95	1.56	0.49
Telomere	Q04206	RELA	2|0|0|0|0|0	2	0.33	6	0|0|0|0	0.32	0.96	0.32	0.96	0.32	-1.37	3.33	0.44
Telomere	Q04323	UBXN1	3|0|0|0|0|0	3	0.5	6	0|0|0|1	0.32	0.95	0.32	0.95	0.32	-1.91	2	0.48
Telomere	Q04446	GBE1	3|3|1|1|1|1	10	1.67	6	2|0|1|2	0.17	0.26	0.17	0.26	0.17	-3.9	1.33	0.53
Telomere	Q04637	EIF4G1	26|10|11|8|5|19	79	13.17	6	10|0|0|13	0.47	0.9	0.47	0.9	0.47	-13.14	2.29	0.27
Telomere	Q04695	KRT17	1|2|4|4|1|1	13	2.17	6	5|10|6|0	0	0	0	0	0	-19.27	0.41	0.55
Telomere	Q04721	NOTCH2	1|0|0|0|0|0	1	0.17	6	0|0|0|0	0	0	0	0	0	-1.37	1.67	0.55
Telomere	Q04726	TLE3	1|1|0|0|0|0	2	0.33	6	0|0|0|0	0	0	0	0	0	-1.37	3.33	0.55
Telomere	Q04760	GLO1	0|5|1|1|2|1	10	1.67	6	0|0|0|5	0.3	0.72	0.3	0.72	0.3	-4.94	1.33	0.5
Telomere	Q04837	SSBP1	0|0|0|0|0|3	3	0.5	6	0|0|0|0	0.33	0.99	0.33	0.99	0.33	-1.37	5	0.4
Telomere	Q04917	YWHAH	3|2|1|1|0|1	8	1.33	6	0|0|0|1	0.58	0.95	0.58	0.95	0.58	-1.91	5.33	0.23
Telomere	Q04941	PLP2	1|0|0|0|0|0	1	0.17	6	0|0|0|0	0	0	0	0	0	-1.37	1.67	0.55
Telomere	Q05048	CSTF1	3|4|0|0|1|1	9	1.5	6	0|0|0|0	0.66	1	0.66	1	0.66	-1.37	15	0.15
Telomere	Q05086	UBE3A	7|4|0|0|0|0	11	1.83	6	0|0|0|3	0.57	0.94	0.57	0.94	0.57	-3.95	2.44	0.24
Telomere	Q05209	PTPN12	6|0|1|0|0|0	7	1.17	6	1|0|0|0	0.33	1	0.33	1	0.33	-1.91	4.67	0.36
Telomere	Q05397	PTK2	10|0|0|0|1|1	12	2	6	0|0|0|2	0.33	1	0.33	1	0.33	-2.91	4	0.39
Telomere	Q05519	SRSF11	2|2|2|1|2|2	11	1.83	6	2|1|0|0	0.33	0.33	0.33	0.33	0.33	-2.11	2.44	0.39
Telomere	Q05639	EEF1A2	8|1|2|3|1|2	17	2.83	6	1|1|1|3	0.38	0.98	0.38	0.98	0.38	-4.8	1.89	0.3
Telomere	Q05655	PRKCD	4|0|0|0|0|0	4	0.67	6	0|0|0|1	0.33	0.99	0.33	0.99	0.33	-1.91	2.67	0.43
Telomere	Q05682	CALD1	4|0|0|0|0|1	5	0.83	6	0|0|0|0	0.33	1	0.33	1	0.33	-1.37	8.33	0.37
Telomere	Q05BQ5	MBTD1	0|1|0|0|0|0	1	0.17	6	0|0|0|0	0	0	0	0	0	-1.37	1.67	0.55
Telomere	Q05D32	CTDSPL2	1|0|0|0|0|0	1	0.17	6	0|0|0|0	0	0	0	0	0	-1.37	1.67	0.55
Telomere	Q06124	PTPN11	5|4|0|1|2|3	15	2.5	6	0|0|0|3	0.76	0.86	0.76	0.86	0.76	-3.95	3.33	0.09
Telomere	Q06203	PPAT	2|4|3|2|1|1	13	2.17	6	2|0|0|3	0.3	0.52	0.3	0.52	0.3	-3.75	1.73	0.49
Telomere	Q06210	GFPT1	14|4|1|3|3|5	30	5	6	5|1|0|9	0.25	0.75	0.25	0.75	0.25	-13	1.33	0.51
Telomere	Q06265	EXOSC9	2|3|1|1|1|1	9	1.5	6	1|0|0|1	0.45	0.81	0.45	0.81	0.45	-1.2	3	0.28
Telomere	Q06323	PSME1	3|13|7|2|2|3	30	5	6	2|0|0|4	0.66	0.99	0.66	0.99	0.66	-2.91	3.33	0.16
Telomere	Q06330	RBPJ	0|1|1|0|0|0	2	0.33	6	0|0|0|0	0	0	0	0	0	-1.37	3.33	0.55
Telomere	Q06587	RING1	0|1|0|0|0|1	2	0.33	6	0|0|0|0	0	0	0	0	0	-1.37	3.33	0.55
Telomere	Q06830	PRDX1	13|15|14|13|9|16	80	13.33	6	11|5|3|24	0	0	0	0	0	-24.93	1.24	0.55
Telomere	Q07020	RPL18	4|7|10|12|5|4	42	7	6	11|9|6|5	0	0	0	0	0	-23.19	0.9	0.55
Telomere	Q07021	C1QBP	2|6|4|4|4|9	29	4.83	6	5|1|0|0	0.67	0.89	0.67	0.89	0.67	-2.67	3.22	0.12
Telomere	Q07065	CKAP4	8|5|1|2|2|9	27	4.5	6	1|0|0|1	1	1	1	1	1	-1.2	9	0
Telomere	Q07157	TJP1	21|3|3|4|1|1	33	5.5	6	2|0|0|4	0.51	1	0.51	1	0.51	-4.59	3.67	0.26
Telomere	Q07666	KHDRBS1	5|12|7|6|5|9	44	7.33	6	1|0|0|1	1	1	1	1	1	4.29	14.67	0
Telomere	Q07812	BAX	2|0|0|0|0|0	2	0.33	6	0|0|0|0	0.32	0.96	0.32	0.96	0.32	-1.37	3.33	0.44
Telomere	Q07864	POLE	10|2|0|0|0|1	13	2.17	6	0|0|0|0	0.65	1	0.65	1	0.65	-1.37	21.67	0.17
Telomere	Q07866	KLC1	9|0|0|1|1|5	16	2.67	6	1|0|0|3	0.59	0.98	0.59	0.98	0.59	-4.16	2.67	0.23
Telomere	Q07955	SRSF1	5|13|4|6|6|8	42	7	6	2|1|0|1	0.99	1	0.99	1	0.99	0.98	7	0
Telomere	Q07960	ARHGAP1	0|1|1|1|0|0	3	0.5	6	0|0|0|1	0	0	0	0	0	-1.91	2	0.55
Telomere	Q07973	CYP24A1	1|0|0|0|0|0	1	0.17	6	1|0|0|0	0	0	0	0	0	-1.91	0.67	0.55
Telomere	Q08188	TGM3	0|1|1|1|0|0	3	0.5	6	3|2|3|0	0	0	0	0	0	-8.6	0.25	0.55
Telomere	Q08209	PPP3CA	9|1|1|1|0|1	13	2.17	6	2|0|0|4	0.31	0.93	0.31	0.93	0.31	-6.4	1.44	0.49
Telomere	Q08211	DHX9	47|35|21|16|15|28	162	27	6	14|1|1|40	0.06	0.19	0.06	0.19	0.06	-27.01	1.93	0.54
Telomere	Q08257	CRYZ	0|1|0|0|0|0	1	0.17	6	1|0|0|1	0	0	0	0	0	-2.81	0.33	0.55
Telomere	Q08345	DDR1	2|0|0|0|0|0	2	0.33	6	0|0|0|0	0.32	0.96	0.32	0.96	0.32	-1.37	3.33	0.44
Telomere	Q08357	SLC20A2	1|0|0|0|0|0	1	0.17	6	0|0|0|0	0	0	0	0	0	-1.37	1.67	0.55
Telomere	Q08378	GOLGA3	10|0|0|0|0|0	10	1.67	6	0|0|0|2	0.33	1	0.33	1	0.33	-2.91	3.33	0.39
Telomere	Q08379	GOLGA2	10|0|0|0|0|1	11	1.83	6	1|0|0|2	0.33	1	0.33	1	0.33	-3.71	2.44	0.35
Telomere	Q08380	LGALS3BP	2|0|0|1|0|0	3	0.5	6	0|0|0|0	0.32	0.96	0.32	0.96	0.32	-1.37	5	0.44
Telomere	Q08554	DSC1	0|3|1|1|0|0	5	0.83	6	3|3|2|0	0.01	0.03	0.01	0.03	0.01	-8.6	0.42	0.54
Telomere	Q08752	PPID	5|3|1|2|1|4	16	2.67	6	1|0|0|3	0.64	0.79	0.64	0.79	0.64	-2.76	2.67	0.2
Telomere	Q08945	SSRP1	12|17|4|9|6|9	57	9.5	6	4|0|0|8	0.72	0.93	0.72	0.93	0.72	-4.97	3.17	0.1
Telomere	Q08AD1	CAMSAP2	11|0|0|0|0|1	12	2	6	0|0|0|0	0.33	1	0.33	1	0.33	-1.37	20	0.32
Telomere	Q08AM6	VAC14	2|0|0|0|1|1	4	0.67	6	0|0|0|1	0.26	0.79	0.26	0.79	0.26	-1.91	2.67	0.5
Telomere	Q08J23	NSUN2	9|7|2|2|2|4	26	4.33	6	1|0|0|5	0.7	0.89	0.7	0.89	0.7	-2.67	2.89	0.11
Telomere	Q09028	RBBP4	5|9|4|5|2|4	29	4.83	6	3|0|0|3	0.71	0.95	0.71	0.95	0.71	-3.02	3.22	0.1
Telomere	Q09161	NCBP1	6|7|1|0|1|3	18	3	6	1|0|0|2	0.87	1	0.87	1	0.87	-3.71	4	0.04
Telomere	Q09472	EP300	1|0|0|0|0|0	1	0.17	6	0|0|0|0	0	0	0	0	0	-1.37	1.67	0.55
Telomere	Q09666	AHNAK	134|50|13|11|5|57	270	45	6	18|1|1|73	0.32	0.97	0.32	0.97	0.32	-83.21	1.94	0.44
Telomere	Q0IIM8	TBC1D8B	2|0|0|0|0|0	2	0.33	6	0|0|0|0	0.32	0.96	0.32	0.96	0.32	-1.37	3.33	0.44
Telomere	Q0VDF9	HSPA14	5|0|1|1|0|2	9	1.5	6	1|1|0|2	0.36	0.89	0.36	0.89	0.36	-4.4	1.5	0.3
Telomere	Q0VF96	CGNL1	0|1|0|0|0|0	1	0.17	6	0|0|0|0	0	0	0	0	0	-1.37	1.67	0.55
Telomere	Q10469	MGAT2	1|0|0|0|0|0	1	0.17	6	0|0|0|0	0	0	0	0	0	-1.37	1.67	0.55
Telomere	Q10471	GALNT2	5|0|0|0|0|0	5	0.83	6	0|0|0|0	0.33	1	0.33	1	0.33	-1.37	8.33	0.35
Telomere	Q10472	GALNT1	3|0|0|0|0|0	3	0.5	6	0|0|0|0	0.33	0.99	0.33	0.99	0.33	-1.37	5	0.4
Telomere	Q10567	AP1B1	12|1|0|1|0|0	14	2.33	6	0|0|0|11	0.28	0.83	0.28	0.83	0.28	-11.08	0.85	0.5
Telomere	Q10570	CPSF1	12|14|4|3|2|3	38	6.33	6	1|0|0|1	0.98	1	0.98	1	0.98	0.13	12.67	0.01
Telomere	Q10713	PMPCA	1|3|2|4|5|5	20	3.33	6	4|0|0|0	0.75	0.77	0.75	0.77	0.75	-2.41	3.33	0.09
Telomere	Q12765	SCRN1	2|0|2|2|0|1	7	1.17	6	1|0|0|1	0.53	0.53	0.53	0.53	0.53	-2.81	2.33	0.25
Telomere	Q12768	WASHC5	7|0|0|2|0|0	9	1.5	6	1|0|0|6	0.26	0.74	0.26	0.74	0.26	-7.32	0.86	0.51
Telomere	Q12769	NUP160	28|0|0|0|2|4	34	5.67	6	1|0|0|18	0.31	0.93	0.31	0.93	0.31	-19.47	1.19	0.49
Telomere	Q12788	TBL3	13|4|3|4|3|4	31	5.17	6	4|0|0|7	0.3	0.88	0.3	0.88	0.3	-5.62	1.88	0.49
Telomere	Q12789	GTF3C1	13|10|0|2|0|1	26	4.33	6	0|0|0|0	0.99	1	0.99	1	0.99	-1.37	43.33	0
Telomere	Q12792	TWF1	4|3|0|0|0|0	7	1.17	6	0|0|0|1	0.65	0.99	0.65	0.99	0.65	-1.91	4.67	0.19
Telomere	Q12797	ASPH	2|3|2|3|0|4	14	2.33	6	1|0|0|0	0.96	0.99	0.96	0.99	0.96	-1.91	9.33	0.01
Telomere	Q12800	TFCP2	2|1|0|1|0|0	4	0.67	6	0|0|0|3	0.15	0.44	0.15	0.44	0.15	-3.95	0.89	0.53
Telomere	Q12802	AKAP13	4|0|0|0|0|0	4	0.67	6	0|0|0|0	0.33	1	0.33	1	0.33	-1.37	6.67	0.37
Telomere	Q12824	SMARCB1	2|3|1|1|0|1	8	1.33	6	0|0|0|0	0.65	0.99	0.65	0.99	0.65	-1.37	13.33	0.18
Telomere	Q12830	BPTF	8|2|0|0|0|0	10	1.67	6	0|0|0|0	0.65	1	0.65	1	0.65	-1.37	16.67	0.17
Telomere	Q12834	CDC20	4|0|0|0|0|0	4	0.67	6	0|0|0|1	0.33	0.99	0.33	0.99	0.33	-1.91	2.67	0.43
Telomere	Q12849	GRSF1	9|2|4|6|4|10	35	5.83	6	4|0|0|2	0.87	0.95	0.87	0.95	0.87	-2.91	3.89	0.05
Telomere	Q12851	MAP4K2	1|0|0|0|0|1	2	0.33	6	0|0|0|0	0	0	0	0	0	-1.37	3.33	0.55
Telomere	Q12872	SFSWAP	4|3|0|1|0|1	9	1.5	6	0|0|0|0	0.66	1	0.66	1	0.66	-1.37	15	0.15
Telomere	Q12873	CHD3	0|1|0|0|0|0	1	0.17	6	0|0|0|0	0	0	0	0	0	-1.37	1.67	0.55
Telomere	Q12874	SF3A3	6|15|2|3|4|5	35	5.83	6	1|0|0|3	0.89	1	0.89	1	0.89	-1.28	5.83	0.04
Telomere	Q12888	TP53BP1	18|20|3|4|2|1	48	8	6	0|0|0|0	1	1	1	1	1	1.14	80	0
Telomere	Q12899	TRIM26	2|0|0|0|0|0	2	0.33	6	0|0|0|0	0.32	0.96	0.32	0.96	0.32	-1.37	3.33	0.44
Telomere	Q12904	AIMP1	5|1|1|5|2|2	16	2.67	6	1|0|0|4	0.51	0.7	0.51	0.7	0.51	-3.56	2.13	0.26
Telomere	Q12905	ILF2	17|16|8|9|7|16	73	12.17	6	5|0|0|11	0.81	0.84	0.81	0.84	0.81	-4.42	3.04	0.06
Telomere	Q12906	ILF3	28|29|13|14|10|16	110	18.33	6	8|0|0|10	0.87	0.97	0.87	0.97	0.87	-3.03	4.07	0.04
Telomere	Q12907	LMAN2	1|0|0|0|0|0	1	0.17	6	0|0|0|0	0	0	0	0	0	-1.37	1.67	0.55
Telomere	Q12929	EPS8	6|0|0|0|0|0	6	1	6	0|0|0|0	0.33	1	0.33	1	0.33	-1.37	10	0.34
Telomere	Q12931	TRAP1	8|22|21|18|15|18	102	17	6	20|3|4|7	0.01	0.02	0.01	0.02	0.01	-18.44	2	0.54
Telomere	Q12933	TRAF2	1|1|0|0|0|0	2	0.33	6	0|0|0|1	0	0	0	0	0	-1.91	1.33	0.55
Telomere	Q12959	DLG1	3|1|0|0|0|1	5	0.83	6	0|0|0|0	0.33	0.99	0.33	0.99	0.33	-1.37	8.33	0.4
Telomere	Q12965	MYO1E	5|0|0|0|0|0	5	0.83	6	0|0|0|3	0.29	0.86	0.29	0.86	0.29	-3.95	1.11	0.5
Telomere	Q12968	NFATC3	3|0|0|0|0|0	3	0.5	6	0|0|0|0	0.33	0.99	0.33	0.99	0.33	-1.37	5	0.4
Telomere	Q12972	PPP1R8	3|1|0|0|1|1	6	1	6	0|0|0|1	0.32	0.95	0.32	0.95	0.32	-1.91	4	0.48
Telomere	Q12979	ABR	3|0|0|0|0|0	3	0.5	6	0|0|0|1	0.32	0.95	0.32	0.95	0.32	-1.91	2	0.48
Telomere	Q12996	CSTF3	11|11|1|1|1|1	26	4.33	6	1|0|0|1	0.67	1	0.67	1	0.67	-1.2	8.67	0.12
Telomere	Q13009	TIAM1	1|1|0|0|0|0	2	0.33	6	0|0|0|0	0	0	0	0	0	-1.37	3.33	0.55
Telomere	Q13011	ECH1	0|1|1|1|0|1	4	0.67	6	1|0|0|0	0	0	0	0	0	-1.91	2.67	0.55
Telomere	Q13017	ARHGAP5	2|0|0|0|0|0	2	0.33	6	0|0|0|0	0.32	0.96	0.32	0.96	0.32	-1.37	3.33	0.44
Telomere	Q13033	STRN3	7|0|0|0|0|0	7	1.17	6	0|0|0|0	0.33	1	0.33	1	0.33	-1.37	11.67	0.33
Telomere	Q13042	CDC16	3|1|0|0|1|1	6	1	6	0|0|0|0	0.33	0.99	0.33	0.99	0.33	-1.37	10	0.4
Telomere	Q13043	STK4	1|0|0|0|0|0	1	0.17	6	0|0|0|0	0	0	0	0	0	-1.37	1.67	0.55
Telomere	Q13045	FLII	16|1|0|3|1|2	23	3.83	6	1|0|0|5	0.42	0.99	0.42	0.99	0.42	-6.24	2.56	0.29
Telomere	Q13049	TRIM32	2|0|0|0|0|0	2	0.33	6	0|0|0|1	0.26	0.79	0.26	0.79	0.26	-1.91	1.33	0.5
Telomere	Q13057	COASY	1|0|0|0|0|0	1	0.17	6	0|0|0|0	0	0	0	0	0	-1.37	1.67	0.55
Telomere	Q13084	MRPL28	3|0|0|0|0|2	5	0.83	6	0|0|0|0	0.65	0.99	0.65	0.99	0.65	-1.37	8.33	0.18
Telomere	Q13085	ACACA	63|106|139|150|212|142	812	135.33	6	194|94|83|32	0	0	0	0	0	-270.36	1.34	0.55
Telomere	Q13098	GPS1	2|6|2|0|0|3	13	2.17	6	0|0|0|2	0.77	0.97	0.77	0.97	0.77	-2.91	4.33	0.08
Telomere	Q13107	USP4	4|0|0|0|0|0	4	0.67	6	0|0|0|0	0.33	1	0.33	1	0.33	-1.37	6.67	0.37
Telomere	Q13111	CHAF1A	4|0|1|0|0|1	6	1	6	0|0|0|0	0.33	1	0.33	1	0.33	-1.37	10	0.37
Telomere	Q13112	CHAF1B	4|2|0|0|0|1	7	1.17	6	0|0|0|0	0.65	1	0.65	1	0.65	-1.37	11.67	0.17
Telomere	Q13115	DUSP4	0|1|0|0|0|0	1	0.17	6	0|0|0|0	0	0	0	0	0	-1.37	1.67	0.55
Telomere	Q13123	IK	3|4|3|2|3|2	17	2.83	6	1|0|0|1	0.86	0.95	0.86	0.95	0.86	0.13	5.67	0.05
Telomere	Q13126	MTAP	6|12|3|5|2|7	35	5.83	6	0|0|1|10	0.43	0.83	0.43	0.83	0.43	-7.03	2.12	0.28
Telomere	Q13129	RLF	1|0|0|0|0|0	1	0.17	6	0|0|0|0	0	0	0	0	0	-1.37	1.67	0.55
Telomere	Q13131	PRKAA1	4|0|1|1|0|1	7	1.17	6	0|0|0|3	0.26	0.77	0.26	0.77	0.26	-3.95	1.56	0.51
Telomere	Q13136	PPFIA1	8|0|0|0|0|0	8	1.33	6	0|0|0|3	0.32	0.96	0.32	0.96	0.32	-3.95	1.78	0.44
Telomere	Q13137	CALCOCO2	3|0|0|0|0|0	3	0.5	6	0|0|0|0	0.33	0.99	0.33	0.99	0.33	-1.37	5	0.4
Telomere	Q13144	EIF2B5	1|0|0|0|0|1	2	0.33	6	0|0|0|1	0	0	0	0	0	-1.91	1.33	0.55
Telomere	Q13148	TARDBP	6|4|3|3|3|5	24	4	6	1|0|0|1	0.98	1	0.98	1	0.98	1.47	8	0.01
Telomere	Q13151	HNRNPA0	2|6|2|4|5|4	23	3.83	6	1|0|0|1	0.98	1	0.98	1	0.98	0.13	7.67	0.01
Telomere	Q13153	PAK1	1|0|0|0|0|0	1	0.17	6	0|0|0|0	0	0	0	0	0	-1.37	1.67	0.55
Telomere	Q13155	AIMP2	3|0|0|1|1|2	7	1.17	6	0|0|0|4	0.28	0.53	0.28	0.53	0.28	-3.82	1.17	0.5
Telomere	Q13162	PRDX4	4|2|1|2|0|2	11	1.83	6	1|0|0|0	0.86	0.99	0.86	0.99	0.86	-1.91	7.33	0.05
Telomere	Q13177	PAK2	3|4|1|1|0|3	12	2	6	0|0|0|4	0.59	0.69	0.59	0.69	0.59	-3.82	2	0.23
Telomere	Q13185	CBX3	6|8|5|5|4|9	37	6.17	6	4|0|0|5	0.6	0.78	0.6	0.78	0.6	-2.7	2.74	0.22
Telomere	Q13188	STK3	5|0|0|0|1|0	6	1	6	0|0|0|1	0.33	1	0.33	1	0.33	-1.91	4	0.39
Telomere	Q13200	PSMD2	24|11|3|3|5|7	53	8.83	6	5|0|1|7	0.57	0.99	0.57	0.99	0.57	-7.57	2.72	0.24
Telomere	Q13206	DDX10	6|1|0|2|0|1	10	1.67	6	0|0|0|3	0.45	0.91	0.45	0.91	0.45	-3.95	2.22	0.27
Telomere	Q13232	NME3	0|0|0|1|0|0	1	0.17	6	0|0|0|0	0	0	0	0	0	-1.37	1.67	0.55
Telomere	Q13242	SRSF9	2|7|2|2|2|3	18	3	6	1|0|0|1	0.78	1	0.78	1	0.78	0.13	6	0.08
Telomere	Q13243	SRSF5	2|2|0|0|0|0	4	0.67	6	0|0|0|0	0.64	0.96	0.64	0.96	0.64	-1.37	6.67	0.2
Telomere	Q13247	SRSF6	2|8|3|5|1|3	22	3.67	6	3|1|0|2	0.6	0.99	0.6	0.99	0.6	-4.83	2.44	0.22
Telomere	Q13257	MAD2L1	2|0|0|0|0|0	2	0.33	6	0|0|0|0	0.32	0.96	0.32	0.96	0.32	-1.37	3.33	0.44
Telomere	Q13263	TRIM28	39|25|20|19|15|26	144	24	6	8|0|0|24	0.51	0.93	0.51	0.93	0.51	-7.81	3	0.26
Telomere	Q13283	G3BP1	4|4|7|5|8|9	37	6.17	6	3|0|0|4	0.83	0.9	0.83	0.9	0.83	-1.26	3.52	0.06
Telomere	Q13308	PTK7	3|3|0|0|0|0	6	1	6	0|0|0|0	0.66	0.99	0.66	0.99	0.66	-1.37	10	0.16
Telomere	Q13310	PABPC4	3|3|0|2|0|1	9	1.5	6	1|0|0|2	0.53	0.64	0.53	0.64	0.53	-3.71	2	0.25
Telomere	Q13325	IFIT5	5|0|0|0|0|0	5	0.83	6	0|0|0|0	0.33	1	0.33	1	0.33	-1.37	8.33	0.35
Telomere	Q13330	MTA1	4|7|3|3|2|4	23	3.83	6	1|0|0|3	0.76	0.94	0.76	0.94	0.76	-1.28	3.83	0.09
Telomere	Q13347	EIF3I	4|1|0|0|1|7	13	2.17	6	0|0|0|1	0.66	1	0.66	1	0.66	-1.91	8.67	0.16
Telomere	Q13356	PPIL2	3|0|0|0|0|0	3	0.5	6	0|0|0|0	0.33	0.99	0.33	0.99	0.33	-1.37	5	0.4
Telomere	Q13363	CTBP1	1|4|0|2|1|2	10	1.67	6	1|0|0|2	0.51	0.86	0.51	0.86	0.51	-3.71	2.22	0.26
Telomere	Q13404	UBE2V1	0|2|2|0|0|1	5	0.83	6	1|0|0|1	0.35	0.53	0.35	0.53	0.35	-2.81	1.67	0.31
Telomere	Q13405	MRPL49	0|1|0|0|1|0	2	0.33	6	0|0|0|0	0	0	0	0	0	-1.37	3.33	0.55
Telomere	Q13409	DYNC1I2	5|0|1|0|0|2	8	1.33	6	0|0|0|0	0.65	1	0.65	1	0.65	-1.37	13.33	0.17
Telomere	Q13415	ORC1	2|0|0|0|0|0	2	0.33	6	0|0|0|0	0.32	0.96	0.32	0.96	0.32	-1.37	3.33	0.44
Telomere	Q13416	ORC2	0|1|0|0|0|0	1	0.17	6	0|0|0|0	0	0	0	0	0	-1.37	1.67	0.55
Telomere	Q13418	ILK	4|1|1|0|0|2	8	1.33	6	0|0|0|3	0.41	0.77	0.41	0.77	0.41	-3.95	1.78	0.29
Telomere	Q13425	SNTB2	2|1|0|0|0|0	3	0.5	6	0|0|0|0	0.32	0.96	0.32	0.96	0.32	-1.37	5	0.44
Telomere	Q13426	XRCC4	4|3|0|0|0|0	7	1.17	6	0|0|0|0	0.66	1	0.66	1	0.66	-1.37	11.67	0.15
Telomere	Q13427	PPIG	1|4|0|0|0|1	6	1	6	0|0|0|0	0.33	1	0.33	1	0.33	-1.37	10	0.37
Telomere	Q13428	TCOF1	5|4|1|1|0|6	17	2.83	6	1|1|1|1	0.86	0.96	0.86	0.96	0.86	-4.4	2.83	0.05
Telomere	Q13435	SF3B2	18|25|9|10|6|11	79	13.17	6	2|0|0|5	0.98	1	0.98	1	0.98	0.47	7.52	0.01
Telomere	Q13438	OS9	1|0|0|0|0|0	1	0.17	6	0|0|0|0	0	0	0	0	0	-1.37	1.67	0.55
Telomere	Q13439	GOLGA4	21|0|0|0|0|0	21	3.5	6	0|0|0|0	0.33	1	0.33	1	0.33	-1.37	35	0.31
Telomere	Q13442	PDAP1	0|3|2|2|0|2	9	1.5	6	1|0|0|0	0.85	0.95	0.85	0.95	0.85	-1.91	6	0.05
Telomere	Q13451	FKBP5	9|5|0|1|0|2	17	2.83	6	0|0|0|0	0.99	1	0.99	1	0.99	-1.37	28.33	0
Telomere	Q13459	MYO9B	6|0|0|0|0|0	6	1	6	0|0|0|2	0.32	0.97	0.32	0.97	0.32	-2.91	2	0.43
Telomere	Q13464	ROCK1	14|0|0|0|0|0	14	2.33	6	0|0|0|0	0.33	1	0.33	1	0.33	-1.37	23.33	0.32
Telomere	Q13470	TNK1	1|0|0|0|0|0	1	0.17	6	0|0|0|0	0	0	0	0	0	-1.37	1.67	0.55
Telomere	Q13472	TOP3A	1|0|0|0|0|0	1	0.17	6	0|0|0|0	0	0	0	0	0	-1.37	1.67	0.55
Telomere	Q13485	SMAD4	1|1|0|1|0|1	4	0.67	6	0|0|0|0	0	0	0	0	0	-1.37	6.67	0.55
Telomere	Q13489	BIRC3	0|1|0|0|0|0	1	0.17	6	0|0|0|1	0	0	0	0	0	-1.91	0.67	0.55
Telomere	Q13492	PICALM	6|1|0|0|0|0	7	1.17	6	0|0|0|4	0.28	0.84	0.28	0.84	0.28	-3.82	1.17	0.5
Telomere	Q13496	MTM1	1|0|0|0|0|0	1	0.17	6	0|0|0|0	0	0	0	0	0	-1.37	1.67	0.55
Telomere	Q13501	SQSTM1	7|3|0|0|0|0	10	1.67	6	0|0|0|4	0.47	0.89	0.47	0.89	0.47	-3.82	1.67	0.27
Telomere	Q13503	MED21	0|1|0|0|0|0	1	0.17	6	0|0|0|0	0	0	0	0	0	-1.37	1.67	0.55
Telomere	Q13505	MTX1	1|0|0|0|0|1	2	0.33	6	0|0|0|0	0	0	0	0	0	-1.37	3.33	0.55
Telomere	Q13509	TUBB3	10|2|1|1|4|4	22	3.67	6	2|0|0|2	0.81	1	0.81	1	0.81	-2.96	3.67	0.07
Telomere	Q13523	PRPF4B	6|5|1|3|1|3	19	3.17	6	0|0|0|0	1	1	1	1	1	1.14	31.67	0
Telomere	Q13526	PIN1	0|1|1|1|0|3	6	1	6	1|1|0|2	0.15	0.44	0.15	0.44	0.15	-4.4	1	0.53
Telomere	Q13535	ATR	7|2|0|0|0|0	9	1.5	6	0|0|0|0	0.65	1	0.65	1	0.65	-1.37	15	0.17
Telomere	Q13546	RIPK1	3|0|0|0|0|0	3	0.5	6	0|0|0|1	0.32	0.95	0.32	0.95	0.32	-1.91	2	0.48
Telomere	Q13547	HDAC1	2|4|3|2|1|2	14	2.33	6	0|0|0|3	0.62	0.77	0.62	0.77	0.62	-1.58	3.11	0.21
Telomere	Q13555	CAMK2G	3|0|0|0|0|0	3	0.5	6	0|0|0|1	0.32	0.95	0.32	0.95	0.32	-1.91	2	0.48
Telomere	Q13557	CAMK2D	6|3|0|0|1|3	13	2.17	6	1|0|0|4	0.48	0.79	0.48	0.79	0.48	-5.18	1.73	0.27
Telomere	Q13561	DCTN2	4|1|1|1|0|2	9	1.5	6	1|0|0|3	0.3	0.67	0.3	0.67	0.3	-4.16	1.5	0.5
Telomere	Q13564	NAE1	4|2|0|0|0|0	6	1	6	0|0|0|0	0.65	1	0.65	1	0.65	-1.37	10	0.17
Telomere	Q13568	IRF5	1|0|0|0|0|0	1	0.17	6	0|0|0|0	0	0	0	0	0	-1.37	1.67	0.55
Telomere	Q13572	ITPK1	1|0|0|0|0|0	1	0.17	6	0|0|0|0	0	0	0	0	0	-1.37	1.67	0.55
Telomere	Q13573	SNW1	7|8|2|3|2|3	25	4.17	6	1|0|0|2	0.88	1	0.88	1	0.88	-0.7	5.56	0.04
Telomere	Q13586	STIM1	1|0|0|0|0|0	1	0.17	6	0|0|0|0	0	0	0	0	0	-1.37	1.67	0.55
Telomere	Q13595	TRA2A	2|4|1|1|2|2	12	2	6	0|0|1|0	0.86	0.99	0.86	0.99	0.86	-0.3	8	0.05
Telomere	Q13596	SNX1	2|1|0|1|0|1	5	0.83	6	1|0|0|2	0.11	0.33	0.11	0.33	0.11	-3.71	1.11	0.53
Telomere	Q13601	KRR1	0|2|0|0|1|2	5	0.83	6	2|0|0|4	0.03	0.05	0.03	0.05	0.03	-6.4	0.56	0.54
Telomere	Q13610	PWP1	5|0|0|0|0|0	5	0.83	6	0|0|0|0	0.33	1	0.33	1	0.33	-1.37	8.33	0.35
Telomere	Q13613	MTMR1	1|0|0|1|0|0	2	0.33	6	0|0|0|0	0	0	0	0	0	-1.37	3.33	0.55
Telomere	Q13614	MTMR2	1|0|0|0|0|0	1	0.17	6	0|0|0|0	0	0	0	0	0	-1.37	1.67	0.55
Telomere	Q13615	MTMR3	3|0|0|0|0|0	3	0.5	6	0|0|0|0	0.33	0.99	0.33	0.99	0.33	-1.37	5	0.4
Telomere	Q13616	CUL1	10|5|0|1|0|2	18	3	6	1|0|0|3	0.67	0.99	0.67	0.99	0.67	-4.16	3	0.12
Telomere	Q13617	CUL2	8|8|2|3|2|2	25	4.17	6	2|0|0|4	0.65	0.88	0.65	0.88	0.65	-2.91	2.78	0.19
Telomere	Q13618	CUL3	11|5|0|0|0|1	17	2.83	6	0|0|0|7	0.47	0.9	0.47	0.9	0.47	-7.19	1.62	0.27
Telomere	Q13619	CUL4A	2|3|0|0|0|0	5	0.83	6	0|0|0|0	0.65	0.99	0.65	0.99	0.65	-1.37	8.33	0.18
Telomere	Q13620	CUL4B	12|12|3|3|2|4	36	6	6	0|0|0|4	0.88	0.98	0.88	0.98	0.88	-0.87	6	0.04
Telomere	Q13627	DYRK1A	1|1|0|0|0|0	2	0.33	6	0|0|0|1	0	0	0	0	0	-1.91	1.33	0.55
Telomere	Q13630	GFUS	1|2|0|0|0|0	3	0.5	6	0|0|0|0	0.32	0.96	0.32	0.96	0.32	-1.37	5	0.44
Telomere	Q13642	FHL1	1|0|0|0|0|0	1	0.17	6	0|0|0|0	0	0	0	0	0	-1.37	1.67	0.55
Telomere	Q13671	RIN1	4|0|0|0|0|0	4	0.67	6	0|0|0|2	0.29	0.88	0.29	0.88	0.29	-2.91	1.33	0.5
Telomere	Q13685	AAMP	1|0|1|0|0|0	2	0.33	6	0|0|0|0	0	0	0	0	0	-1.37	3.33	0.55
Telomere	Q13724	MOGS	1|2|0|0|0|0	3	0.5	6	0|0|0|2	0.19	0.57	0.19	0.57	0.19	-2.91	1	0.52
Telomere	Q13769	THOC5	0|3|0|0|0|0	3	0.5	6	0|0|0|0	0.33	0.99	0.33	0.99	0.33	-1.37	5	0.4
Telomere	Q13795	ARFRP1	0|0|1|1|0|0	2	0.33	6	1|1|0|0	0	0	0	0	0	-2.81	0.67	0.55
Telomere	Q13796	SHROOM2	1|0|0|0|0|0	1	0.17	6	0|0|0|0	0	0	0	0	0	-1.37	1.67	0.55
Telomere	Q13813	SPTAN1	75|8|5|5|4|15	112	18.67	6	3|0|0|28	0.33	0.99	0.33	0.99	0.33	-21.81	2.41	0.43
Telomere	Q13823	GNL2	7|3|0|2|0|2	14	2.33	6	0|0|0|2	0.78	0.99	0.78	0.99	0.78	-2.91	4.67	0.08
Telomere	Q13825	AUH	0|0|0|1|1|0	2	0.33	6	1|0|0|0	0	0	0	0	0	-1.91	1.33	0.55
Telomere	Q13835	PKP1	0|0|1|1|0|0	2	0.33	6	5|0|2|0	0	0	0	0	0	-7.44	0.19	0.55
Telomere	Q13838	DDX39B	15|25|9|8|7|9	73	12.17	6	4|1|1|5	0.91	1	0.91	1	0.91	-1.01	4.42	0.03
Telomere	Q13867	BLMH	2|2|1|2|1|2	10	1.67	6	3|1|0|0	0.22	0.22	0.22	0.22	0.22	-2.76	1.67	0.52
Telomere	Q13868	EXOSC2	7|3|0|1|0|0	11	1.83	6	0|0|0|3	0.53	0.94	0.53	0.94	0.53	-3.95	2.44	0.25
Telomere	Q13885	TUBB2A	4|1|2|1|1|3	12	2	6	0|0|0|1	0.91	0.99	0.91	0.99	0.91	-0.3	8	0.03
Telomere	Q13888	GTF2H2	1|1|0|0|0|0	2	0.33	6	0|0|0|1	0	0	0	0	0	-1.91	1.33	0.55
Telomere	Q13895	BYSL	4|1|1|1|1|1	9	1.5	6	0|0|0|2	0.29	0.88	0.29	0.88	0.29	-0.86	3	0.5
Telomere	Q13907	IDI1	3|0|0|0|0|1	4	0.67	6	2|0|0|1	0.21	0.64	0.21	0.64	0.21	-3.71	0.89	0.52
Telomere	Q13948	CUX1	2|0|0|0|0|0	2	0.33	6	0|0|0|1	0.26	0.79	0.26	0.79	0.26	-1.91	1.33	0.5
Telomere	Q13951	CBFB	1|2|0|1|1|1	6	1	6	0|0|0|2	0.19	0.57	0.19	0.57	0.19	-2.91	2	0.52
Telomere	Q14004	CDK13	0|1|0|0|0|0	1	0.17	6	0|0|0|0	0	0	0	0	0	-1.37	1.67	0.55
Telomere	Q14008	CKAP5	29|3|3|4|2|8	49	8.17	6	3|0|0|15	0.32	0.95	0.32	0.95	0.32	-13.36	1.81	0.48
Telomere	Q14011	CIRBP	2|2|1|1|2|4	12	2	6	0|0|0|0	0.97	1	0.97	1	0.97	1.14	20	0.01
Telomere	Q14012	CAMK1	0|1|0|0|0|0	1	0.17	6	0|0|0|0	0	0	0	0	0	-1.37	1.67	0.55
Telomere	Q14019	COTL1	0|3|0|0|1|1	5	0.83	6	0|0|0|1	0.32	0.95	0.32	0.95	0.32	-1.91	3.33	0.48
Telomere	Q14103	HNRNPD	5|18|14|12|9|12	70	11.67	6	4|1|1|6	0.96	1	0.96	1	0.96	-4.13	3.89	0.02
Telomere	Q14126	DSG2	18|6|3|3|4|5	39	6.5	6	2|0|0|10	0.34	0.92	0.34	0.92	0.34	-6.24	2.17	0.31
Telomere	Q14137	BOP1	12|6|0|4|4|6	32	5.33	6	3|0|0|7	0.44	0.87	0.44	0.87	0.44	-10.31	2.13	0.28
Telomere	Q14139	UBE4A	5|0|0|0|0|0	5	0.83	6	0|0|0|1	0.33	1	0.33	1	0.33	-1.91	3.33	0.39
Telomere	Q14145	KEAP1	3|0|0|0|0|0	3	0.5	6	0|0|0|0	0.33	0.99	0.33	0.99	0.33	-1.37	5	0.4
Telomere	Q14146	URB2	3|0|0|0|0|0	3	0.5	6	0|0|0|0	0.33	0.99	0.33	0.99	0.33	-1.37	5	0.4
Telomere	Q14147	DHX34	2|0|0|0|0|0	2	0.33	6	0|0|0|0	0.32	0.96	0.32	0.96	0.32	-1.37	3.33	0.44
Telomere	Q14149	MORC3	3|3|1|0|0|0	7	1.17	6	1|0|0|0	0.63	0.95	0.63	0.95	0.63	-1.91	4.67	0.21
Telomere	Q14152	EIF3A	40|12|7|9|7|20	95	15.83	6	7|0|1|16	0.5	0.98	0.5	0.98	0.5	-10.9	2.64	0.26
Telomere	Q14155	ARHGEF7	6|0|0|0|0|0	6	1	6	0|0|0|1	0.33	1	0.33	1	0.33	-1.91	4	0.36
Telomere	Q14156	EFR3A	1|0|0|0|0|0	1	0.17	6	0|0|0|0	0	0	0	0	0	-1.37	1.67	0.55
Telomere	Q14157	UBAP2L	4|5|4|3|5|8	29	4.83	6	1|0|1|4	0.69	0.91	0.69	0.91	0.69	-1.69	3.22	0.11
Telomere	Q14160	SCRIB	14|0|0|0|0|0	14	2.33	6	0|0|0|2	0.33	1	0.33	1	0.33	-2.91	4.67	0.35
Telomere	Q14161	GIT2	1|0|0|0|0|0	1	0.17	6	0|0|0|0	0	0	0	0	0	-1.37	1.67	0.55
Telomere	Q14164	IKBKE	1|0|0|0|0|0	1	0.17	6	0|0|0|0	0	0	0	0	0	-1.37	1.67	0.55
Telomere	Q14165	MLEC	3|3|1|3|0|0	10	1.67	6	1|0|0|0	0.95	0.95	0.95	0.95	0.95	-1.91	6.67	0.02
Telomere	Q14166	TTLL12	17|6|2|2|1|4	32	5.33	6	1|0|0|4	0.78	1	0.78	1	0.78	-3.56	4.27	0.08
Telomere	Q14168	MPP2	1|0|0|0|0|0	1	0.17	6	0|0|0|0	0	0	0	0	0	-1.37	1.67	0.55
Telomere	Q14181	POLA2	2|1|0|0|0|0	3	0.5	6	0|0|0|0	0.32	0.96	0.32	0.96	0.32	-1.37	5	0.44
Telomere	Q14185	DOCK1	6|0|0|0|0|0	6	1	6	0|0|0|0	0.33	1	0.33	1	0.33	-1.37	10	0.34
Telomere	Q14186	TFDP1	1|0|0|0|0|0	1	0.17	6	0|0|0|0	0	0	0	0	0	-1.37	1.67	0.55
Telomere	Q14191	WRN	2|0|0|0|0|0	2	0.33	6	0|0|0|0	0.32	0.96	0.32	0.96	0.32	-1.37	3.33	0.44
Telomere	Q14192	FHL2	0|1|0|0|1|1	3	0.5	6	0|0|0|0	0	0	0	0	0	-1.37	5	0.55
Telomere	Q14195	DPYSL3	3|0|0|0|0|0	3	0.5	6	0|0|0|0	0.33	0.99	0.33	0.99	0.33	-1.37	5	0.4
Telomere	Q14202	ZMYM3	8|3|0|0|4|0	15	2.5	6	0|0|0|2	0.88	0.99	0.88	0.99	0.88	-2.91	5	0.04
Telomere	Q14203	DCTN1	15|2|1|0|0|2	20	3.33	6	2|0|0|6	0.32	0.96	0.32	0.96	0.32	-8.01	1.67	0.44
Telomere	Q14204	DYNC1H1	136|18|19|16|9|25	223	37.17	6	20|0|0|78	0.32	0.97	0.32	0.97	0.32	-78.07	1.52	0.44
Telomere	Q14207	NPAT	3|0|0|0|0|0	3	0.5	6	0|0|0|1	0.32	0.95	0.32	0.95	0.32	-1.91	2	0.48
Telomere	Q14232	EIF2B1	1|0|0|0|0|1	2	0.33	6	0|0|0|0	0	0	0	0	0	-1.37	3.33	0.55
Telomere	Q14240	EIF4A2	3|1|0|1|1|1	7	1.17	6	0|1|0|1	0.27	0.81	0.27	0.81	0.27	-2.81	2.33	0.5
Telomere	Q14241	ELOA	3|1|0|0|0|0	4	0.67	6	0|0|0|0	0.33	0.99	0.33	0.99	0.33	-1.37	6.67	0.4
Telomere	Q14244	MAP7	2|0|0|0|0|0	2	0.33	6	0|0|0|0	0.32	0.96	0.32	0.96	0.32	-1.37	3.33	0.44
Telomere	Q14247	CTTN	11|3|5|4|1|5	29	4.83	6	0|0|0|3	0.9	0.99	0.9	0.99	0.9	-1.58	6.44	0.03
Telomere	Q14254	FLOT2	1|0|0|0|0|0	1	0.17	6	0|0|0|0	0	0	0	0	0	-1.37	1.67	0.55
Telomere	Q14257	RCN2	0|3|0|1|4|3	11	1.83	6	0|0|0|0	1	1	1	1	1	-1.37	18.33	0
Telomere	Q14258	TRIM25	14|5|2|3|3|6	33	5.5	6	6|0|0|9	0.25	0.74	0.25	0.74	0.25	-10.88	1.47	0.52
Telomere	Q14315	FLNC	36|6|3|2|2|9	58	9.67	6	3|0|0|13	0.36	0.98	0.36	0.98	0.36	-11.35	2.42	0.3
Telomere	Q14318	FKBP8	2|0|1|0|0|0	3	0.5	6	0|0|0|1	0.26	0.79	0.26	0.79	0.26	-1.91	2	0.5
Telomere	Q14331	FRG1	2|2|0|0|0|0	4	0.67	6	0|0|0|0	0.64	0.96	0.64	0.96	0.64	-1.37	6.67	0.2
Telomere	Q14344	GNA13	1|0|0|0|0|0	1	0.17	6	0|0|0|0	0	0	0	0	0	-1.37	1.67	0.55
Telomere	Q14353	GAMT	0|1|1|1|0|0	3	0.5	6	0|0|0|0	0	0	0	0	0	-1.37	5	0.55
Telomere	Q14376	GALE	2|2|0|1|0|1	6	1	6	0|0|0|1	0.53	0.79	0.53	0.79	0.53	-1.91	4	0.25
Telomere	Q14444	CAPRIN1	10|4|5|2|6|8	35	5.83	6	1|0|0|4	0.88	0.96	0.88	0.96	0.88	-1.93	4.67	0.04
Telomere	Q14451	GRB7	1|0|0|0|0|0	1	0.17	6	0|0|0|0	0	0	0	0	0	-1.37	1.67	0.55
Telomere	Q14457	BECN1	2|0|0|0|0|0	2	0.33	6	0|0|0|0	0.32	0.96	0.32	0.96	0.32	-1.37	3.33	0.44
Telomere	Q14493	SLBP	0|1|1|0|0|1	3	0.5	6	0|0|0|0	0	0	0	0	0	-1.37	5	0.55
Telomere	Q14498	RBM39	8|5|5|5|2|4	29	4.83	6	3|1|1|2	0.64	0.97	0.64	0.97	0.64	-4.19	2.76	0.21
Telomere	Q14517	FAT1	18|0|0|1|1|1	21	3.5	6	0|0|0|0	0.33	1	0.33	1	0.33	-1.37	35	0.32
Telomere	Q14527	HLTF	3|3|0|1|0|0	7	1.17	6	0|0|0|0	0.66	0.99	0.66	0.99	0.66	-1.37	11.67	0.16
Telomere	Q14558	PRPSAP1	3|0|0|0|0|1	4	0.67	6	1|0|0|3	0.15	0.46	0.15	0.46	0.15	-4.16	0.67	0.53
Telomere	Q14562	DHX8	7|8|1|0|0|1	17	2.83	6	0|0|0|1	0.67	1	0.67	1	0.67	-1.91	11.33	0.13
Telomere	Q14566	MCM6	13|20|9|7|11|8	68	11.33	6	4|0|0|3	0.98	1	0.98	1	0.98	1.15	6.48	0.01
Telomere	Q14573	ITPR3	32|0|0|0|0|3	35	5.83	6	0|0|0|26	0.3	0.91	0.3	0.91	0.3	-26.87	0.9	0.49
Telomere	Q14643	ITPR1	1|0|0|0|0|0	1	0.17	6	0|0|0|0	0	0	0	0	0	-1.37	1.67	0.55
Telomere	Q14651	PLS1	7|0|0|0|0|2	9	1.5	6	0|0|0|0	0.65	1	0.65	1	0.65	-1.37	15	0.17
Telomere	Q14669	TRIP12	16|3|1|3|2|4	29	4.83	6	2|0|0|4	0.51	1	0.51	1	0.51	-4.59	3.22	0.26
Telomere	Q14671	PUM1	1|0|0|0|1|1	3	0.5	6	0|0|0|0	0	0	0	0	0	-1.37	5	0.55
Telomere	Q14674	ESPL1	2|0|0|0|0|0	2	0.33	6	0|0|0|0	0.32	0.96	0.32	0.96	0.32	-1.37	3.33	0.44
Telomere	Q14676	MDC1	21|6|1|2|2|3	35	5.83	6	0|0|0|1	0.98	1	0.98	1	0.98	-0.3	23.33	0.01
Telomere	Q14677	CLINT1	4|0|0|0|0|0	4	0.67	6	0|0|0|2	0.29	0.88	0.29	0.88	0.29	-2.91	1.33	0.5
Telomere	Q14683	SMC1A	17|12|0|3|0|1	33	5.5	6	0|0|0|2	0.92	1	0.92	1	0.92	-2.91	11	0.03
Telomere	Q14684	RRP1B	10|0|0|0|0|0	10	1.67	6	0|0|0|4	0.32	0.96	0.32	0.96	0.32	-3.82	1.67	0.48
Telomere	Q14687	GSE1	1|2|0|0|0|0	3	0.5	6	0|0|0|0	0.32	0.96	0.32	0.96	0.32	-1.37	5	0.44
Telomere	Q14690	PDCD11	25|7|0|0|1|6	39	6.5	6	4|0|0|16	0.3	0.91	0.3	0.91	0.3	-20.55	1.3	0.49
Telomere	Q14691	GINS1	1|1|0|0|0|0	2	0.33	6	0|0|0|1	0	0	0	0	0	-1.91	1.33	0.55
Telomere	Q14692	BMS1	15|1|1|1|0|0	18	3	6	2|0|0|6	0.32	0.96	0.32	0.96	0.32	-8.01	1.5	0.44
Telomere	Q14694	USP10	7|4|3|3|2|6	25	4.17	6	2|0|0|2	0.88	0.98	0.88	0.98	0.88	-1.51	4.17	0.04
Telomere	Q14697	GANAB	4|5|2|2|2|3	18	3	6	1|0|0|0	0.98	1	0.98	1	0.98	1.35	12	0.01
Telomere	Q14728	MFSD10	1|0|0|0|0|0	1	0.17	6	0|0|0|1	0	0	0	0	0	-1.91	0.67	0.55
Telomere	Q14738	PPP2R5D	9|3|0|1|0|2	15	2.5	6	0|0|0|3	0.69	0.98	0.69	0.98	0.69	-3.95	3.33	0.11
Telomere	Q14739	LBR	2|1|1|0|0|2	6	1	6	1|0|0|2	0.22	0.33	0.22	0.33	0.22	-3.71	1.33	0.52
Telomere	Q14746	COG2	11|0|0|0|0|1	12	2	6	0|0|0|2	0.33	1	0.33	1	0.33	-2.91	4	0.37
Telomere	Q14764	MVP	19|2|0|0|0|4	25	4.17	6	0|0|0|14	0.3	0.9	0.3	0.9	0.3	-14.05	1.19	0.49
Telomere	Q14789	GOLGB1	51|2|0|0|0|0	53	8.83	6	0|0|0|13	0.33	0.99	0.33	0.99	0.33	-12.91	2.72	0.4
Telomere	Q14790	CASP8	4|0|0|0|0|0	4	0.67	6	0|0|0|0	0.33	1	0.33	1	0.33	-1.37	6.67	0.37
Telomere	Q14807	KIF22	4|1|1|0|0|0	6	1	6	0|0|0|0	0.33	1	0.33	1	0.33	-1.37	10	0.37
Telomere	Q14814	MEF2D	0|2|0|0|0|0	2	0.33	6	0|0|0|0	0.32	0.96	0.32	0.96	0.32	-1.37	3.33	0.44
Telomere	Q14839	CHD4	24|27|8|7|6|12	84	14	6	5|0|0|7	0.93	0.99	0.93	0.99	0.93	-2.68	4.67	0.02
Telomere	Q14847	LASP1	3|3|4|6|1|4	21	3.5	6	3|0|1|2	0.54	0.9	0.54	0.9	0.54	-4.83	2.33	0.24
Telomere	Q14914	PTGR1	0|1|0|0|0|0	1	0.17	6	0|0|0|0	0	0	0	0	0	-1.37	1.67	0.55
Telomere	Q14919	DRAP1	0|2|1|1|0|1	5	0.83	6	0|0|0|1	0.26	0.79	0.26	0.79	0.26	-1.91	3.33	0.5
Telomere	Q14938	NFIX	2|0|0|0|0|0	2	0.33	6	0|0|0|0	0.32	0.96	0.32	0.96	0.32	-1.37	3.33	0.44
Telomere	Q14966	ZNF638	21|5|0|0|0|0	26	4.33	6	0|0|0|0	0.67	1	0.67	1	0.67	-1.37	43.33	0.13
Telomere	Q14974	KPNB1	25|12|6|8|8|17	76	12.67	6	11|0|0|30	0	0	0	0	0	-27.72	1.24	0.55
Telomere	Q14978	NOLC1	4|3|0|1|1|9	18	3	6	0|0|0|2	0.88	1	0.88	1	0.88	-2.91	6	0.04
Telomere	Q14980	NUMA1	41|33|4|4|5|9	96	16	6	4|0|0|13	0.67	0.99	0.67	0.99	0.67	-9.16	3.76	0.12
Telomere	Q14997	PSME4	5|2|0|0|0|0	7	1.17	6	0|0|0|0	0.65	1	0.65	1	0.65	-1.37	11.67	0.17
Telomere	Q14BN4	SLMAP	1|0|0|0|0|0	1	0.17	6	0|0|0|0	0	0	0	0	0	-1.37	1.67	0.55
Telomere	Q14C86	GAPVD1	15|1|1|0|1|2	20	3.33	6	2|0|0|9	0.3	0.9	0.3	0.9	0.3	-11.3	1.21	0.49
Telomere	Q14CX7	NAA25	8|1|1|0|1|0	11	1.83	6	1|0|0|2	0.33	1	0.33	1	0.33	-3.71	2.44	0.37
Telomere	Q15003	NCAPH	10|1|0|0|0|0	11	1.83	6	0|0|0|3	0.33	0.98	0.33	0.98	0.33	-3.95	2.44	0.43
Telomere	Q15005	SPCS2	1|0|0|0|1|1	3	0.5	6	0|0|0|0	0	0	0	0	0	-1.37	5	0.55
Telomere	Q15007	WTAP	4|6|2|0|0|2	14	2.33	6	0|0|0|0	0.99	1	0.99	1	0.99	-1.37	23.33	0
Telomere	Q15008	PSMD6	8|5|3|0|2|7	25	4.17	6	0|0|0|0	1	1	1	1	1	-1.37	41.67	0
Telomere	Q15014	MORF4L2	0|0|0|0|0|1	1	0.17	6	0|0|0|0	0	0	0	0	0	-1.37	1.67	0.55
Telomere	Q15018	ABRAXAS2	1|0|0|0|0|0	1	0.17	6	0|0|0|0	0	0	0	0	0	-1.37	1.67	0.55
Telomere	Q15019	SEPTIN2	5|4|1|3|1|6	20	3.33	6	1|0|0|3	0.78	0.88	0.78	0.88	0.78	-2.76	3.33	0.08
Telomere	Q15020	SART3	11|19|2|4|7|6	49	8.17	6	1|0|0|5	0.91	0.99	0.91	0.99	0.91	-2.67	5.44	0.03
Telomere	Q15021	NCAPD2	10|2|0|0|1|2	15	2.5	6	1|0|0|3	0.48	0.99	0.48	0.99	0.48	-4.16	2.5	0.27
[truncated: 2,315 more rows]
